# Supplementary material for: Isovalent effects on the structural and electronic features of scandium-doped aluminum clusters ScmAln−m+/0/− with m = 1–2, n = 3–15
Source: Royal Society of Chemistry journal article supplement (doi:10.1039/d5ra09683a), 2026-03-26
Supplement: d5ra09683a1.pdf [file d5ra09683a1.pdf]

## **Supplementary Information (ESI)**

### **Isovalent Effects on the Structural and Electronic Features of Scandium-doped Aluminum Clusters $\text{Sc}_m\text{Al}_{n-m}^{+/0/-}$ with $m = 1 - 2$ , $n = 3-15$**

**Bao-Ngan Nguyen-Ha,<sup>1,2</sup> Nguyen Minh Tam,<sup>3</sup> My Phuong Pham-Ho,<sup>1,2,\*</sup> Minh Tho Nguyen<sup>4</sup>**

<sup>1</sup> Faculty of Chemical Engineering, Ho Chi Minh City University of Technology (HCMUT), 268 Ly Thuong Kiet Street, District 10, Ho Chi Minh City, Vietnam. Emails: [nhbngan.sdh232@hcmut.edu.vn](mailto:nhbngan.sdh232@hcmut.edu.vn), [phmphuong@hcmut.edu.vn](mailto:phmphuong@hcmut.edu.vn)

<sup>2</sup> Vietnam National University Ho Chi Minh City, Linh Trung Ward, Thu Duc, Ho Chi Minh City, Vietnam

<sup>3</sup> Faculty of Basic Sciences, University of Phan Thiet, 225 Nguyen Thong, Phan Thiet City, Vietnam.

<sup>4</sup> Center for Environmental Intelligence and College of Engineering and Computer Science, VinUniversity, Gia Lam, Hanoi, Vietnam.

## Content

- Structures of the lowest-lying cationic, neutral and anionic  $\text{Al}_n^{+/0/-}$  clusters with  $n = 1-15$  (Figure S1).
- The Structures, Multiplicities ( $M$ , in bracket) and Relative Energies ( $rE$ ,  $\text{kcal.mol}^{-1}$ ) of the low-lying  $\text{Sc}_m\text{Al}_{n-m}^{+/0/-}$  ( $m = 1-2$ ,  $n = 3-15$ ) clusters (Figures S2 - S13).
- Structural evolution of the cationic and anionic  $\text{Sc}_m\text{Al}_{n-m}^{+/-}$  ( $m = 0-1$ ,  $n = 3-15$ ) clusters (Figures S14 and S15).
- Average binding energies of the anionic, neutral and cationic  $\text{Al}_n^{+/0/-}$ ,  $\text{ScAl}_{n-1}^{+/0/-}$  and  $\text{Sc}_2\text{Al}_{n-2}^{+/0/-}$  clusters (Figure S16).
- AdNDP analysis showing multi-center bonds in the  $\text{Sc}_m\text{Al}_{n-m}^{+/0/-}$  ( $m = 0-2$ ,  $n = 6$  and  $13$ ) clusters (Figures S17 - S34).
- Average binding energy values ( $E_b$ , eV) of the anionic and cationic  $\text{Sc}_m\text{Al}_{n-m}^{+/-}$  ( $m = 0-1$ ,  $n = 3-15$ ) (Tables S1 and S2).
- Dissociation Energies ( $D_e$ , eV) for Various Fragmentation Channels of  $\text{Sc}_m\text{Al}_{n-m}^{+/0/-}$  ( $m = 1-2$ ,  $n = 3-15$ ) clusters at three charge states (Tables S3 and S4).
- Natural Electron Configuration (NEC) and Natural Charge of the  $\text{Sc}_m\text{Al}_{n-m}^{+/0/-}$  ( $m = 0-2$ ,  $n = 6$  and  $13$ ) clusters at their most stable spin state (Tables S5-S10).
- Energy levels of molecular orbitals (MOs) of the  $\text{Sc}_m\text{Al}_{n-m}^{+/0/-}$  ( $m = 0-2$ ,  $n = 6$  and  $13$ ) clusters at their most stable spin state (Figures S35 - S59)
- Coordinates of the lowest-lying  $\text{Sc}_m\text{Al}_{n-m}^{+/0/-}$  ( $m = 1-2$ ,  $n = 3-15$ ) clusters (Pages 54 - 69).

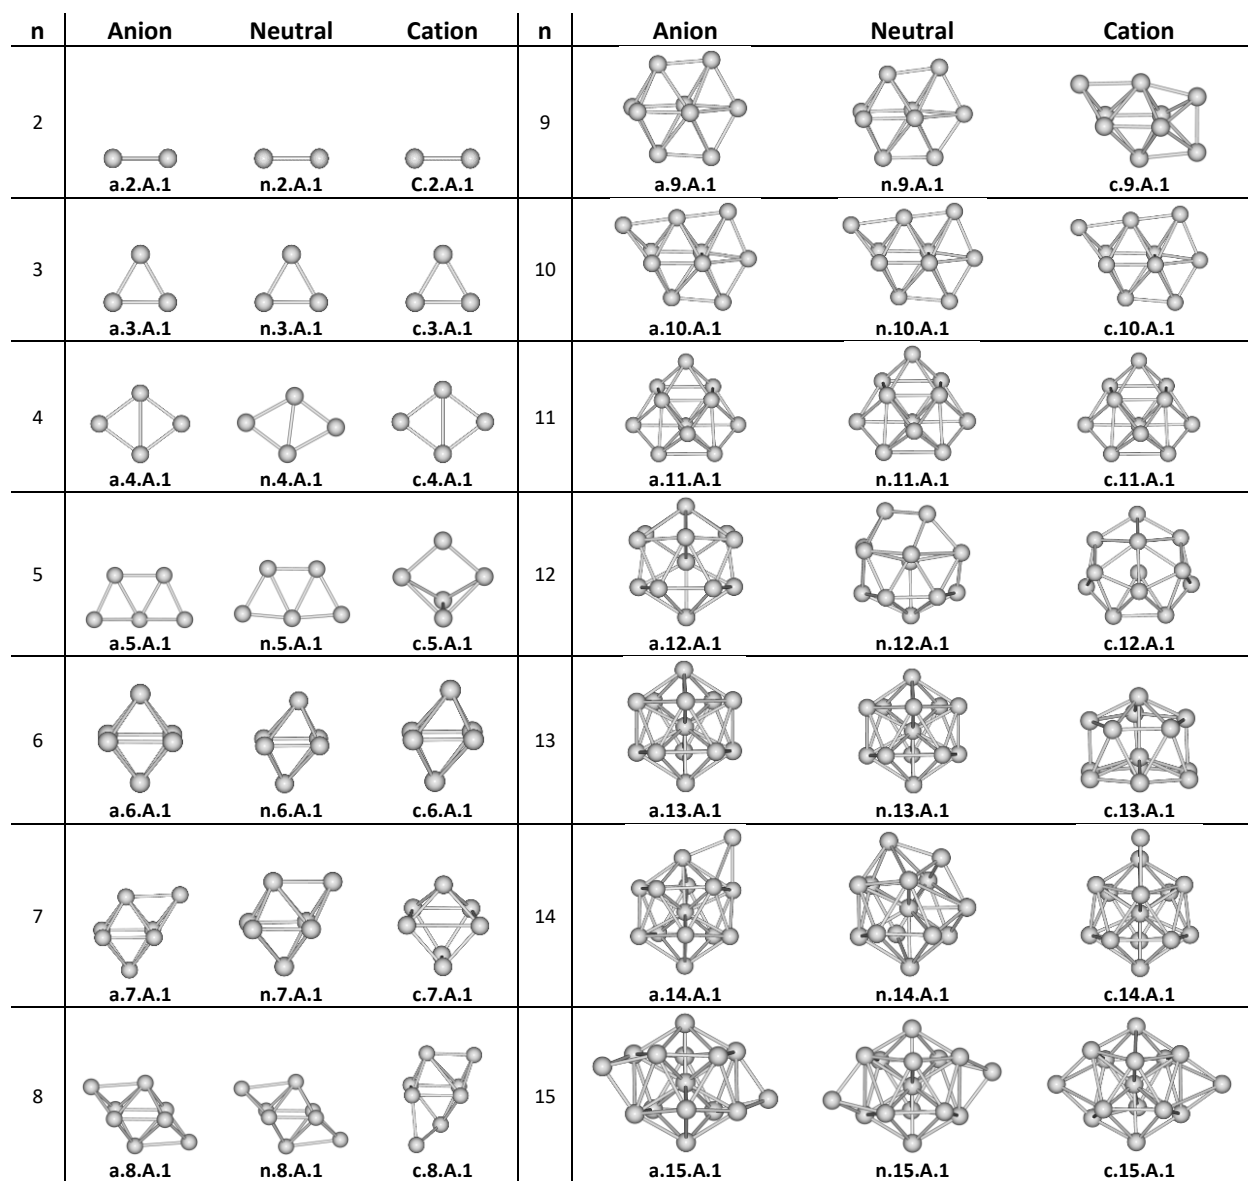

**Figure S1:** Structures of the lowest-lying cationic, neutral and anionic  $Al_n^{+0/-}$  clusters with  $n = 1-15$  calculated at the PBE/ Def2-TZVP+ ZPE method.

|          | Anion                                                                                                 | Neutral                                                                                                | Cation                                                                                                  |
|----------|-------------------------------------------------------------------------------------------------------|--------------------------------------------------------------------------------------------------------|---------------------------------------------------------------------------------------------------------|
| n = 2    | 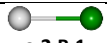<br><b>a.2.B.1</b>   | <br><b>n.2.B.1</b>    | <br><b>c.2.B.1</b>   |
| (M) - rE | (4) 0.0<br>(2) 9.2                                                                                    | (3) 0.0<br>(5) 5.4                                                                                     | (4) 0.0<br>(2) 10.0                                                                                     |
| n = 3    | <br><b>a.3.B.1</b>   | <br><b>n.3.B.1</b>    | <br><b>c.3.B.1</b>   |
| (M) - rE | (1) 0.0<br>(3) 5.7                                                                                    | (2) 0.0<br>(4) 6.2                                                                                     | (1) 0.0<br>(5) 5.5                                                                                      |
| n = 4    | <br><b>a.4.B.1</b>   | <br><b>n.4.B.1</b>    | <br><b>c.4.B.1</b>   |
| (M) - rE | (2) 0.0<br>(4) 1.7                                                                                    | (3) 0.0<br>(1) 5.0                                                                                     | (2) 0.0<br>(4) 1.0                                                                                      |
| n = 4    | <br><b>a.4.B.2</b>   | <br><b>n.4.B.2</b>    | <br><b>c.4.B.2</b>   |
| (M) - rE | (2) 2.7                                                                                               | (1) 18.6                                                                                               | (2) 23.4<br>(4) 28.0                                                                                    |
| n = 4    | <br><b>a.4.B.3</b>   | <br><b>n.4.B.3</b>    | <br><b>c.4.B.3</b>   |
| (M) - rE | (2) 7.1                                                                                               | (3) 34.9                                                                                               |                                                                                                         |
| n = 5    | <br><b>a.5.B.1</b>  | <br><b>n.5.B.1</b>   | <br><b>c.5.B.1</b>  |
| (M) - rE | (3) 0.0<br>(1) 7.1                                                                                    | (2) 0.0<br>(4) 10.8                                                                                    | (1) 0.0<br>(3) 9.6                                                                                      |
| n = 5    | <br><b>a.5.B.2</b>   | <br><b>n.5.B.2</b>   | <br><b>c.5.B.2</b>  |
| (M) - rE | (1) 5.5                                                                                               | (2) 23.5                                                                                               | (1) 18.8                                                                                                |
| n = 5    | <br><b>a.5.B.3</b> | <br><b>n.5.B.3</b>  | <br><b>c.5.B.3</b> |
| (M) - rE | (1) 21.9                                                                                              |                                                                                                        | (1) 22.8                                                                                                |
| n = 6    | <br><b>a.6.B.1</b> | <br><b>n.6.B.1</b>  | <br><b>c.6.B.1</b> |
| (M) - rE | (2) 0.0                                                                                               | (3) 0.0<br>(1) 4.1                                                                                     | (2) 0.0                                                                                                 |
| n = 6    | <br><b>a.6.B.2</b> | <br><b>n.6.B.2</b> | <br><b>c.6.B.2</b> |
| (M) - rE | (4) 7.3                                                                                               | (1) 0.63                                                                                               | (4) 0.9<br>(2) 1.5                                                                                      |
| n = 6    | <br><b>a.6.B.3</b> | <br><b>n.6.B.3</b>  | <br><b>c.6.B.3</b> |
| (M) - rE | (4) 10.0                                                                                              | (1) 6.1                                                                                                | (2) 2.2                                                                                                 |

**Figure S2:** Structures, multiplicities (M, in bracket) and relative energies (rE, kcal.mol<sup>-1</sup>) of the low-lying cationic, neutral and anionic ScAl<sub>n-1</sub><sup>+0/-</sup> clusters with n = 2-6 calculated at the PBE/Def2-TZVP+ ZPE method.

|          | Anion                                                                               |                                                                                    | Neutral                                                                            |                                                                                    | Cation                                                                               |                                                                                      |
|----------|-------------------------------------------------------------------------------------|------------------------------------------------------------------------------------|------------------------------------------------------------------------------------|------------------------------------------------------------------------------------|--------------------------------------------------------------------------------------|--------------------------------------------------------------------------------------|
| n = 7    | 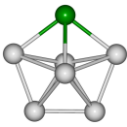   |   |   |  |   |   |
| (M) - rE | a.7.B.1<br>(1) 0.0<br>(3) 0.1                                                       | a.7.B.2<br>(1) 2.1                                                                 | n.7.B.1<br>(2) 0.0<br>(4) 10.1                                                     | n.7.B.2<br>(2) 4.2                                                                 | c.7.B.1<br>(1) 0.0                                                                   | c.7.B.2<br>(1) 7.1                                                                   |
| n = 7    |                                                                                     |                                                                                    |   |                                                                                    |   |                                                                                      |
| (M) - rE |                                                                                     |                                                                                    | n.7.B.3<br>(4) 19.0                                                                |                                                                                    | c.7.B.3<br>(3) 15.0                                                                  |                                                                                      |
| n = 8    |    |   |   |  |   |   |
| (M) - rE | a.8.B.1<br>(4) 0.0                                                                  | a.8.B.2<br>(2) 0.0                                                                 | n.8.B.1<br>(3) 0.0<br>(1) 1.5                                                      | n.8.B.2<br>(1) 2.5<br>(3) 5.0                                                      | c.8.B.1<br>(2) 0.0<br>(4) 4.8                                                        | c.8.B.2<br>(4) 2.0                                                                   |
| n = 8    |   |  |  |                                                                                    |  |  |
| (M) - rE | a.8.B.3<br>(2) 0.4                                                                  | a.8.B.4<br>(2) 2.4                                                                 | n.8.B.3<br>(1) 6.2                                                                 |                                                                                    | c.8.B.3<br>(2) 7.1                                                                   | c.8.B.4<br>(2) 8.4                                                                   |
| n = 8    |  |                                                                                    |                                                                                    |                                                                                    |                                                                                      |                                                                                      |
| (M) - rE | a.8.B.5<br>(2) 3.0                                                                  |                                                                                    |                                                                                    |                                                                                    |                                                                                      |                                                                                      |

**Figure S3:** Structures, multiplicities (M, in bracket) and relative energies (rE, kcal.mol<sup>-1</sup>) of the low-lying cationic, neutral and anionic ScAl<sub>6</sub><sup>+0/-</sup> and ScAl<sub>7</sub><sup>+0/-</sup> clusters calculated at the PBE/Def2-TZVP+ ZPE method.

|          | Anion                                                                               |                                                                                     | Neutral                                                                             |                                                                                      | Cation                                                                                |                                                                                       |
|----------|-------------------------------------------------------------------------------------|-------------------------------------------------------------------------------------|-------------------------------------------------------------------------------------|--------------------------------------------------------------------------------------|---------------------------------------------------------------------------------------|---------------------------------------------------------------------------------------|
| n = 9    | 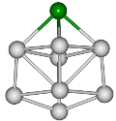   |    |    |    |    |    |
| (M) – rE | <b>a.9.B.1</b><br>(1) 0.0<br>(3) 10.1                                               | <b>a.9.B.2</b><br>(1) 4.9                                                           | <b>n.9.B.1</b><br>(2) 0.0                                                           | <b>n.9.B.2</b><br>(2) 4.0                                                            | <b>c.9.B.1</b><br>(1) 0.0<br>(3) 5.5                                                  | <b>c.9.B.2</b><br>(3) 3.5<br>(1) 4.5                                                  |
| n = 9    |    |                                                                                     |    |    |    |                                                                                       |
| (M) – rE | <b>a.9.B.3</b><br>(1) 7.2<br>(3) 10.6                                               |                                                                                     | <b>n.9.B.3</b><br>(2) 5.4                                                           | <b>n.9.B.4</b><br>(2) 8.0                                                            | <b>c.9.B.3</b><br>(3) 7.9                                                             |                                                                                       |
| n = 9    |                                                                                     |                                                                                     |    |                                                                                      |                                                                                       |                                                                                       |
| (M) – rE |                                                                                     |                                                                                     | <b>n.9.B.5</b><br>(2) 8.7                                                           |                                                                                      |                                                                                       |                                                                                       |
| n = 10   |    |    |    |    |    |    |
| (M) – rE | <b>a.10.B.1</b><br>(2) 0.0                                                          | <b>a.10.B.2</b><br>(2) 1.1                                                          | <b>n.10.B.1</b><br>(1) 0.0                                                          | <b>n.10.B.2</b><br>(1) 1.8                                                           | <b>c.10.B.1</b><br>(2) 0.0                                                            | <b>c.10.B.2</b><br>(2) 2.3                                                            |
| n = 10   |  |  |  |  |  |  |
| (M) – rE | <b>a.10.B.3</b><br>(2) 1.2                                                          | <b>a.10.B.4</b><br>(2) 3.1                                                          | <b>n.10.B.3</b><br>(1) 8.3                                                          | <b>n.10.B.4</b><br>(1) 8.5                                                           | <b>c.10.B.3</b><br>(2) 4.1                                                            | <b>c.10.B.4</b><br>(2) 5.9                                                            |
| n = 10   |                                                                                     |                                                                                     |  |                                                                                      |                                                                                       |                                                                                       |
| (M) – rE |                                                                                     |                                                                                     | <b>n.10.B.5</b><br>(1) 8.8                                                          |                                                                                      |                                                                                       |                                                                                       |

**Figure S4:** Structures, multiplicities (M, in bracket) and relative energies (rE, kcal.mol<sup>-1</sup>) of the low-lying cationic, neutral and anionic ScAl<sub>8</sub><sup>+0/-</sup> and ScAl<sub>9</sub><sup>+0/-</sup> clusters calculated at the PBE/Def2-TZVP+ ZPE method.

|          | Anion                                                                               |                                                                                    | Neutral                                                                             |                                                                                      | Cation                                                                                |                                                                                      |
|----------|-------------------------------------------------------------------------------------|------------------------------------------------------------------------------------|-------------------------------------------------------------------------------------|--------------------------------------------------------------------------------------|---------------------------------------------------------------------------------------|--------------------------------------------------------------------------------------|
| n = 11   | 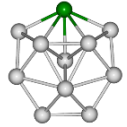   |   |    |    |    |   |
| (M) – rE | <b>a.11.B.1</b><br>(1) 0.0                                                          | <b>a.11.B.2</b><br>(1) 0.1<br>(3) 3.2                                              | <b>n.11.B.1</b><br>(2) 0.0                                                          | <b>n.11.B.2</b><br>(2) 0.2                                                           | <b>c.11.B.1</b><br>(1) 0.0                                                            | <b>c.11.B.2</b><br>(1) 0.7<br>(3) 2.9                                                |
| n = 11   |    |   |    |    |    |   |
| (M) – rE | <b>a.11.B.3</b><br>(1) 1.7<br>(3) 2.2                                               | <b>a.11.B.4</b><br>(1) 2.2                                                         | <b>n.11.B.3</b><br>(2) 1.4                                                          | <b>n.11.B.4</b><br>(2) 3.6                                                           | <b>c.11.B.3</b><br>(1) 1.6                                                            | <b>c.11.B.4</b><br>(1) 4.9                                                           |
| n = 11   |                                                                                     |                                                                                    |    |                                                                                      |    |                                                                                      |
| (M) – rE |                                                                                     |                                                                                    | <b>n.11.B.5</b><br>(2) 3.8                                                          |                                                                                      | <b>c.11.B.5</b><br>(1) 5.1                                                            |                                                                                      |
| n = 12   |   |  |   |   |   |  |
| (M) – rE | <b>a.12.B.1</b><br>(2) 0.0                                                          | <b>a.12.B.2</b><br>(2) 10.0                                                        | <b>n.12.B.1</b><br>(1) 0.0                                                          | <b>n.12.B.2</b><br>(1) 1.4                                                           | <b>c.12.B.1</b><br>(2) 0.0<br>(4) 3.9                                                 | <b>c.12.B.2</b><br>(2) 2.6                                                           |
| n = 12   |  |                                                                                    |  |  |  |                                                                                      |
| (M) – rE | <b>a.12.B.3</b><br>(2) 11.5                                                         |                                                                                    | <b>n.12.B.3</b><br>(1) 4.8                                                          | <b>n.12.B.4</b><br>(1) 5.9                                                           | <b>c.12.B.3</b><br>(2) 3.8                                                            |                                                                                      |

**Figure S5:** Structures, multiplicities (M, in bracket) and relative energies (rE, kcal.mol<sup>-1</sup>) of the low-lying cationic, neutral and anionic ScAl<sub>10</sub><sup>+0/-</sup> and ScAl<sub>11</sub><sup>+0/-</sup> clusters calculated at the PBE/Def2-TZVP+ ZPE method.

|          | Anion                                                                               | Neutral                                                                             | Cation                                                                                |
|----------|-------------------------------------------------------------------------------------|-------------------------------------------------------------------------------------|---------------------------------------------------------------------------------------|
| n = 13   | 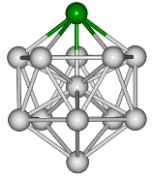   |    |      |
| (M) – rE | <b>a.13.B.1</b><br>(1) 0.0<br>(3) 13.3                                              | <b>a.13.B.2</b><br>(1) 7.1                                                          | <b>n.13.B.1</b><br>(2) 0.0<br><b>n.13.B.2</b><br>(2) 10.4                             |
| n = 13   |  |  |                                                                                       |
| (M) – rE | <b>c.13.B.1</b><br>(1) 0.0                                                          | <b>c.13.B.2</b><br>(1) 1.2                                                          |                                                                                       |
| n = 13   |    |    |     |
| (M) – rE | <b>a.13.B.3</b><br>(1) 22.2                                                         | <b>n.13.B.3</b><br>(2) 15.3                                                         | <b>n.13.B.4</b><br>(2) 19.6                                                           |
| n = 14   |    |    |      |
| (M) – rE | <b>a.14.B.1</b><br>(2) 0.0                                                          | <b>a.14.B.2</b><br>(2) 4.1                                                          | <b>n.14.B.1</b><br>(1) 0.0<br>(3) 4.2                                                 |
| n = 14   |   |  |    |
| (M) – rE | <b>n.14.B.2</b><br>(1) 6.7                                                          | <b>c.14.B.1</b><br>(2) 0.0                                                          | <b>c.14.B.2</b><br>(2) 1.9                                                            |
| n = 14   |  |  |    |
| (M) – rE | <b>a.14.B.3</b><br>(2) 7.2                                                          | <b>a.14.B.4</b><br>(2) 7.7                                                          | <b>n.14.B.3</b><br>(1) 7.4                                                            |
| n = 14   |                                                                                     |                                                                                     |  |
| (M) – rE |                                                                                     |                                                                                     | <b>c.14.B.3</b><br>(2) 2.0                                                            |
| n = 14   |                                                                                     |                                                                                     |  |
| (M) – rE |                                                                                     |                                                                                     | <b>c.14.B.4</b><br>(2) 3.2                                                            |
| n = 14   |                                                                                     |                                                                                     |  |
| (M) – rE |                                                                                     |                                                                                     | <b>c.14.B.5</b><br>(2) 9.0                                                            |

**Figure S6:** Structures, multiplicities (M, in bracket) and relative energies (rE, kcal.mol<sup>-1</sup>) of the low-lying cationic, neutral and anionic ScAl<sub>12</sub><sup>+0/-</sup> and ScAl<sub>13</sub><sup>+0/-</sup> clusters calculated at the PBE/Def2-TZVP+ ZPE method.

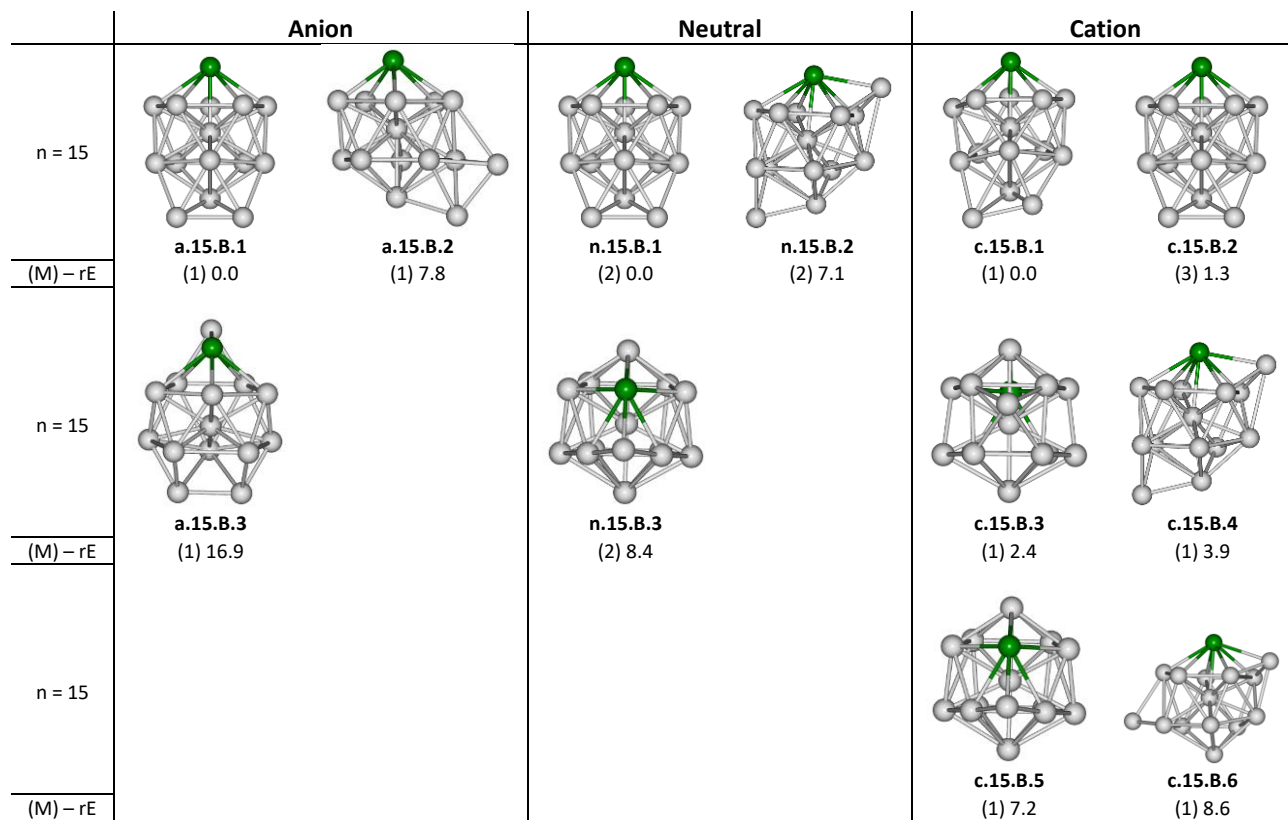

**Figure S7:** Structures, multiplicities (M, in bracket) and relative energies (rE, kcal.mol<sup>-1</sup>) of the low-lying cationic, neutral and anionic ScAl<sub>14</sub><sup>+0/-</sup> clusters calculated at the PBE/ Def2-TZVP+ ZPE method.

|          | Anion                                                                                | Neutral                                                                              | Cation                                                                                |
|----------|--------------------------------------------------------------------------------------|--------------------------------------------------------------------------------------|---------------------------------------------------------------------------------------|
| n = 3    | 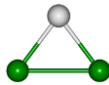    |     |    |
| (M) - rE | <b>a.3.C.1</b><br>(1) 0.0<br>(3) 3.7                                                 | <b>n.3.C.1</b><br>(2) 0.0<br>(4) 3.2                                                 | <b>c.3.C.1</b><br>(1) 0.0<br>(5) 0.0<br>(3) 3.7                                       |
| n = 4    |     |     |    |
| (M) - rE | <b>a.4.C.1</b><br>(4) 0.0<br>(2) 0.1                                                 | <b>n.4.C.1</b><br>(3) 0.0<br>(1) 7.7<br>(5) 11.2                                     | <b>c.4.C.1</b><br>(2) 0.0<br>(4) 1.9                                                  |
| n = 5    |     |     |    |
| (M) - rE | <b>a.5.C.1</b><br>(1) 0.0<br>(3) 1.4                                                 | <b>n.5.C.1</b><br>(4) 0.0<br>(2) 1.2                                                 | <b>c.5.C.1</b><br>(3) 0.0                                                             |
| n = 5    |     |    |    |
| (M) - rE | <b>a.5.C.2</b><br>(3) 3.3                                                            | <b>n.5.C.2</b><br>(2) 0.2<br>(4) 4.8                                                 | <b>c.5.C.2</b><br>(3) 0.7                                                             |
| n = 5    |    |                                                                                      |   |
| (M) - rE | <b>a.5.C.3</b><br>(1) 11.3                                                           |                                                                                      | <b>c.5.C.3</b><br>(1) 1.3                                                             |
| n = 5    |  |                                                                                      |   |
| (M) - rE |                                                                                      |                                                                                      | <b>c.5.C.4</b><br>(3) 1.4                                                             |
| n = 6    |   |   |  |
| (M) - rE | <b>a.6.C.1</b><br>(2) 0.0                                                            | <b>n.6.C.1</b><br>(1) 0.0<br>(3) 5.3                                                 | <b>c.6.C.1</b><br>(2) 0.0<br>(4) 3.1                                                  |
| n = 6    |   |  |  |
| (M) - rE | <b>a.6.C.2</b><br>(2) 0.6                                                            | <b>n.6.C.2</b><br>(3) 6.8                                                            | <b>c.6.C.2</b><br>(2) 11.9<br>(4) 18.0                                                |
| n = 6    |   |                                                                                      |                                                                                       |
| (M) - rE | <b>a.6.C.3</b><br>(2) 2.3                                                            |                                                                                      |                                                                                       |
| n = 6    |   |                                                                                      |                                                                                       |
| (M) - rE | <b>a.6.C.4</b><br>(2) 2.9                                                            |                                                                                      |                                                                                       |

**Figure S8:** Structures, multiplicities (M, in bracket) and relative energies (rE, kcal.mol<sup>-1</sup>) of the low-lying cationic, neutral and anionic Sc<sub>2</sub>Al<sub>n-2</sub><sup>+0/-</sup> clusters with n = 3-6 calculated at the PBE/Def2-TZVP+ ZPE method.

|          | Anion                                                                               |                                                                                     | Neutral                                                                             |                                                                                      | Cation                                                                                |                                                                                       |
|----------|-------------------------------------------------------------------------------------|-------------------------------------------------------------------------------------|-------------------------------------------------------------------------------------|--------------------------------------------------------------------------------------|---------------------------------------------------------------------------------------|---------------------------------------------------------------------------------------|
| n = 7    | 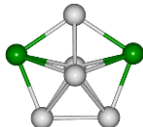   |    |    |    |    |    |
| (M) – rE | <b>a.7.C.1</b><br>(3) 0.0<br>(1) 0.9                                                | <b>a.7.C.2</b><br>(1) 0.5                                                           | <b>n.7.C.1</b><br>(2) 0.0<br>(4) 4.8                                                | <b>n.7.C.2</b><br>(2) 3.9                                                            | <b>c.7.C.1</b><br>(1) 0.0<br>(3) 11.1                                                 | <b>c.7.C.2</b><br>(1) 0.2<br>(3) 6.8                                                  |
| n = 7    |    |    |    |    |    |                                                                                       |
| (M) – rE | <b>a.7.C.3</b><br>(3) 4.8                                                           | <b>a.7.C.4</b><br>(3) 5.0                                                           | <b>n.7.C.3</b><br>(2) 3.9                                                           | <b>n.7.C.4</b><br>(2) 8.7                                                            | <b>c.7.C.3</b><br>(1) 3.7                                                             |                                                                                       |
| n = 8    |    |    |    |    |    |    |
| (M) – rE | <b>a.8.C.1</b><br>(2) 0.0                                                           | <b>a.8.C.2</b><br>(4) 4.4<br>(2) 4.8                                                | <b>n.8.C.1</b><br>(3) 0.0<br>(1) 0.9                                                | <b>n.8.C.2</b><br>(3) 3.1                                                            | <b>c.8.C.1</b><br>(2) 0.0<br>(4) 3.2                                                  | <b>c.8.C.2</b><br>(4) 8.2                                                             |
| n = 8    |   |  |  |  |  |  |
| (M) – rE | <b>a.8.C.3</b><br>(2) 4.7                                                           | <b>a.8.C.3</b><br>(2) 4.8                                                           | <b>n.8.C.3</b><br>(1) 4.1                                                           | <b>n.8.C.4</b><br>(3) 4.7                                                            | <b>c.8.C.3</b><br>(2) 8.4<br>(4) 11.6                                                 | <b>c.8.C.4</b><br>(2) 11.3                                                            |
| n = 8    |  |                                                                                     |  |                                                                                      |                                                                                       |                                                                                       |
| (M) – rE | <b>a.8.C.5</b><br>(2) 5.0                                                           |                                                                                     | <b>n.8.C.5</b><br>(1) 5.8                                                           |                                                                                      |                                                                                       |                                                                                       |

**Figure S9:** Structures, multiplicities (M, in bracket) and relative energies (rE, kcal.mol<sup>-1</sup>) of the low-lying cationic, neutral and anionic Sc<sub>2</sub>Al<sub>5</sub><sup>+0/-</sup> and Sc<sub>2</sub>Al<sub>6</sub><sup>+0/-</sup> clusters calculated at the PBE/Def2-TZVP+ ZPE method.

|          | Anion                                                                               |                                                                                     | Neutral                                                                             |                                                                                      | Cation                                                                                |                                                                                       |
|----------|-------------------------------------------------------------------------------------|-------------------------------------------------------------------------------------|-------------------------------------------------------------------------------------|--------------------------------------------------------------------------------------|---------------------------------------------------------------------------------------|---------------------------------------------------------------------------------------|
| n = 9    | 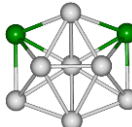   |    |    |    |    |    |
| (M) – rE | a.9.C.1<br>(1) 0.0                                                                  | a.9.C.2<br>(1) 0.7<br>(3) 3.7                                                       | n.9.C.1<br>(2) 0.0                                                                  | n.9.C.2<br>(2) 0.4                                                                   | c.9.C.1<br>(1) 0.0<br>(3) 1.2                                                         | c.9.C.2<br>(3) 1.5<br>(1) 3.3                                                         |
| n = 9    |    |    |    |    |    |    |
| (M) – rE | a.9.C.3<br>(1) 1.1                                                                  | a.9.C.4<br>(1) 2.5                                                                  | n.9.C.3<br>(2) 3.3                                                                  | n.9.C.4<br>(2) 3.6                                                                   | c.9.C.3<br>(3) 2.5                                                                    | c.9.C.4<br>(3) 2.5                                                                    |
| n = 9    |    |                                                                                     |    |    |                                                                                       |                                                                                       |
| (M) – rE | a.9.C.5<br>(1) 2.9                                                                  |                                                                                     | n.9.C.5<br>(2) 4.0                                                                  | n.9.C.6<br>(2) 4.1                                                                   |                                                                                       |                                                                                       |
| n = 10   |   |   |   |   |   |   |
| (M) – rE | a.10.C.1<br>(2) 0.0<br>(4) 4.8                                                      | a.10.C.2<br>(2) 1.9<br>(4) 8.1                                                      | n.10.C.1<br>(1) 0.0<br>(3) 1.8                                                      | n.10.C.2<br>(1) 0.9                                                                  | c.10.C.1<br>(2) 0.0                                                                   | c.10.C.2<br>(1) 3.3<br>(2) 3.3                                                        |
| n = 10   |  |  |  |  |  |  |
| (M) – rE | a.10.C.3<br>(2) 5.5                                                                 | a.10.C.4<br>(2) 6.2                                                                 | n.10.C.3<br>(3) 2.6                                                                 | n.10.C.4<br>(3) 3.4                                                                  | c.10.C.3<br>(2) 4.6                                                                   | c.10.C.4<br>(2) 4.7                                                                   |
| n = 10   |                                                                                     |                                                                                     |  |                                                                                      |  |  |
| (M) – rE |                                                                                     |                                                                                     | n.10.C.5<br>(1) 3.9                                                                 |                                                                                      | c.10.C.5<br>(2) 5.3                                                                   | c.10.C.6<br>(2) 6.1                                                                   |

**Figure S10:** Structures, multiplicities (M, in bracket) and relative energies (rE, kcal.mol<sup>-1</sup>) of the low-lying cationic, neutral and anionic Sc<sub>2</sub>Al<sub>7</sub><sup>+0/-</sup> and Sc<sub>2</sub>Al<sub>8</sub><sup>+0/-</sup> clusters calculated at the PBE/Def2-TZVP+ ZPE method.

|          | Anion                                                                             |                                                                                   | Neutral                                                                           |                                                                                    | Cation                                                                              |                                                                                     |
|----------|-----------------------------------------------------------------------------------|-----------------------------------------------------------------------------------|-----------------------------------------------------------------------------------|------------------------------------------------------------------------------------|-------------------------------------------------------------------------------------|-------------------------------------------------------------------------------------|
| n = 11   | 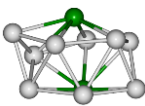 |  |  |  |  |  |
| (M) – rE | <b>a.11.C.1</b><br>(1) 0.0                                                        | <b>a.11.C.2</b><br>(1) 0.1<br>(3) 4.0                                             | <b>n.11.C.1</b><br>(2) 0.0                                                        | <b>n.11.C.2</b><br>(2) 2.0                                                         | <b>c.11.C.1</b><br>(1) 0.0<br>(3) 3.9                                               | <b>c.11.C.2</b><br>(1) 0.9                                                          |
| n = 11   |  |  |  |  |  |  |
| (M) – rE | <b>a.11.C.3</b><br>(1) 0.4                                                        | <b>a.11.C.4</b><br>(1) 6.3                                                        | <b>n.11.C.3</b><br>(2) 2.5                                                        | <b>n.11.C.4</b><br>(2) 5.1                                                         | <b>c.11.C.3</b><br>(1) 1.6                                                          | <b>c.11.C.4</b><br>(1) 2.2                                                          |
| n = 11   |  |                                                                                   |  |  |  |                                                                                     |
| (M) – rE | <b>a.11.C.5</b><br>(3) 6.8                                                        |                                                                                   | <b>n.11.C.5</b><br>(2) 5.6                                                        | <b>n.11.C.6</b><br>(2) 8.5                                                         | <b>c.11.C.5</b><br>(1) 3.5                                                          |                                                                                     |

**Figure S11:** Structures, multiplicities (M, in bracket) and relative energies (rE, kcal.mol<sup>-1</sup>) of the low-lying cationic, neutral and anionic Sc<sub>2</sub>Al<sub>9</sub><sup>+0/-</sup> clusters calculated at the PBE/ Def2-TZVP+ ZPE method.

|          | Anion                                                                               |                                                                                     | Neutral                                                                             |                                                                                      | Cation                                                                                |                                                                                       |
|----------|-------------------------------------------------------------------------------------|-------------------------------------------------------------------------------------|-------------------------------------------------------------------------------------|--------------------------------------------------------------------------------------|---------------------------------------------------------------------------------------|---------------------------------------------------------------------------------------|
| n = 12   | 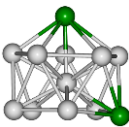   |    |    |    |    |    |
| (M) – rE | a.12.C.1<br>(2) 0.0                                                                 | a.12.C.2<br>(2) 0.6<br>(4) 11.0                                                     | n.12.C.1<br>(1) 0.0                                                                 | n.12.C.2<br>(1) 4.0                                                                  | c.12.C.1<br>(2) 0.0                                                                   | c.12.C.2<br>(2) 1.2                                                                   |
| n = 12   |    |    |    |    |    |    |
| (M) – rE | a.12.C.3<br>(2) 0.9                                                                 | a.12.C.4<br>(2) 7.0                                                                 | n.12.C.3<br>(1) 4.1                                                                 | n.12.C.4<br>(1) 7.2                                                                  | c.12.C.3<br>(2) 4.1                                                                   | c.12.C.4<br>(2) 6.3                                                                   |
| n = 12   |    |    |    |    |    |    |
| (M) – rE | a.12.C.5<br>(2) 7.4                                                                 | a.12.C.6<br>(2) 8.1                                                                 | n.12.C.5<br>(1) 7.4                                                                 | n.12.C.6<br>(1) 7.6                                                                  | c.12.C.5<br>(2) 6.3                                                                   | c.12.C.6<br>(2) 7.0                                                                   |
| n = 12   |   |                                                                                     |   |   |   |   |
| (M) – rE | a.12.C.7<br>(2) 10.9                                                                |                                                                                     | n.12.C.7<br>(3) 8.3                                                                 | n.12.C.8<br>(1) 9.7                                                                  | c.12.C.7<br>(2) 7.0                                                                   | c.12.C.8<br>(2) 8.3                                                                   |
| n = 13   |  |  |  |  |  |  |
| (M) – rE | a.13.C.1<br>(1) 0.0<br>(3) 8.7                                                      | a.13.C.2<br>(1) 6.0                                                                 | n.13.C.1<br>(2) 0.0                                                                 | n.13.C.2<br>(2) 0.2                                                                  | c.13.C.1<br>(1) 0.0<br>(3) 8.0                                                        | c.13.C.2<br>(1) 7.4                                                                   |
| n = 13   |  |                                                                                     |  |  |  |  |
| (M) – rE | a.13.C.3<br>(3) 11.0<br>(1) 15.2                                                    |                                                                                     | n.13.C.3<br>(2) 6.5<br>(4) 16.8                                                     | n.13.C.4<br>(2) 14.7                                                                 | c.13.C.3<br>(1) 8.1                                                                   | c.13.C.4<br>(1) 14.9                                                                  |

**Figure S12:** Structures, multiplicities (M, in bracket) and relative energies (rE, kcal.mol<sup>-1</sup>) of the low-lying cationic, neutral and anionic Sc<sub>2</sub>Al<sub>10</sub><sup>+0/-</sup> and Sc<sub>2</sub>Al<sub>11</sub><sup>+0/-</sup> clusters calculated at the PBE/Def2-TZVP+ ZPE method.

|          | Anion                                                                               |                                                                                     | Neutral                                                                             |                                                                                      | Cation                                                                                |                                                                                       |
|----------|-------------------------------------------------------------------------------------|-------------------------------------------------------------------------------------|-------------------------------------------------------------------------------------|--------------------------------------------------------------------------------------|---------------------------------------------------------------------------------------|---------------------------------------------------------------------------------------|
| n = 14   | 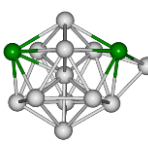   |    |    |    |    |    |
| (M) – rE | a.14.C.1<br>(2) 0.0                                                                 | a.14.C.2<br>(2) 4.4                                                                 | n.14.C.1<br>(1) 0.0                                                                 | n.14.C.2<br>(1) 3.1                                                                  | c.14.C.1<br>(2) 0.0                                                                   | c.14.C.2<br>(2) 4.2                                                                   |
| n = 14   |    |    |    |    |    |    |
| (M) – rE | a.14.C.3<br>(2) 10.3                                                                | a.14.C.4<br>(2) 12.3                                                                | n.14.C.3<br>(1) 3.6                                                                 | n.14.C.4<br>(1) 4.0                                                                  | c.14.C.3<br>(2) 6.3                                                                   | c.14.C.4<br>(2) 7.0                                                                   |
| n = 14   |                                                                                     |                                                                                     |    |    |    |    |
| (M) – rE |                                                                                     |                                                                                     | n.14.C.5<br>(1) 6.4                                                                 | n.14.C.6<br>(1) 6.4                                                                  | c.14.C.5<br>(2) 7.1                                                                   | c.14.C.6<br>(2) 7.9                                                                   |
| n = 15   |   |   |   |   |   |   |
| (M) – rE | a.15.C.1<br>(1) 0.0<br>(3) 4.4                                                      | a.15.C.2<br>(1) 5.6                                                                 | n.15.C.1<br>(2) 0.0                                                                 | n.15.C.2<br>(2) 4.1                                                                  | c.15.C.1<br>(1) 0.0<br>(3) 3.2                                                        | c.15.C.2<br>(1) 0.4                                                                   |
| n = 15   |  |  |  |  |  |  |
| (M) – rE | a.15.C.3<br>(1) 8.2                                                                 | a.15.C.4<br>(1) 10.4                                                                | n.15.C.3<br>(2) 7.8                                                                 | n.15.C.4<br>(2) 8.8                                                                  | c.15.C.3<br>(1) 2.8                                                                   | c.15.C.4<br>(1) 3.0                                                                   |
| n = 15   |  |                                                                                     |  |                                                                                      |  |                                                                                       |
| (M) – rE | a.15.C.5<br>(1) 17.2                                                                |                                                                                     | n.15.C.5<br>(2) 9.8                                                                 |                                                                                      | c.15.C.5<br>(2) 3.0                                                                   |                                                                                       |

**Figure S13:** Structures, multiplicities (M, in bracket) and relative energies (rE, kcal.mol<sup>-1</sup>) of the low-lying cationic, neutral and anionic Sc<sub>2</sub>Al<sub>12</sub><sup>+0/-</sup> and Sc<sub>2</sub>Al<sub>13</sub><sup>+0/-</sup> clusters calculated at the PBE/Def2-TZVP+ ZPE method.

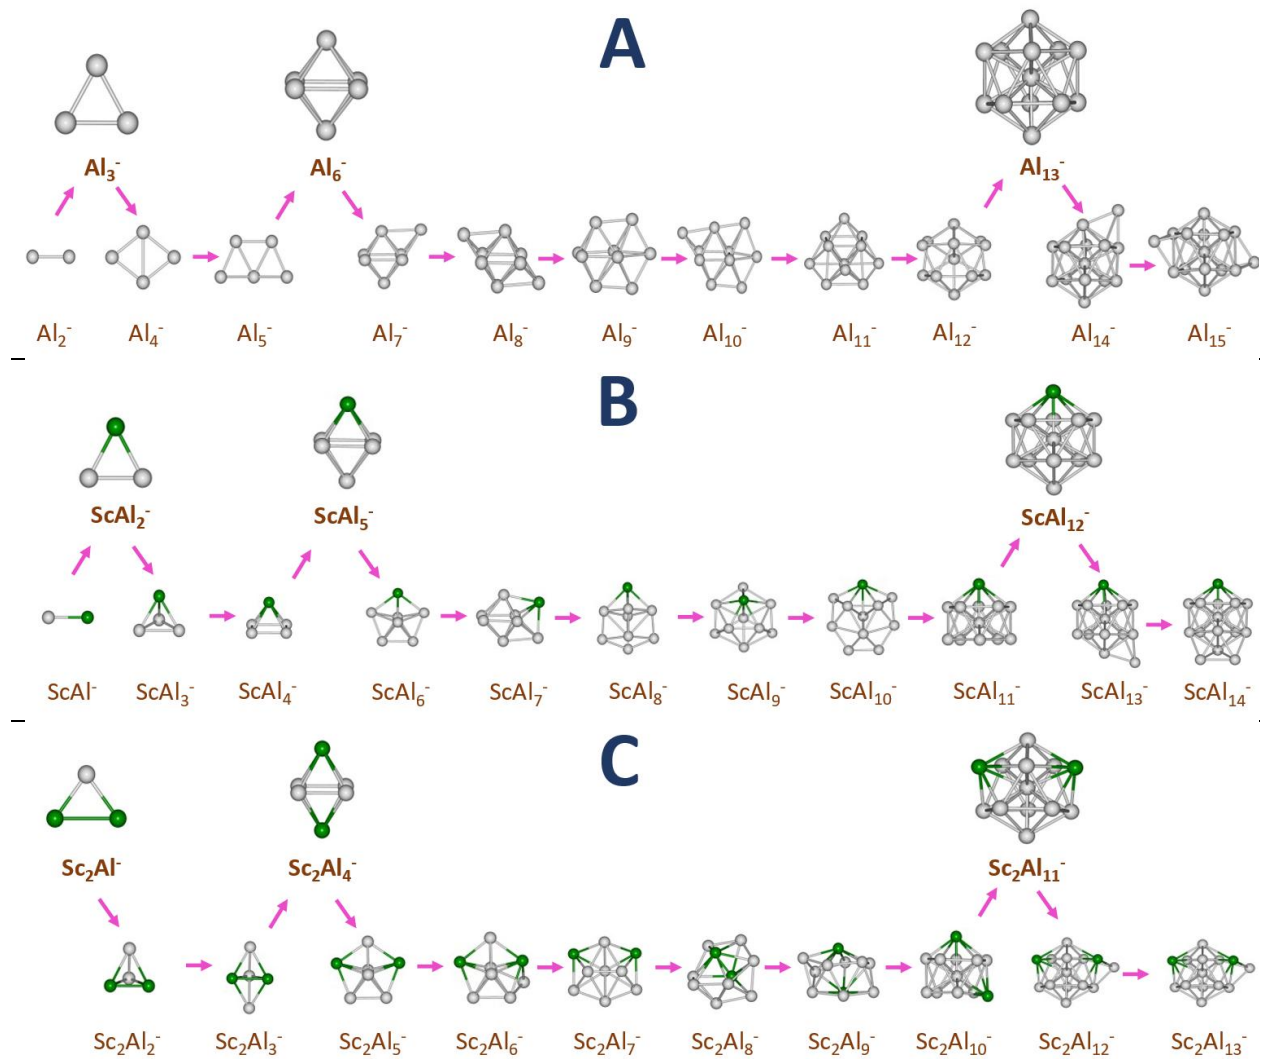

**Figure S14:** Structural evolution of the anionic **A)**  $\text{Al}_n^-$ , **B)**  $\text{ScAl}_{n-1}^-$  and **C)**  $\text{Sc}_2\text{Al}_{n-2}^-$  clusters with  $n = 3-15$ .

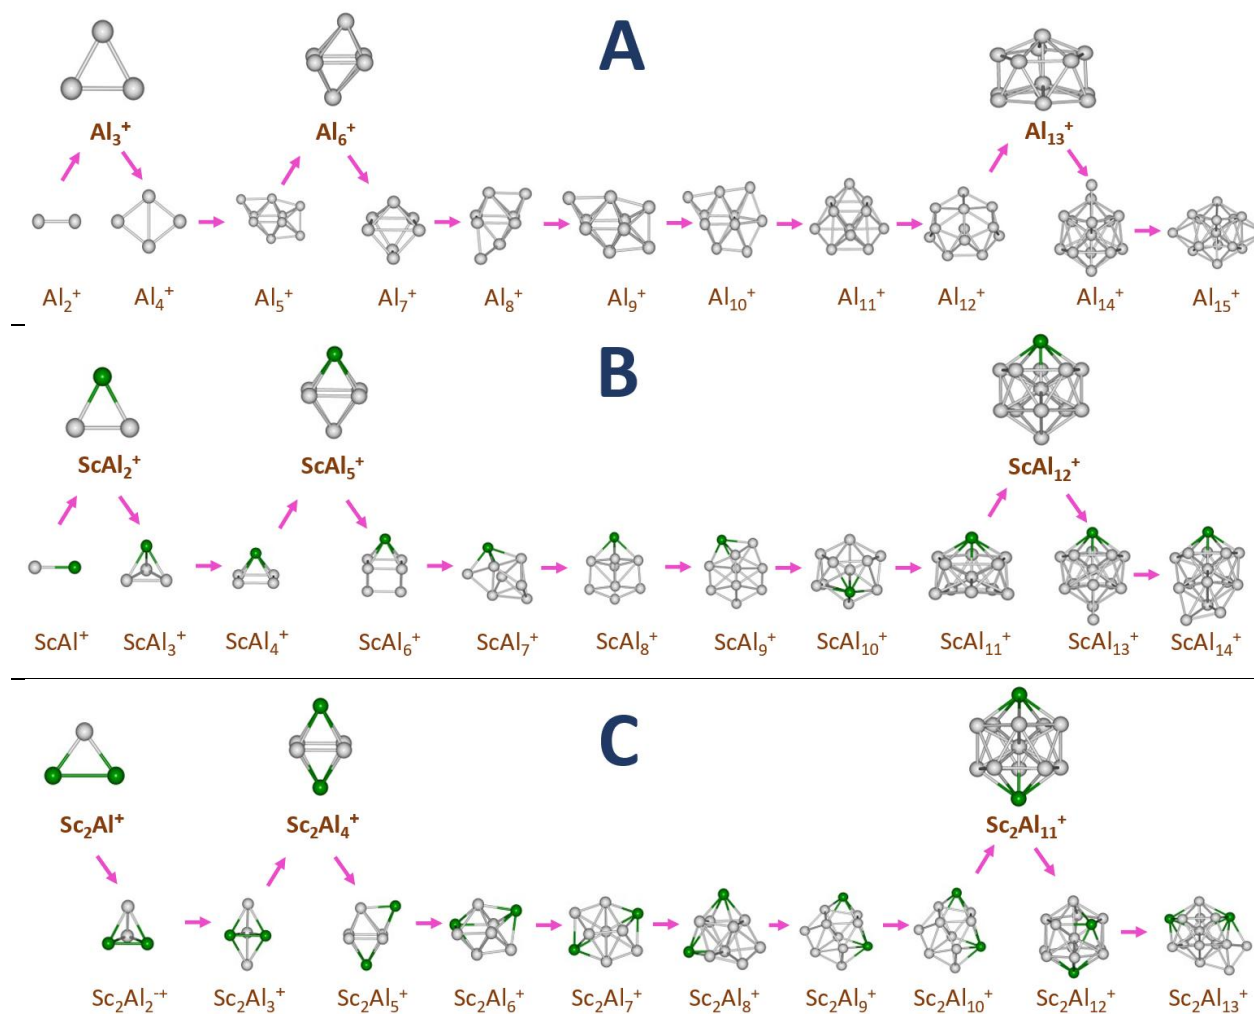

**Figure S15:** Structural evolution of the cationic **A)**  $\text{Al}_n^+$ , **B)**  $\text{ScAl}_{n-1}^+$  and **C)**  $\text{Sc}_2\text{Al}_{n-2}^+$  clusters with  $n = 3-15$ .

**Table S1:** Average binding energy values ( $E_b$ , eV) of the anionic and cationic  $\text{ScAl}_{n-1}^{+/-}$  clusters ( $n = 2-15$ ) calculated at the PBE/def2-TZVP level.

| Isomer   | $E_b$<br>(Al <sup>-</sup> ) | $E_b$<br>(Sc <sup>-</sup> ) | Isomer   | $E_b$<br>(Al <sup>+</sup> ) | $E_b$<br>(Sc <sup>+</sup> ) |
|----------|-----------------------------|-----------------------------|----------|-----------------------------|-----------------------------|
| a.2.B.1  | 1.24                        | 1.30                        | c.2.B.1  | 1.01                        | 1.12                        |
| a.3.B.1  | 1.86                        | 1.90                        | c.3.B.1  | 1.48                        | 1.56                        |
| a.4.B.1  | 2.07                        | 2.10                        | c.4.B.1  | 1.80                        | 1.86                        |
| a.5.B.1  | 2.33                        | 2.35                        | c.5.B.1  | 2.08                        | 2.12                        |
| a.6.B.1  | 2.41                        | 2.43                        | c.6.B.1  | 2.12                        | 2.16                        |
| a.7.B.1  | 2.53                        | 2.55                        | c.7.B.1  | 2.37                        | 2.40                        |
| a.8.B.1  | 2.56                        | 2.57                        | c.8.B.1  | 2.40                        | 2.43                        |
| a.9.B.1  | 2.65                        | 2.66                        | c.9.B.1  | 2.45                        | 2.48                        |
| a.10.B.1 | 2.65                        | 2.66                        | c.10.B.1 | 2.49                        | 2.51                        |
| a.11.B.1 | 2.70                        | 2.71                        | c.11.B.1 | 2.54                        | 2.56                        |
| a.12.B.1 | 2.75                        | 2.76                        | c.12.B.1 | 2.59                        | 2.61                        |
| a.13.B.1 | 2.85                        | 2.86                        | c.13.B.1 | 2.68                        | 2.69                        |
| a.14.B.1 | 2.83                        | 2.83                        | c.14.B.1 | 2.72                        | 2.74                        |
| a.15.B.1 | 2.84                        | 2.85                        | c.15.B.1 | 2.72                        | 2.73                        |

**Table S2:** Average binding energy values ( $E_b$ , eV) of the anionic and cationic  $\text{Sc}_2\text{Al}_{n-2}^{+/-}$  clusters ( $n = 3-15$ ) calculated at the PBE/def2-TZVP level.

| Isomer   | $E_b$<br>(Al <sup>-</sup> ) | $E_b$<br>(Sc <sup>-</sup> ) | Isomer   | $E_b$<br>(Al <sup>+</sup> ) | $E_b$<br>(Sc <sup>+</sup> ) |
|----------|-----------------------------|-----------------------------|----------|-----------------------------|-----------------------------|
| a.3.C.1  | 1.76                        | 1.80                        | c.3.C.1  | 1.59                        | 1.67                        |
| a.4.C.1  | 2.15                        | 2.18                        | c.4.C.1  | 2.02                        | 2.07                        |
| a.5.C.1  | 2.33                        | 2.35                        | c.5.C.1  | 2.12                        | 2.17                        |
| a.6.C.1  | 2.44                        | 2.47                        | c.6.C.1  | 2.38                        | 2.42                        |
| a.7.C.1  | 2.58                        | 2.60                        | c.7.C.1  | 2.44                        | 2.48                        |
| a.8.C.1  | 2.63                        | 2.64                        | c.8.C.1  | 2.54                        | 2.57                        |
| a.9.C.1  | 2.67                        | 2.68                        | c.9.C.1  | 2.55                        | 2.57                        |
| a.10.C.1 | 2.71                        | 2.73                        | c.10.C.1 | 2.60                        | 2.62                        |
| a.11.C.1 | 2.76                        | 2.77                        | c.11.C.1 | 2.62                        | 2.65                        |
| a.12.C.1 | 2.79                        | 2.81                        | c.12.C.1 | 2.68                        | 2.70                        |
| a.13.C.1 | 2.89                        | 2.90                        | c.13.C.1 | 2.79                        | 2.81                        |
| a.14.C.1 | 2.87                        | 2.88                        | c.14.C.1 | 2.79                        | 2.81                        |
| a.15.C.1 | 2.89                        | 2.90                        | c.15.C.1 | 2.79                        | 2.81                        |

**Table S3.** Dissociation Energies ( $D_e$ , eV) for Various Fragmentation Channels of  $\text{ScAl}_{n-1}$  clusters at three charge states ( $n = 3-15$ ), calculated at the PBE/def2-TZVP level.\*

| n  | $\text{ScAl}_{n-1}$ |          | $\text{ScAl}_{n-1}^-$ |          |          |          | $\text{ScAl}_{n-1}^+$ |          |          |           |
|----|---------------------|----------|-----------------------|----------|----------|----------|-----------------------|----------|----------|-----------|
|    | $D_e(1)$            | $D_e(2)$ | $D_e(3)$              | $D_e(4)$ | $D_e(5)$ | $D_e(6)$ | $D_e(7)$              | $D_e(8)$ | $D_e(9)$ | $D_e(10)$ |
| 3  | 2.73                | 2.71     | 4.04                  | 2.71     | 3.89     | 3.10     | 3.01                  | 3.21     | 2.76     | 2.42      |
| 4  | 3.02                | 2.72     | 4.32                  | 2.77     | 3.89     | 2.71     | 3.33                  | 3.45     | 2.80     | 2.76      |
| 5  | 4.09                | 3.10     | 5.64                  | 3.40     | 4.52     | 3.35     | 4.49                  | 4.41     | 3.27     | 3.19      |
| 6  | 3.60                | 2.39     | 5.57                  | 3.57     | 4.24     | 2.82     | 3.94                  | 4.04     | 2.51     | 2.33      |
| 7  | 3.91                | 3.43     | 5.75                  | 3.33     | 5.14     | 3.30     | 4.67                  | 4.96     | 3.96     | 3.84      |
| 8  | 3.10                | 2.67     | 4.99                  | 2.96     | 4.43     | 2.72     | 3.81                  | 3.32     | 3.15     | 2.63      |
| 9  | 3.74                | 3.03     | 5.98                  | 3.95     | 5.14     | 3.38     | 4.32                  | 4.23     | 3.37     | 2.89      |
| 10 | 3.80                | 2.84     | 5.87                  | 3.33     | 4.77     | 2.66     | 4.35                  | 4.14     | 3.16     | 2.81      |
| 11 | 3.98                | 2.97     | 6.26                  | 3.78     | 5.12     | 3.18     | 4.57                  | 4.48     | 3.32     | 3.01      |
| 12 | 4.18                | 3.27     | 6.54                  | 3.96     | 5.50     | 3.35     | 4.68                  | 4.57     | 3.54     | 3.19      |
| 13 | 4.86                | 3.82     | 7.36                  | 4.86     | 6.19     | 3.96     | 5.25                  | 5.01     | 3.98     | 3.70      |
| 14 | 3.94                | 2.87     | 6.12                  | 2.85     | 4.92     | 2.56     | 4.74                  | 4.47     | 3.44     | 3.29      |
| 15 | 3.84                | 2.82     | 6.29                  | 3.86     | 5.14     | 3.08     | 4.51                  | 3.95     | 3.26     | 2.70      |

(\*)

For neutral : (1)  $\text{ScAl}_{n-1} \rightarrow \text{Al}_{n-1} + \text{Sc}$ ; (2)  $\text{ScAl}_{n-1} \rightarrow \text{ScAl}_{n-2} + \text{Al}$ ;

For anion : (3)  $\text{ScAl}_{n-1}^- \rightarrow \text{Al}_{n-1} + \text{Sc}^-$ ; (4)  $\text{ScAl}_{n-1}^- \rightarrow \text{Al}_{n-1}^- + \text{Sc}$ ;

(5)  $\text{ScAl}_{n-1}^- \rightarrow \text{ScAl}_{n-2} + \text{Al}^-$ ; (6)  $\text{ScAl}_{n-1}^- \rightarrow \text{ScAl}_{n-2}^- + \text{Al}$ ;

For cation : (7)  $\text{ScAl}_{n-1}^+ \rightarrow \text{Al}_{n-1} + \text{Sc}^+$ ; (8)  $\text{ScAl}_{n-1}^+ \rightarrow \text{Al}_{n-1}^+ + \text{Sc}$ ;

(9)  $\text{ScAl}_{n-1}^+ \rightarrow \text{ScAl}_{n-2} + \text{Al}^+$ ; (10)  $\text{ScAl}_{n-1}^+ \rightarrow \text{ScAl}_{n-2}^+ + \text{Al}$ ;

**Table S4.** Dissociation Energies ( $D_e$ , eV) for Various Fragmentation Channels of  $\text{Sc}_2\text{Al}_{n-2}$  clusters at three charge states ( $n = 3-15$ ), calculated at the PBE/def2-TZVP level.\*

| n  | $\text{Sc}_2\text{Al}_{n-2}$ |           | $\text{Sc}_2\text{Al}_{n-2}^-$ |           |           |           | $\text{Sc}_2\text{Al}_{n-2}^+$ |           |           |           |
|----|------------------------------|-----------|--------------------------------|-----------|-----------|-----------|--------------------------------|-----------|-----------|-----------|
|    | $D_e(11)$                    | $D_e(12)$ | $D_e(13)$                      | $D_e(14)$ | $D_e(15)$ | $D_e(16)$ | $D_e(17)$                      | $D_e(18)$ | $D_e(19)$ | $D_e(20)$ |
| 3  | 2.60                         | 2.64      | 3.72                           | 2.80      | 3.64      | 3.01      | 3.33                           | 2.76      | 3.15      | 2.21      |
| 4  | 3.23                         | 3.34      | 4.32                           | 3.02      | 4.31      | 3.32      | 3.90                           | 3.63      | 3.79      | 3.29      |
| 5  | 3.05                         | 2.54      | 4.64                           | 3.35      | 4.01      | 3.04      | 3.72                           | 3.41      | 2.98      | 2.54      |
| 6  | 3.24                         | 3.29      | 4.58                           | 3.03      | 4.50      | 3.04      | 4.28                           | 3.88      | 4.09      | 3.66      |
| 7  | 3.82                         | 2.97      | 5.57                           | 3.60      | 4.59      | 3.38      | 4.73                           | 4.39      | 3.65      | 2.84      |
| 8  | 3.38                         | 3.00      | 5.13                           | 3.28      | 4.61      | 2.99      | 4.51                           | 3.75      | 3.89      | 3.21      |
| 9  | 3.56                         | 2.85      | 5.44                           | 3.55      | 4.60      | 2.99      | 4.46                           | 3.75      | 3.52      | 2.63      |
| 10 | 3.50                         | 2.97      | 5.52                           | 3.28      | 4.86      | 3.11      | 4.47                           | 3.89      | 3.70      | 3.04      |
| 11 | 3.79                         | 3.12      | 5.93                           | 3.87      | 5.14      | 3.25      | 4.52                           | 3.97      | 3.62      | 2.89      |
| 12 | 4.05                         | 3.23      | 6.13                           | 3.85      | 5.18      | 3.16      | 4.82                           | 4.23      | 3.77      | 3.27      |
| 13 | 4.64                         | 3.86      | 6.84                           | 4.48      | 5.94      | 3.98      | 5.73                           | 5.22      | 4.72      | 4.18      |
| 14 | 3.61                         | 2.80      | 5.68                           | 3.19      | 4.74      | 2.66      | 4.72                           | 4.33      | 3.67      | 2.81      |
| 15 | 3.78                         | 3.04      | 6.01                           | 3.83      | 5.14      | 3.20      | 4.63                           | 3.83      | 3.65      | 2.78      |

(\*)

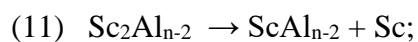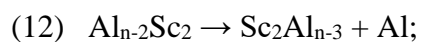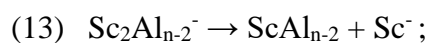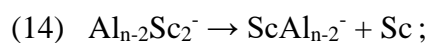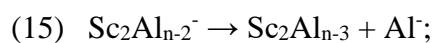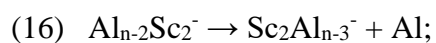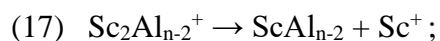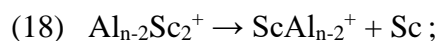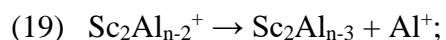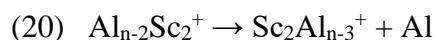

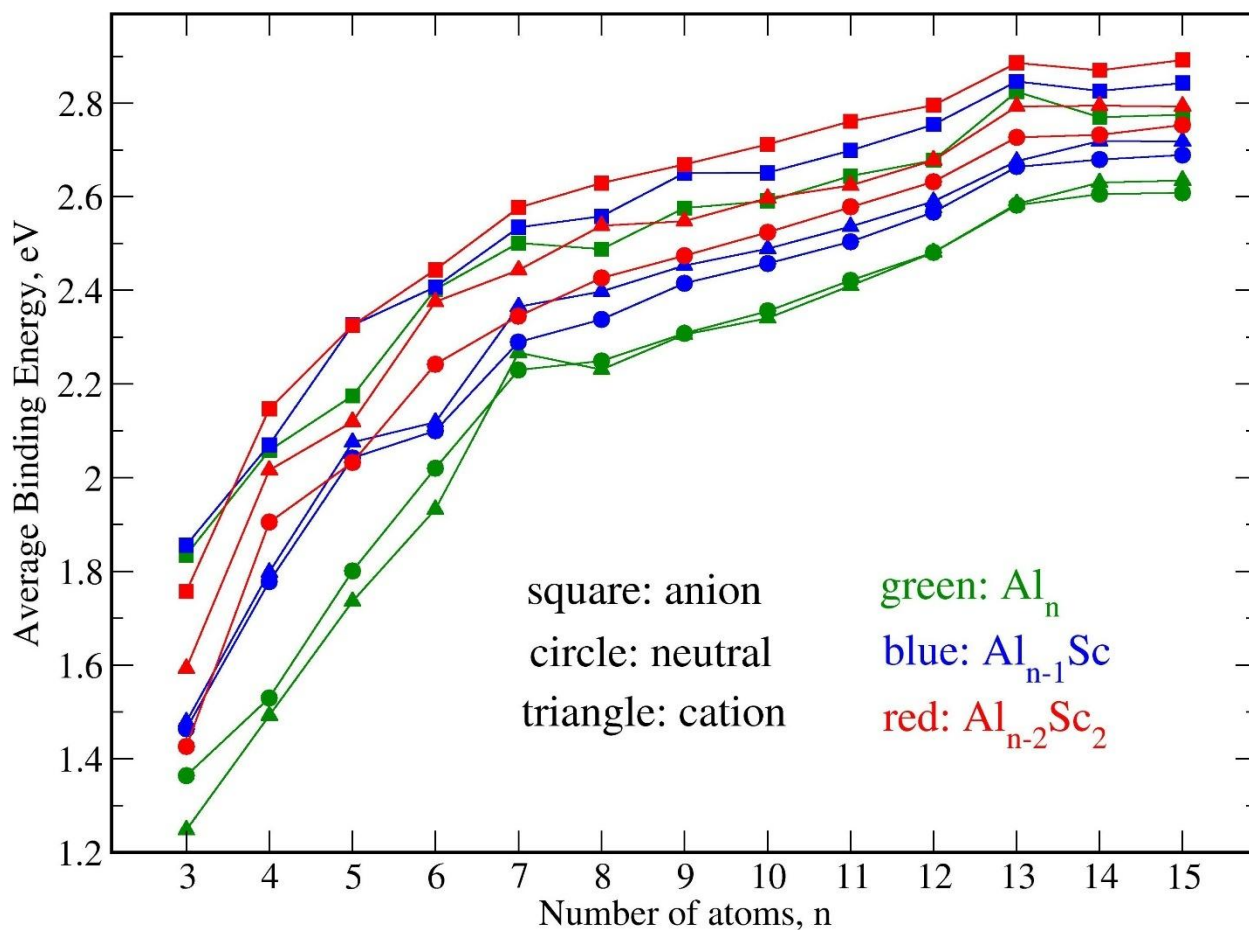

**Figure S16:** Average binding energies of the anionic, neutral and cationic  $\text{Al}_n^{+/0/-}$ ,  $\text{ScAl}_{n-1}^{+/0/-}$  and  $\text{Sc}_2\text{Al}_{n-2}^{+/0/-}$  clusters ( $n = 3-15$ ).

**Table S5:** Natural Electron Configuration (NEC) and Natural Charge of **da.6.A.1**, **a.6.A.1**, **n.6.A.1** and **c.6.A.1** isomers at their most stable spin state.

| Isomers                                                                                                          | Atom's number | Natural Charge | Natural Electron Configuration |                             |
|------------------------------------------------------------------------------------------------------------------|---------------|----------------|--------------------------------|-----------------------------|
| 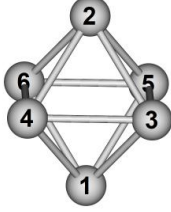<br><b>da.6.A.1</b><br>singlet  | 1             | Al             | -0.33                          | 3S( 1.42)3p( 1.85)3d( 0.04) |
|                                                                                                                  | 2             | Al             | -0.33                          | 3S( 1.42)3p( 1.85)3d( 0.04) |
|                                                                                                                  | 3             | Al             | -0.33                          | 3S( 1.42)3p( 1.85)3d( 0.04) |
|                                                                                                                  | 4             | Al             | -0.33                          | 3S( 1.42)3p( 1.85)3d( 0.04) |
|                                                                                                                  | 5             | Al             | -0.33                          | 3S( 1.42)3p( 1.85)3d( 0.04) |
|                                                                                                                  | 6             | Al             | -0.33                          | 3S( 1.42)3p( 1.85)3d( 0.04) |
| <br><b>a.6.A.1</b><br>doublet   | 1             | Al             | -0.17                          | 3S( 1.47)3p( 1.63)3d( 0.05) |
|                                                                                                                  | 2             | Al             | -0.17                          | 3S( 1.47)3p( 1.63)3d( 0.05) |
|                                                                                                                  | 3             | Al             | -0.17                          | 3S( 1.47)3p( 1.63)3d( 0.05) |
|                                                                                                                  | 4             | Al             | -0.17                          | 3S( 1.47)3p( 1.63)3d( 0.05) |
|                                                                                                                  | 5             | Al             | -0.17                          | 3S( 1.47)3p( 1.63)3d( 0.05) |
|                                                                                                                  | 6             | Al             | -0.17                          | 3S( 1.47)3p( 1.63)3d( 0.05) |
| <br><b>n.6.A.1</b><br>singlet | 1             | Al             | 0.00                           | 3S( 1.51)3p( 1.42)3d( 0.06) |
|                                                                                                                  | 2             | Al             | 0.00                           | 3S( 1.51)3p( 1.42)3d( 0.06) |
|                                                                                                                  | 3             | Al             | 0.00                           | 3S( 1.51)3p( 1.42)3d( 0.06) |
|                                                                                                                  | 4             | Al             | 0.00                           | 3S( 1.51)3p( 1.42)3d( 0.06) |
|                                                                                                                  | 5             | Al             | 0.00                           | 3S( 1.51)3p( 1.42)3d( 0.06) |
|                                                                                                                  | 6             | Al             | 0.00                           | 3S( 1.51)3p( 1.42)3d( 0.06) |
| <br><b>c.6.A.1</b><br>doublet | 1             | Al             | 0.20                           | 3S( 1.53)3p( 1.19)3d( 0.06) |
|                                                                                                                  | 2             | Al             | 0.20                           | 3S( 1.53)3p( 1.19)3d( 0.06) |
|                                                                                                                  | 3             | Al             | 0.09                           | 3S( 1.56)3p( 1.26)3d( 0.07) |
|                                                                                                                  | 4             | Al             | 0.20                           | 3S( 1.53)3p( 1.19)3d( 0.06) |
|                                                                                                                  | 5             | Al             | 0.20                           | 3S( 1.53)3p( 1.19)3d( 0.06) |
|                                                                                                                  | 6             | Al             | 0.09                           | 3S( 1.56)3p( 1.26)3d( 0.07) |

**Table S6:** Natural Electron Configuration (NEC) and Natural Charge of **da.6.B.1**, **a.6.B.1**, **n.6.B.1** and **c.6.B.2** isomers at their most stable spin state.

| Isomers                                                                                                               | Atom's number |    | Natural Charge | Natural Electron Configuration |
|-----------------------------------------------------------------------------------------------------------------------|---------------|----|----------------|--------------------------------|
| 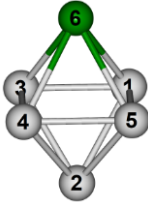 <p><b>da.6.B.1</b><br/>singlet</p>  | 1             | Al | -0.26          | 3S( 1.39)3p( 1.83)3d( 0.03)    |
|                                                                                                                       | 2             | Al | -0.36          | 3S( 1.44)3p( 1.88)3d( 0.03)    |
|                                                                                                                       | 3             | Al | -0.26          | 3S( 1.39)3p( 1.83)3d( 0.03)    |
|                                                                                                                       | 4             | Al | -0.26          | 3S( 1.39)3p( 1.83)3d( 0.03)    |
|                                                                                                                       | 5             | Al | -0.26          | 3S( 1.39)3p( 1.83)3d( 0.03)    |
|                                                                                                                       | 6             | Sc | -0.58          | 4S( 1.19)3d( 1.80)4p( 0.52)    |
|  <p><b>a.6.B.1</b><br/>doublet</p>   | 1             | Al | -0.12          | 3S( 1.42)3p( 1.65)3d( 0.04)    |
|                                                                                                                       | 2             | Al | -0.11          | 3S( 1.57)3p( 1.51)3d( 0.03)    |
|                                                                                                                       | 3             | Al | -0.12          | 3S( 1.42)3p( 1.65)3d( 0.04)    |
|                                                                                                                       | 4             | Al | -0.11          | 3S( 1.42)3p( 1.64)3d( 0.04)    |
|                                                                                                                       | 5             | Al | -0.11          | 3S( 1.42)3p( 1.64)3d( 0.04)    |
|                                                                                                                       | 6             | Sc | -0.42          | 4S( 1.02)3d( 1.95)4p( 0.42)    |
|  <p><b>n.6.B.1</b><br/>triplet</p>  | 1             | Al | 0.05           | 3S( 1.41)3p( 1.50)3d( 0.04)    |
|                                                                                                                       | 2             | Al | 0.03           | 3S( 1.38)3p( 1.53)3d( 0.04)    |
|                                                                                                                       | 3             | Al | 0.05           | 3S( 1.41)3p( 1.50)3d( 0.04)    |
|                                                                                                                       | 4             | Al | 0.05           | 3S( 1.41)3p( 1.50)3d( 0.04)    |
|                                                                                                                       | 5             | Al | 0.05           | 3S( 1.41)3p( 1.50)3d( 0.04)    |
|                                                                                                                       | 6             | Sc | -0.24          | 4S( 0.57)3d( 2.21)4p( 0.45)    |
|  <p><b>c.6.B.2</b><br/>doublet</p> | 1             | Al | 0.26           | 3S( 1.39)3p( 1.31)3d( 0.03)    |
|                                                                                                                       | 2             | Al | 0.11           | 3S( 1.28)3p( 1.54)3d( 0.06)    |
|                                                                                                                       | 3             | Al | 0.26           | 3S( 1.39)3p( 1.31)3d( 0.03)    |
|                                                                                                                       | 4             | Al | 0.26           | 3S( 1.39)3p( 1.31)3d( 0.03)    |
|                                                                                                                       | 5             | Al | 0.26           | 3S( 1.39)3p( 1.31)3d( 0.03)    |
|                                                                                                                       | 6             | Sc | -0.14          | 4S( 0.21)3d( 2.42)4p( 0.50)    |

**Table S7:** Natural Electron Configuration (NEC) and Natural Charge of **da.6.C.1**, **da.6.C.2**, **a.6.C.1**, **n.6.C.1** and **c.6.C.1** isomers at their most stable spin state.

| Isomers                                                                                                               | Atom's number |    | Natural Charge | Natural Electron Configuration |
|-----------------------------------------------------------------------------------------------------------------------|---------------|----|----------------|--------------------------------|
| 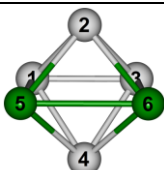 <p><b>da.6.C.1</b><br/>singlet</p>  | 1             | Al | -0.28          | 3S( 1.39)3p( 1.85)3d( 0.03)    |
|                                                                                                                       | 2             | Al | -0.18          | 3S( 1.35)3p( 1.81)3d( 0.02)    |
|                                                                                                                       | 3             | Al | -0.28          | 3S( 1.39)3p( 1.85)3d( 0.03)    |
|                                                                                                                       | 4             | Al | -0.18          | 3S( 1.35)3p( 1.81)3d( 0.02)    |
|                                                                                                                       | 5             | Sc | -0.53          | 4S( 1.10)3d( 1.90)4p( 0.45)    |
|                                                                                                                       | 6             | Sc | -0.53          | 4S( 1.10)3d( 1.90)4p( 0.45)    |
|  <p><b>da.6.C.2</b><br/>singlet</p>  | 1             | Al | -0.27          | 3S( 1.37)3p( 1.86)3d( 0.02)    |
|                                                                                                                       | 2             | Al | -0.27          | 3S( 1.37)3p( 1.86)3d( 0.02)    |
|                                                                                                                       | 3             | Al | -0.27          | 3S( 1.37)3p( 1.86)3d( 0.02)    |
|                                                                                                                       | 4             | Al | -0.27          | 3S( 1.37)3p( 1.86)3d( 0.02)    |
|                                                                                                                       | 5             | Sc | -0.46          | 4S( 1.18)3d( 1.65)4p( 0.55)    |
|                                                                                                                       | 6             | Sc | -0.46          | 4S( 1.18)3d( 1.65)4p( 0.55)    |
|  <p><b>a.6.C.1</b><br/>doublet</p>  | 1             | Al | -0.14          | 3S( 1.34)3p( 1.76)3d( 0.02)    |
|                                                                                                                       | 2             | Al | -0.14          | 3S( 1.34)3p( 1.76)3d( 0.02)    |
|                                                                                                                       | 3             | Al | -0.14          | 3S( 1.34)3p( 1.76)3d( 0.02)    |
|                                                                                                                       | 4             | Al | -0.14          | 3S( 1.34)3p( 1.76)3d( 0.02)    |
|                                                                                                                       | 5             | Sc | -0.23          | 4S( 0.79)3d( 1.86)4p( 0.54)    |
|                                                                                                                       | 6             | Sc | -0.23          | 4S( 0.79)3d( 1.86)4p( 0.54)    |
|  <p><b>n.6.C.1</b><br/>singlet</p> | 1             | Al | -0.02          | 3S( 1.32)3p( 1.66)3d( 0.02)    |
|                                                                                                                       | 2             | Al | -0.02          | 3S( 1.32)3p( 1.66)3d( 0.02)    |
|                                                                                                                       | 3             | Al | -0.02          | 3S( 1.32)3p( 1.66)3d( 0.02)    |
|                                                                                                                       | 4             | Al | -0.02          | 3S( 1.32)3p( 1.66)3d( 0.02)    |
|                                                                                                                       | 5             | Sc | 0.03           | 4S( 0.44)3d( 2.07)4p( 0.44)    |
|                                                                                                                       | 6             | Sc | 0.03           | 4S( 0.44)3d( 2.07)4p( 0.44)    |
|  <p><b>c.6.C.1</b><br/>doublet</p> | 1             | Al | 0.19           | 3S( 1.36)3p( 1.42)3d( 0.02)    |
|                                                                                                                       | 2             | Al | 0.19           | 3S( 1.36)3p( 1.42)3d( 0.02)    |
|                                                                                                                       | 3             | Al | 0.19           | 3S( 1.36)3p( 1.42)3d( 0.02)    |
|                                                                                                                       | 4             | Al | 0.19           | 3S( 1.36)3p( 1.42)3d( 0.02)    |
|                                                                                                                       | 5             | Sc | 0.11           | 4S( 0.41)3d( 2.06)4p( 0.40)    |
|                                                                                                                       | 6             | Sc | 0.11           | 4S( 0.41)3d( 2.06)4p( 0.40)    |

**Table S8:** Natural Electron Configuration (NEC) and Natural Charge of **a.13.A.1**, **n.13.A.1** and **c.13.A.1** isomers at their most stable spin state.

| Isomers                                                                                                                | Atom's number | Natural Charge | Natural Electron Configuration |                              |
|------------------------------------------------------------------------------------------------------------------------|---------------|----------------|--------------------------------|------------------------------|
| 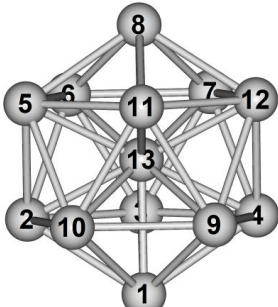 <p><b>a.13.A.1</b><br/>singlet</p>   | 1             | Al             | 0.04                           | 3S( 1.33)3p( 1.54)3d( 0.06)  |
|                                                                                                                        | 2             | Al             | 0.04                           | 3S( 1.33)3p( 1.54)3d( 0.06)  |
|                                                                                                                        | 3             | Al             | 0.04                           | 3S( 1.33)3p( 1.54)3d( 0.06)  |
|                                                                                                                        | 4             | Al             | 0.04                           | 3S( 1.33)3p( 1.54)3d( 0.06)  |
|                                                                                                                        | 5             | Al             | 0.04                           | 3S( 1.33)3p( 1.54)3d( 0.06)  |
|                                                                                                                        | 6             | Al             | 0.04                           | 3S( 1.33)3p( 1.54)3d( 0.06)  |
|                                                                                                                        | 7             | Al             | 0.04                           | 3S( 1.33)3p( 1.54)3d( 0.06)  |
|                                                                                                                        | 8             | Al             | 0.04                           | 3S( 1.33)3p( 1.54)3d( 0.06)  |
|                                                                                                                        | 9             | Al             | 0.04                           | 3S( 1.33)3p( 1.54)3d( 0.06)  |
|                                                                                                                        | 10            | Al             | 0.04                           | 3S( 1.33)3p( 1.54)3d( 0.06)  |
|                                                                                                                        | 11            | Al             | 0.04                           | 3S( 1.33)3p( 1.54)3d( 0.06)  |
|                                                                                                                        | 12            | Al             | 0.04                           | 3S( 1.33)3p( 1.54)3d( 0.06)  |
|                                                                                                                        | 13            | Al             | -1.48                          | 3S( 0.84)3p( 3.56)3d( 0.04)  |
|  <p><b>n.13.A.1</b><br/>doublet</p>  | 1             | Al             | 0.09                           | 3S( 1.34)3p( 1.47)3d( 0.07)  |
|                                                                                                                        | 2             | Al             | 0.18                           | 3S( 1.34)3p( 1.39)3d( 0.06)  |
|                                                                                                                        | 3             | Al             | 0.18                           | 3S( 1.34)3p( 1.39)3d( 0.06)  |
|                                                                                                                        | 4             | Al             | 0.09                           | 3S( 1.34)3p( 1.47)3d( 0.07)  |
|                                                                                                                        | 5             | Al             | 0.09                           | 3S( 1.34)3p( 1.47)3d( 0.07)  |
|                                                                                                                        | 6             | Al             | 0.18                           | 3S( 1.34)3p( 1.40)3d( 0.06)  |
|                                                                                                                        | 7             | Al             | 0.09                           | 3S( 1.34)3p( 1.47)3d( 0.07)  |
|                                                                                                                        | 8             | Al             | 0.09                           | 3S( 1.34)3p( 1.47)3d( 0.07)  |
|                                                                                                                        | 9             | Al             | 0.18                           | 3S( 1.34)3p( 1.39)3d( 0.06)  |
|                                                                                                                        | 10            | Al             | 0.09                           | 3S( 1.34)3p( 1.47)3d( 0.07)  |
|                                                                                                                        | 11            | Al             | 0.18                           | 3S( 1.34)3p( 1.40)3d( 0.06)  |
|                                                                                                                        | 12            | Al             | 0.18                           | 3S( 1.34)3p( 1.40)3d( 0.06)  |
|                                                                                                                        | 13            | Al             | -1.62                          | 3S( 0.89)3p( 3.66)3d( 0.04)  |
|  <p><b>c.13.A.1</b><br/>singlet</p> | 1             | Al             | 0.20                           | 3S( 1.31)3p( 1.43)3d( 0.04)  |
|                                                                                                                        | 2             | Al             | 0.24                           | 3S( 1.29)3p( 1.39)3d( 0.05)  |
|                                                                                                                        | 3             | Al             | 0.23                           | 3S( 1.29)3p( 1.41)3d( 0.05)  |
|                                                                                                                        | 4             | Al             | 0.24                           | 3S( 1.32)3p( 1.38)3d( 0.04)  |
|                                                                                                                        | 5             | Al             | 0.18                           | 3S( 1.27)3p( 1.48)3d( 0.06)  |
|                                                                                                                        | 6             | Al             | -0.16                          | 3S( 1.07)3p( 1.89) 3d( 0.16) |
|                                                                                                                        | 7             | Al             | 0.15                           | 3S( 1.26)3p( 1.51)3d( 0.06)  |
|                                                                                                                        | 8             | Al             | 0.13                           | 3S( 1.24)3p( 1.54)3d( 0.06)  |
|                                                                                                                        | 9             | Al             | 0.19                           | 3S( 1.31)3p( 1.45)3d( 0.04)  |
|                                                                                                                        | 10            | Al             | 0.23                           | 3S( 1.32)3p( 1.39)3d( 0.04)  |
|                                                                                                                        | 11            | Al             | 0.25                           | 3S( 1.33)3p( 1.37)3d( 0.04)  |
|                                                                                                                        | 12            | Al             | 0.25                           | 3S( 1.33)3p( 1.36)3d( 0.05)  |
|                                                                                                                        | 13            | Al             | -1.14                          | 3S( 0.96)3p( 3.08)3d( 0.05)  |

**Table S9:** Natural Electron Configuration (NEC) and Natural Charge of **a.13.B.1**, **n.13.B.1** and **c.13.B.1** isomers at their most stable spin state.

| Isomers                                                                                                                | Atom's number | Natural Charge | Natural Electron Configuration |                             |
|------------------------------------------------------------------------------------------------------------------------|---------------|----------------|--------------------------------|-----------------------------|
| 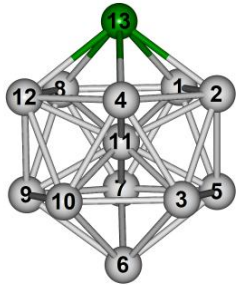 <p><b>a.13.B.1</b><br/>singlet</p>   | 1             | Al             | 0.08                           | 3S( 1.26)3p( 1.58)3d( 0.06) |
|                                                                                                                        | 2             | Al             | 0.08                           | 3S( 1.26)3p( 1.58)3d( 0.06) |
|                                                                                                                        | 3             | Al             | 0.05                           | 3S( 1.31)3p( 1.56)3d( 0.06) |
|                                                                                                                        | 4             | Al             | 0.08                           | 3S( 1.26)3p( 1.58)3d( 0.06) |
|                                                                                                                        | 5             | Al             | 0.05                           | 3S( 1.31)3p( 1.56)3d( 0.06) |
|                                                                                                                        | 6             | Al             | -0.01                          | 3S( 1.46)3p( 1.48)3d( 0.04) |
|                                                                                                                        | 7             | Al             | 0.05                           | 3S( 1.31)3p( 1.56)3d( 0.06) |
|                                                                                                                        | 8             | Al             | 0.08                           | 3S( 1.26)3p( 1.58)3d( 0.06) |
|                                                                                                                        | 9             | Al             | 0.05                           | 3S( 1.31)3p( 1.56)3d( 0.06) |
|                                                                                                                        | 10            | Al             | 0.05                           | 3S( 1.31)3p( 1.56)3d( 0.06) |
|                                                                                                                        | 11            | Al             | -1.22                          | 3S( 0.82)3p( 3.32)3d( 0.04) |
|                                                                                                                        | 12            | Al             | 0.08                           | 3S( 1.26)3p( 1.58)3d( 0.06) |
|                                                                                                                        | 13            | Sc             | -0.47                          | 4S( 0.70)3d( 2.06)4p( 0.64) |
|  <p><b>n.13.B.1</b><br/>doublet</p>  | 1             | Al             | 0.17                           | 3S( 1.26)3p( 1.50)3d( 0.06) |
|                                                                                                                        | 2             | Al             | 0.17                           | 3S( 1.26)3p( 1.50)3d( 0.06) |
|                                                                                                                        | 3             | Al             | 0.15                           | 3S( 1.29)3p( 1.48)3d( 0.06) |
|                                                                                                                        | 4             | Al             | 0.17                           | 3S( 1.26)3p( 1.50)3d( 0.06) |
|                                                                                                                        | 5             | Al             | 0.15                           | 3S( 1.29)3p( 1.48)3d( 0.06) |
|                                                                                                                        | 6             | Al             | 0.01                           | 3S( 1.23)3p( 1.67)3d( 0.08) |
|                                                                                                                        | 7             | Al             | 0.15                           | 3S( 1.29)3p( 1.48)3d( 0.06) |
|                                                                                                                        | 8             | Al             | 0.17                           | 3S( 1.26)3p( 1.50)3d( 0.06) |
|                                                                                                                        | 9             | Al             | 0.15                           | 3S( 1.29)3p( 1.48)3d( 0.06) |
|                                                                                                                        | 10            | Al             | 0.15                           | 3S( 1.29)3p( 1.48)3d( 0.06) |
|                                                                                                                        | 11            | Al             | -1.24                          | 3S( 0.83)3p( 3.33)3d( 0.05) |
|                                                                                                                        | 12            | Al             | 0.17                           | 3S( 1.26)3p( 1.50)3d( 0.06) |
|                                                                                                                        | 13            | Sc             | -0.35                          | 4S( 0.39)3d( 2.24)4p( 0.67) |
|  <p><b>c.13.B.1</b><br/>singlet</p> | 1             | Al             | 0.27                           | 3S( 1.25)3p( 1.41)3d( 0.06) |
|                                                                                                                        | 2             | Al             | 0.27                           | 3S( 1.25)3p( 1.41)3d( 0.06) |
|                                                                                                                        | 3             | Al             | 0.27                           | 3S( 1.25)3p( 1.41)3d( 0.06) |
|                                                                                                                        | 4             | Al             | 0.25                           | 3S( 1.26)3p( 1.41)3d( 0.06) |
|                                                                                                                        | 5             | Al             | 0.25                           | 3S( 1.26)3p( 1.41)3d( 0.06) |
|                                                                                                                        | 6             | Al             | 0.00                           | 3S( 1.14)3p( 1.75)3d( 0.10) |
|                                                                                                                        | 7             | Al             | 0.25                           | 3S( 1.26)3p( 1.41)3d( 0.06) |
|                                                                                                                        | 8             | Al             | 0.25                           | 3S( 1.26)3p( 1.41)3d( 0.06) |
|                                                                                                                        | 9             | Al             | 0.25                           | 3S( 1.26)3p( 1.41)3d( 0.06) |
|                                                                                                                        | 10            | Al             | 0.27                           | 3S( 1.25)3p( 1.41)3d( 0.06) |
|                                                                                                                        | 11            | Al             | 0.27                           | 3S( 1.25)3p( 1.41)3d( 0.06) |
|                                                                                                                        | 12            | Al             | -1.25                          | 3S( 0.84)3p( 3.32)3d( 0.04) |
|                                                                                                                        | 13            | Sc             | -0.31                          | 4S( 0.15)3d( 2.41)4p( 0.71) |



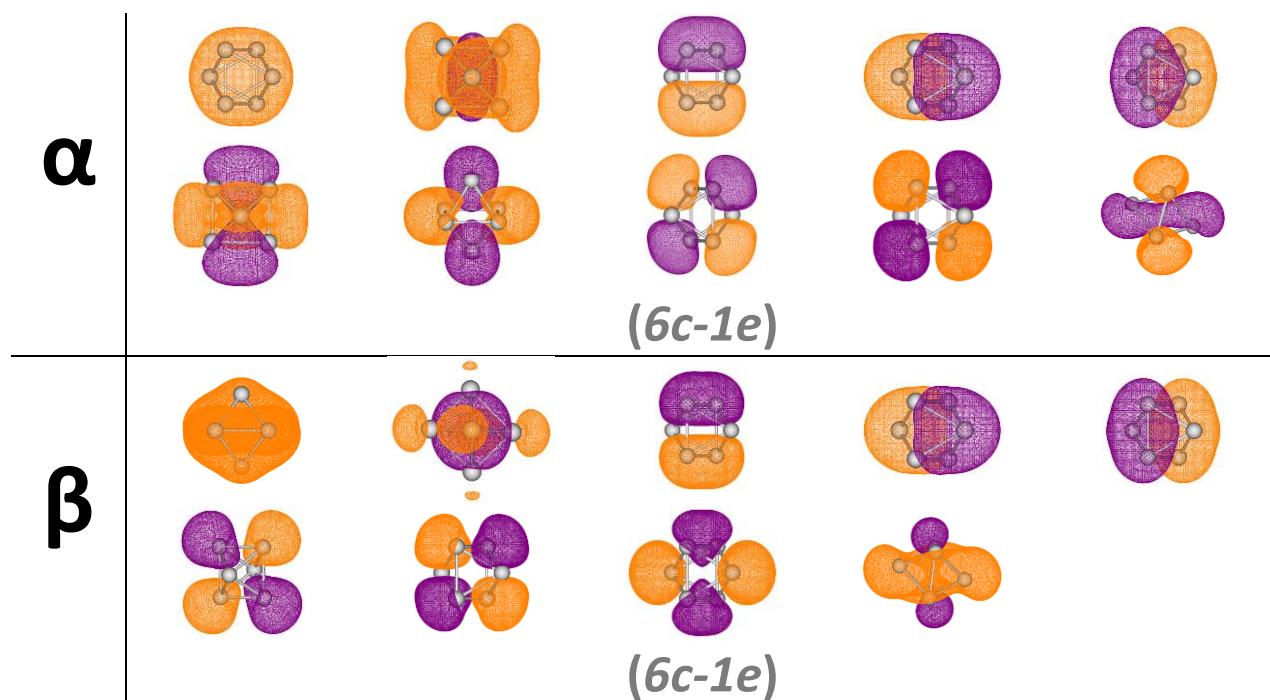

**Figure S17:** The metallic aromaticity arising from  $(6c-1e)$  delocalized bonds in the anionic octahedral **a.6.A.1** isomer via AdNDP analysis.

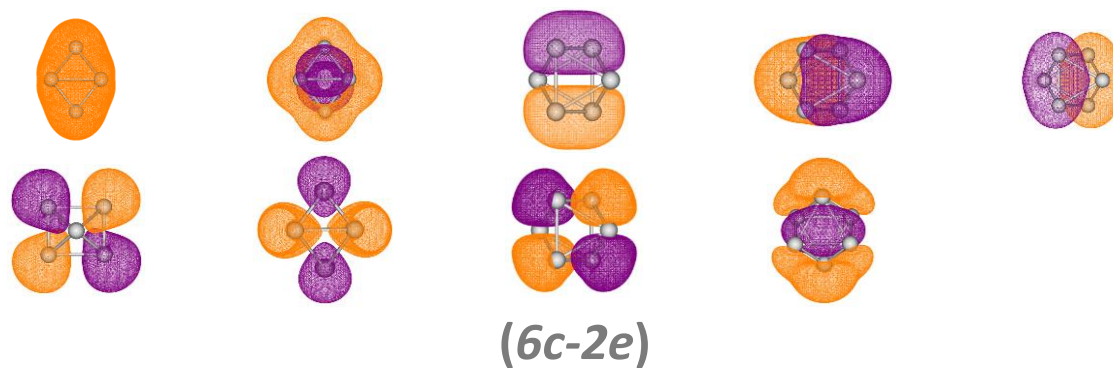

**Figure S18:** The metallic aromaticity arising from  $(6c-2e)$  delocalized bonds in the neutral octahedral **n.6.A.1** isomer via AdNDP analysis.

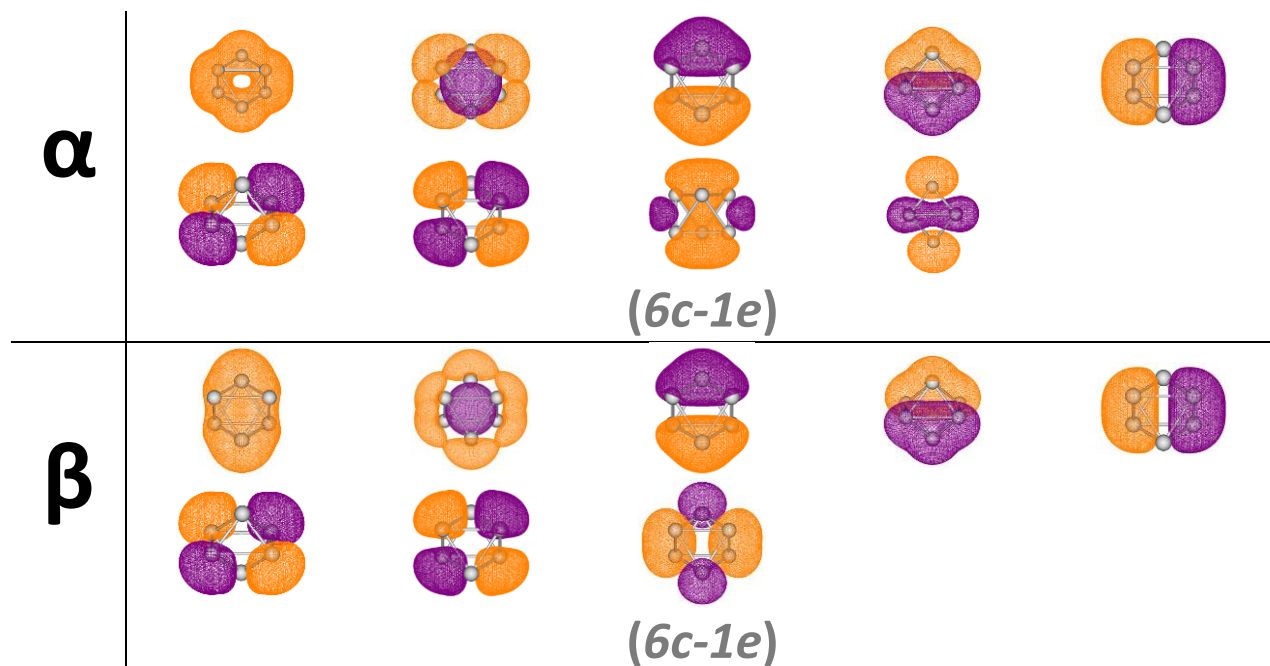

**Figure S19:** The metallic aromaticity arising from  $(6c-1e)$  delocalized bonds in the cationic octahedral **c.6.A.1** isomer via AdNDP analysis.

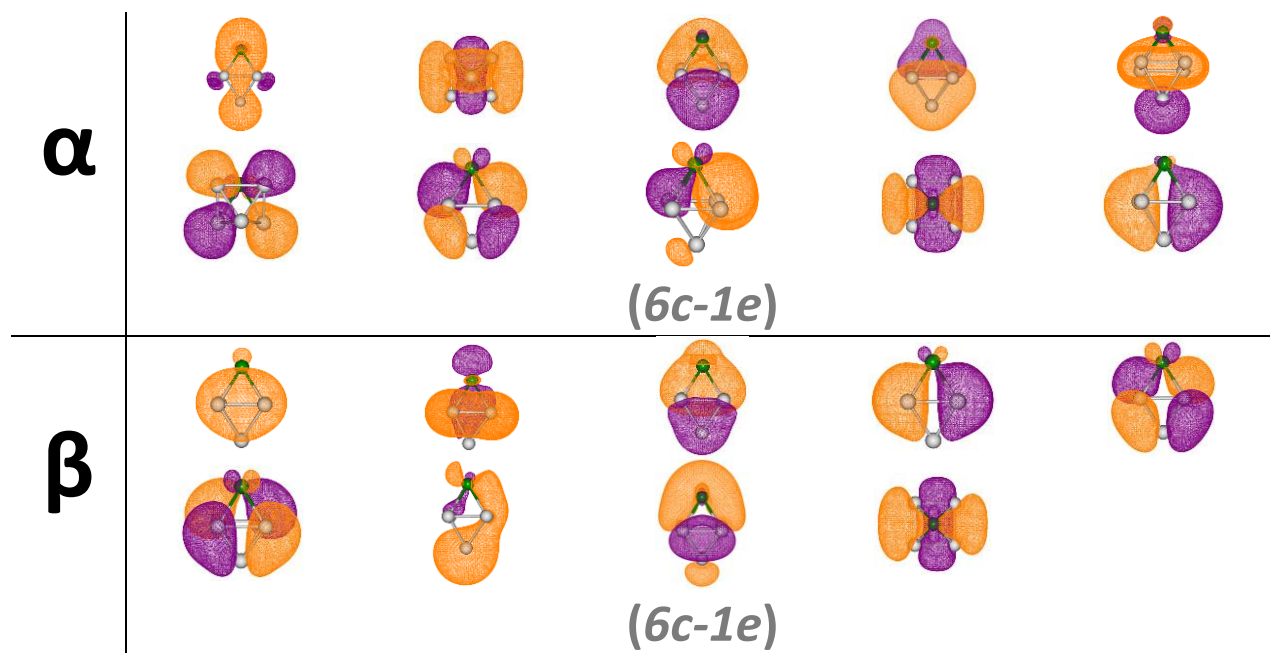

**Figure S20:** The metallic aromaticity arising from  $(6c-1e)$  delocalized bonds in the anionic octahedral **a.6.B.1** isomer via AdNDP analysis.

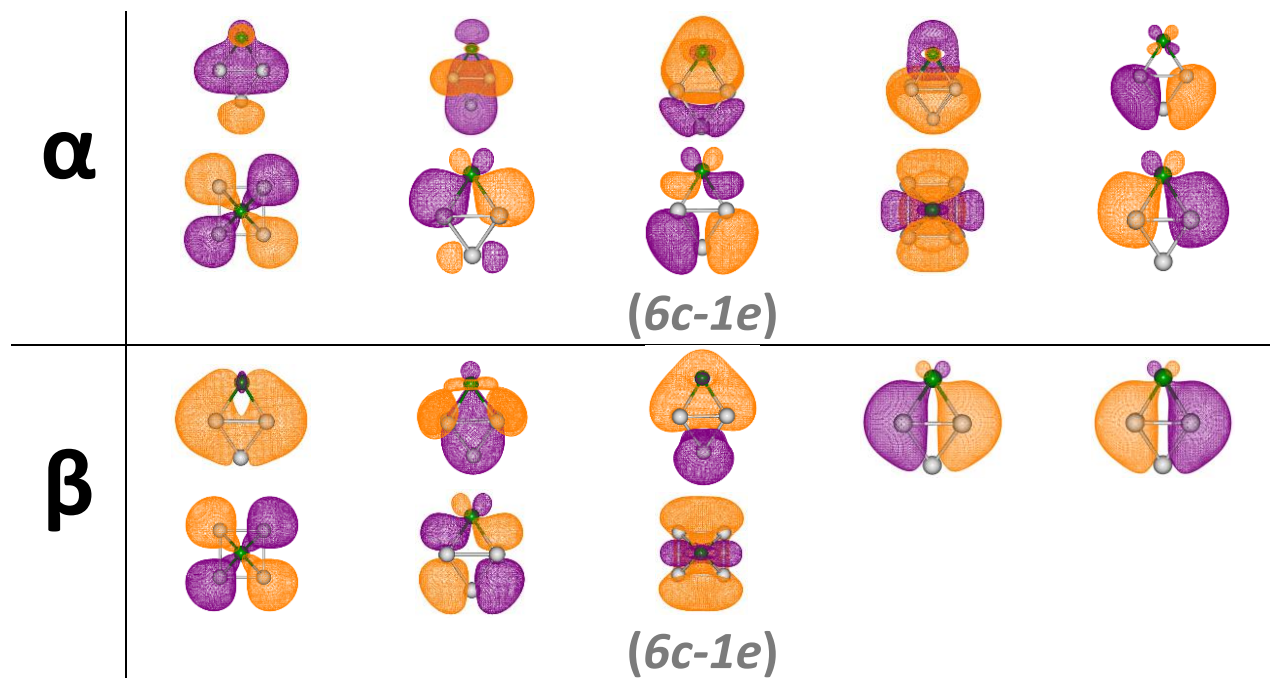

**Figure S21:** The metallic aromaticity arising from  $(6c-2e)$  delocalized bonds in the neutral octahedral **n.6.B.1** isomer via AdNDP analysis.

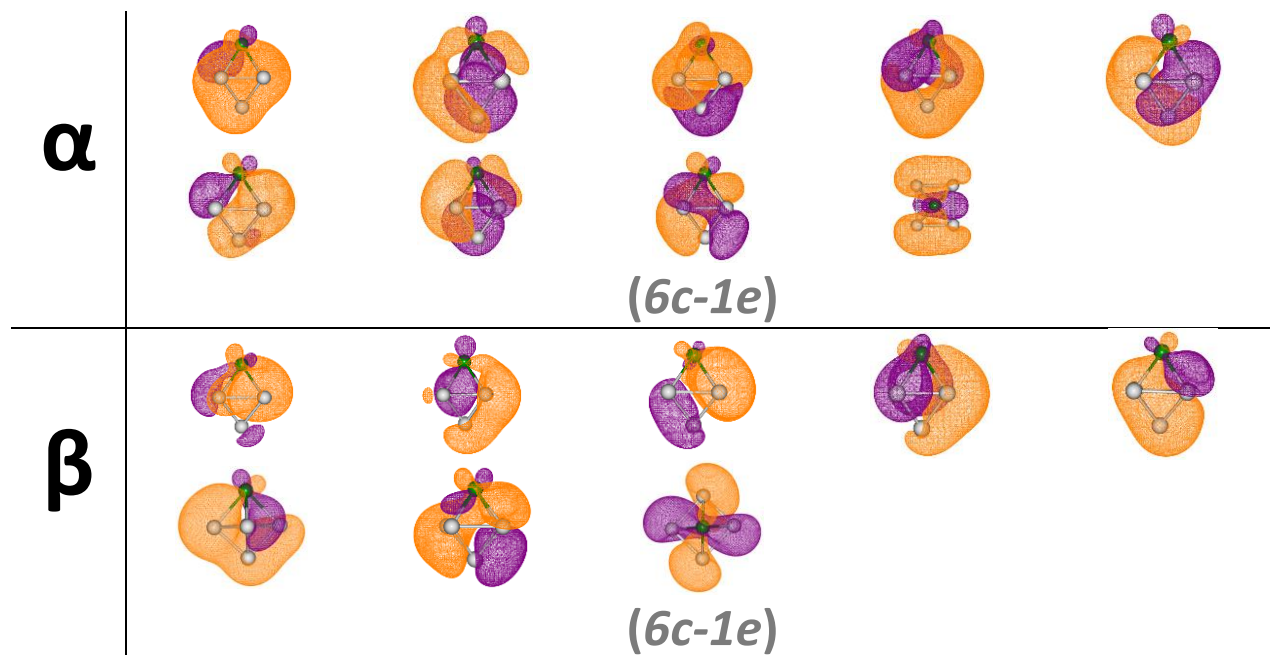

**Figure S22:** The metallic aromaticity arising from  $(6c-1e)$  delocalized bonds in the cationic octahedral **c.6.B.2** isomer via AdNDP analysis.

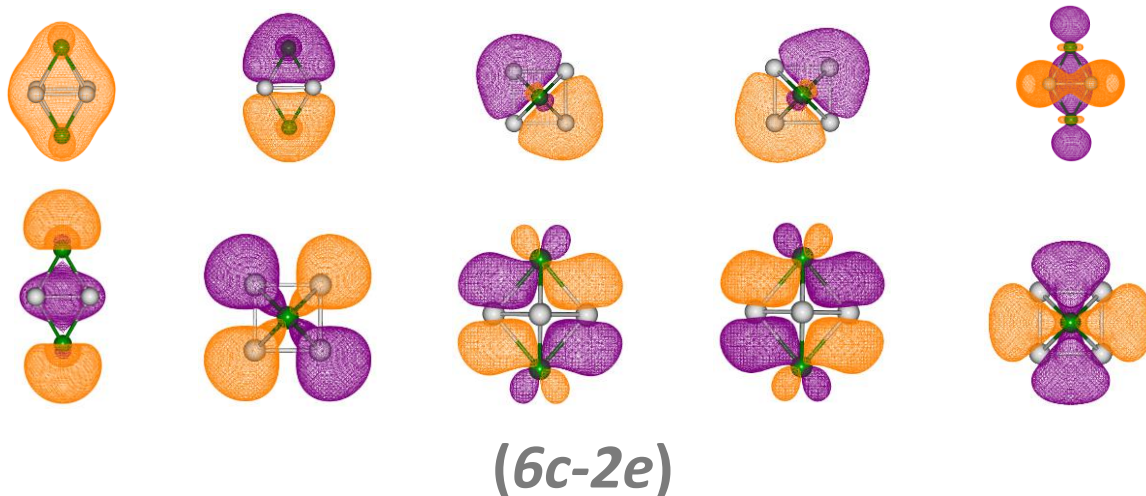

**Figure S23:** The metallic aromaticity arising from  $(6c-2e)$  delocalized bonds in the di-anionic octahedral **da.6.C.2** isomer via AdNDP analysis.

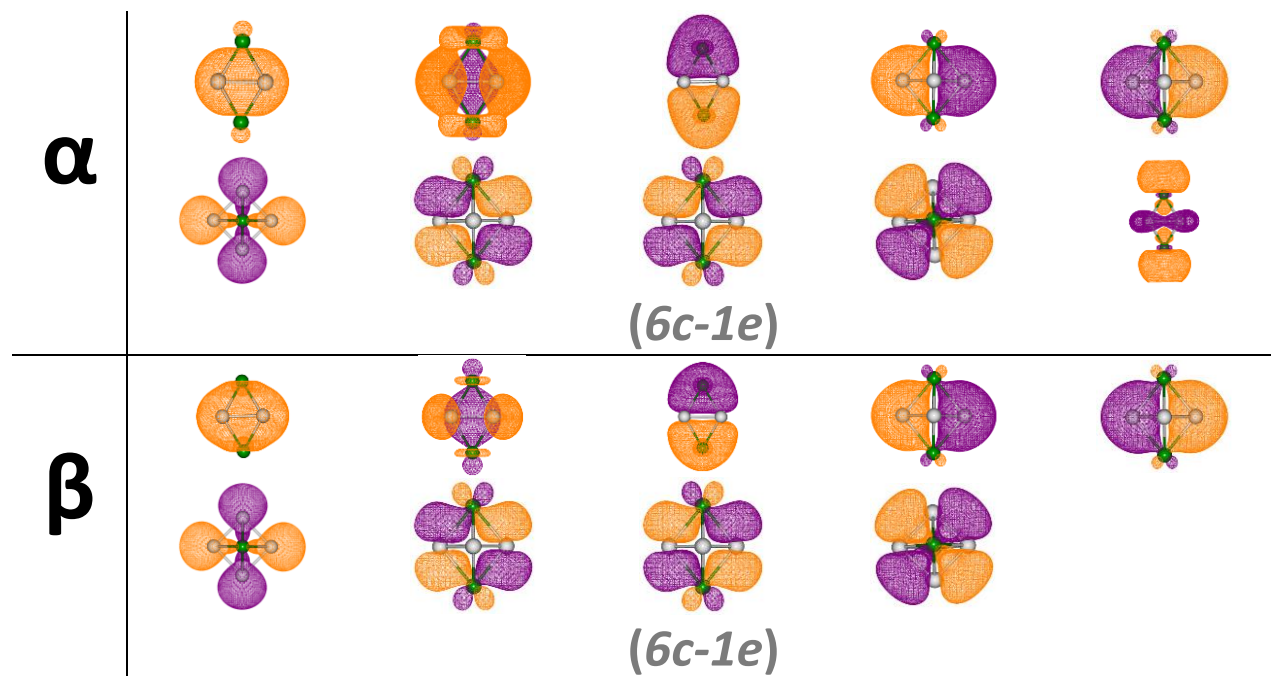

**Figure S24:** The metallic aromaticity arising from  $(6c-1e)$  delocalized bonds in the anionic octahedral **a.6.C.1** isomer via AdNDP analysis.

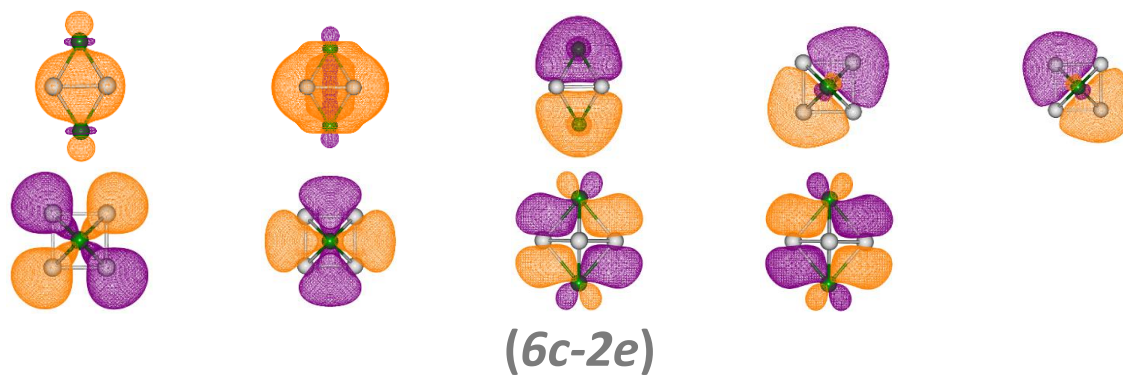

**Figure S25:** The metallic aromaticity arising from  $(6c-2e)$  delocalized bonds in the neutral octahedral **n.6.C.1** isomer via AdNDP analysis.

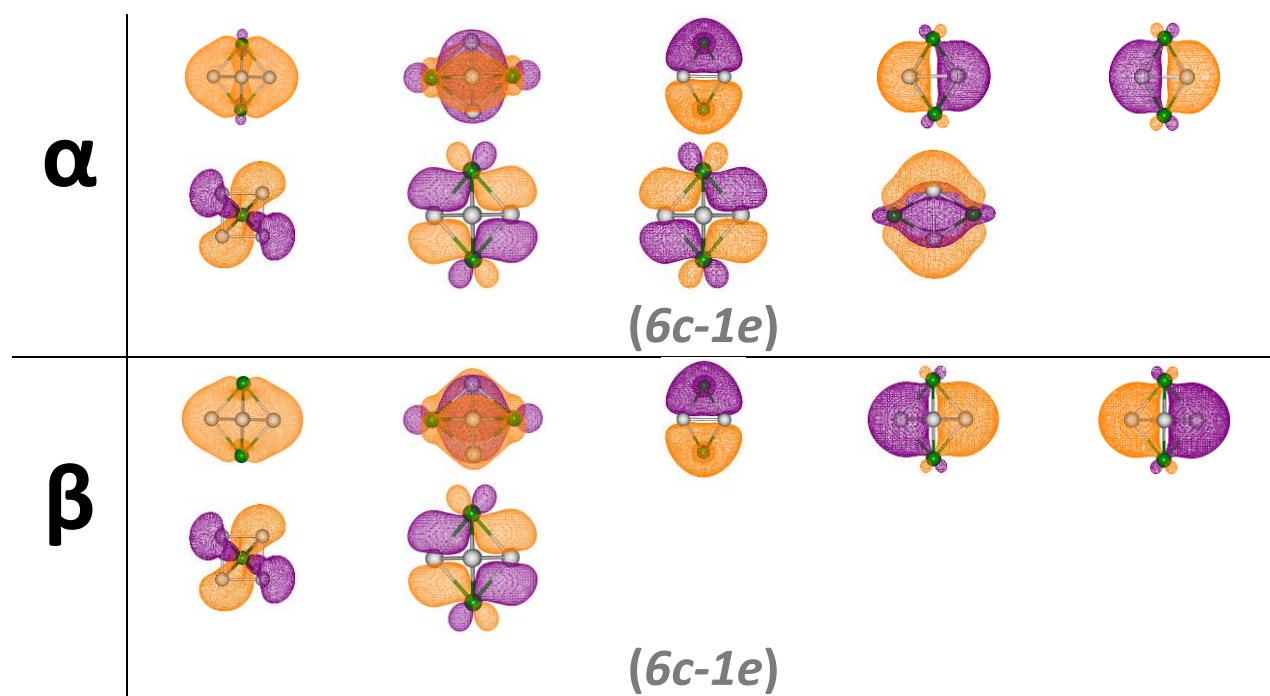

**Figure S26:** The metallic aromaticity arising from  $(6c-1e)$  delocalized bonds in the cationic octahedral **c.6.C.1** isomer via AdNDP analysis.

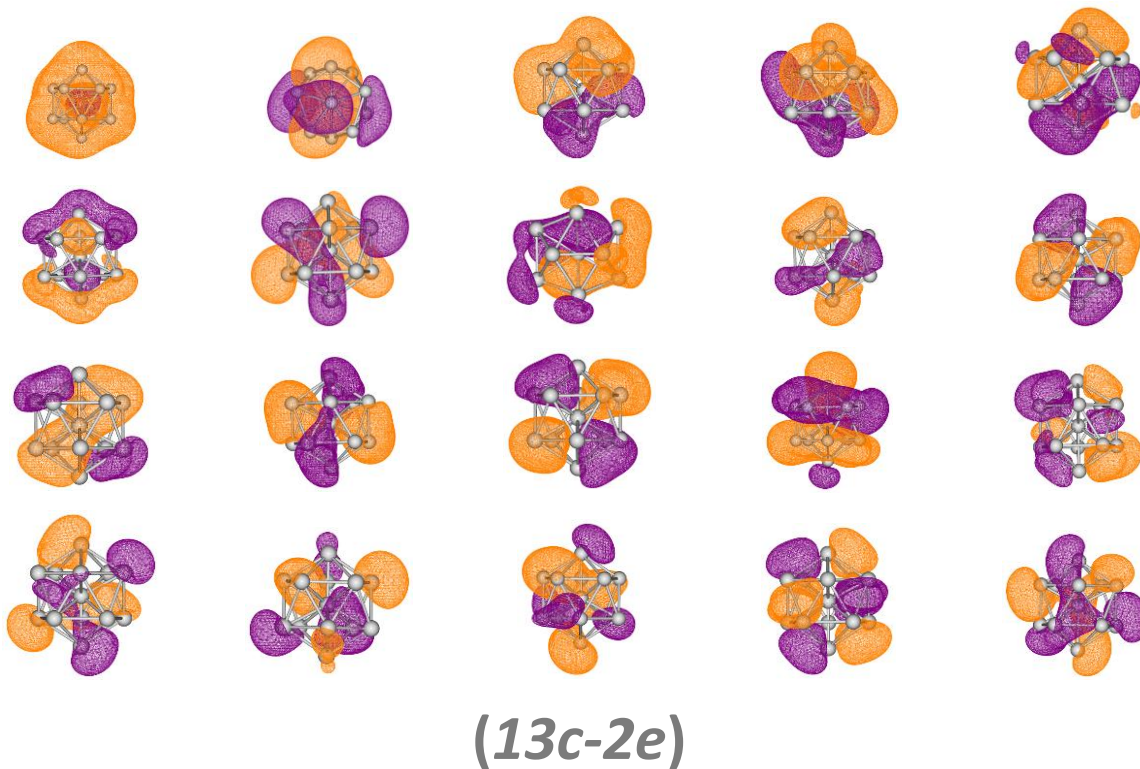

**Figure S27:** The metallic aromaticity arising from ( $6c-2e$ ) delocalized bonds in the anionic icosahedral **a.13.A.1** isomer via AdNDP analysis.

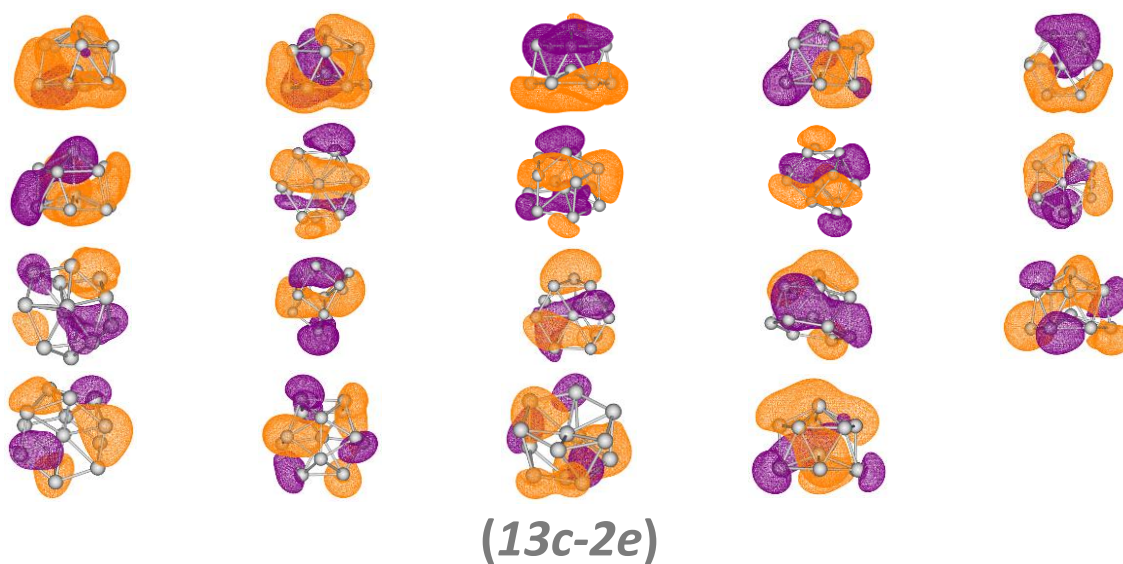

**Figure S28:** The metallic aromaticity arising from ( $13c-2e$ ) delocalized bonds in the cationic **c.13.A.1** isomer cluster via AdNDP analysis.

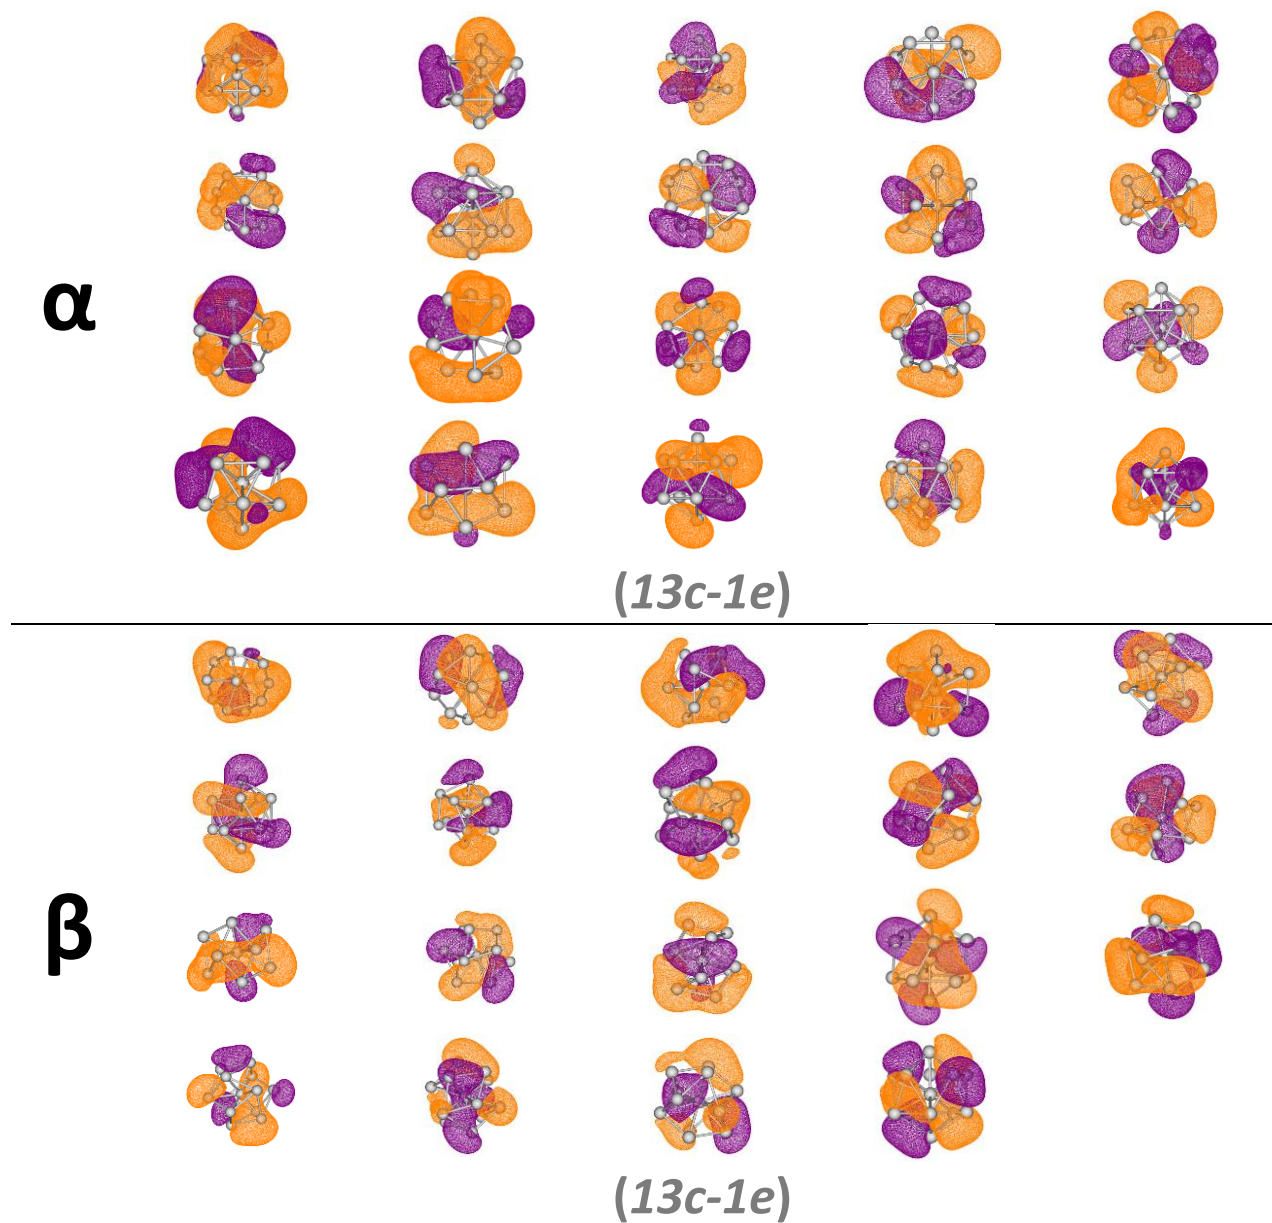

**Figure S29:** The metallic aromaticity arising from *(13c-1e)* delocalized bonds in the neutral icosahedral **n.13.A.1** isomer via AdNDP analysis.

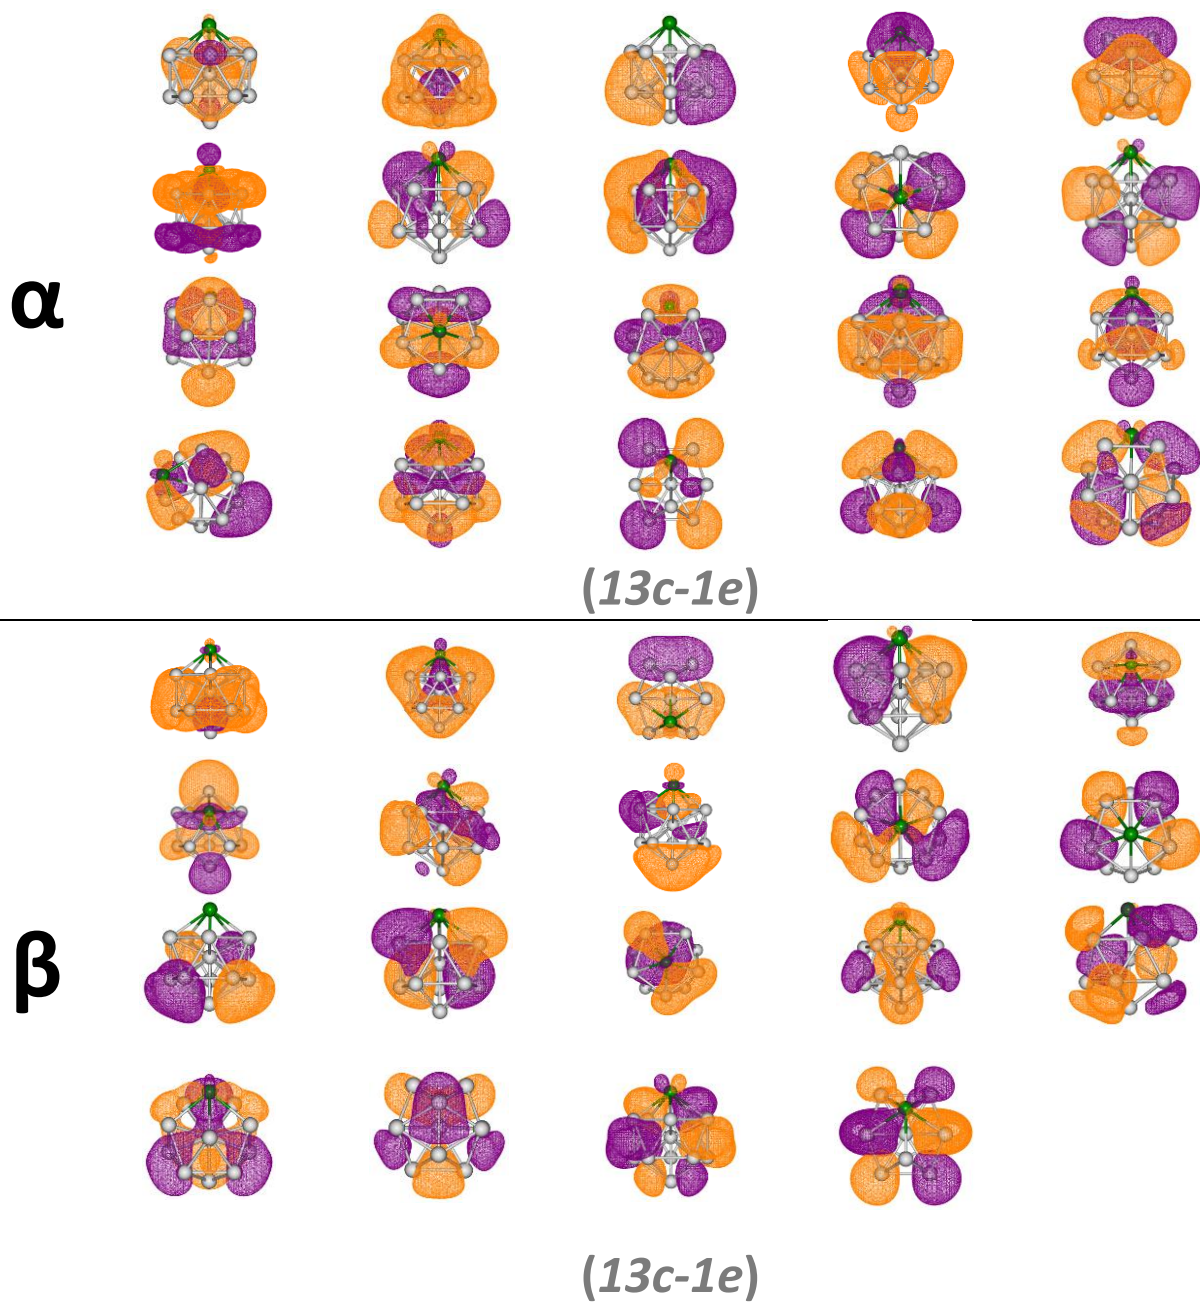

**Figure S30:** The metallic aromaticity arising from *(13c-1e)* delocalized bonds in the neutral icosahedral **n.13.B.1** isomer via AdNDP analysis.

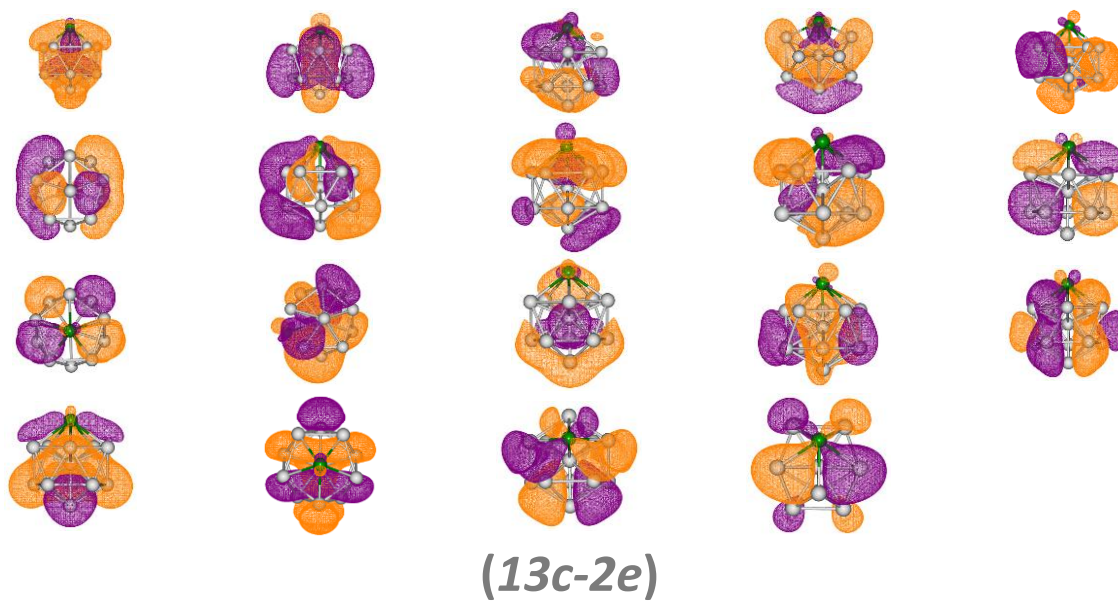

**Figure S31:** The metallic aromaticity arising from (*13c-2e*) delocalized bonds in the cationic icosahedral **c.13.B.1** isomer via AdNDP analysis.

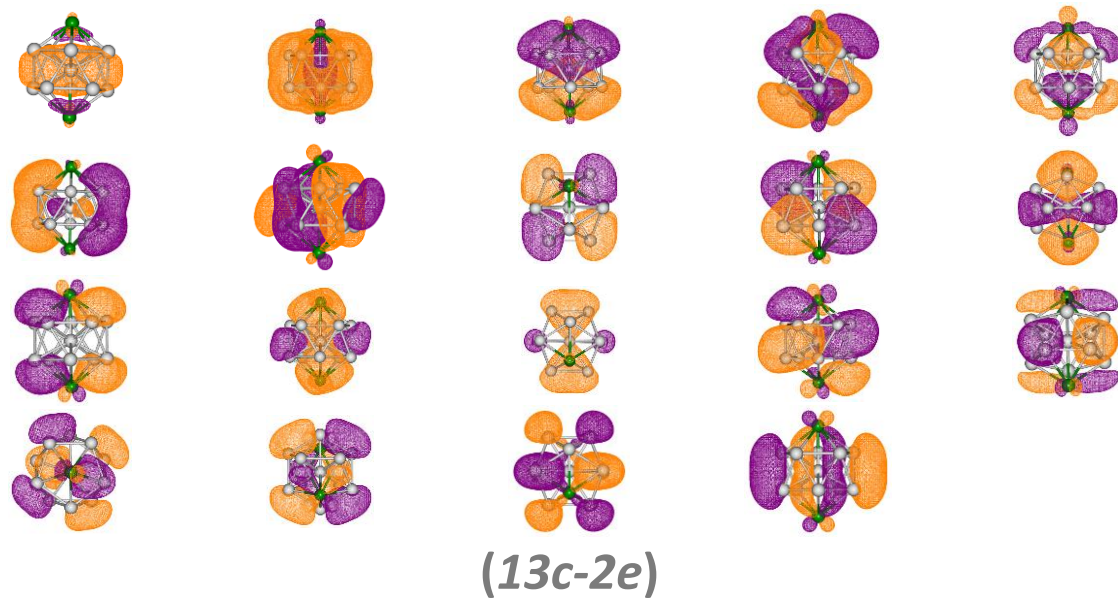

**Figure S32:** The metallic aromaticity arising from (*13c-2e*) delocalized bonds in the cationic icosahedral **c.13.C.1** isomer via AdNDP analysis.

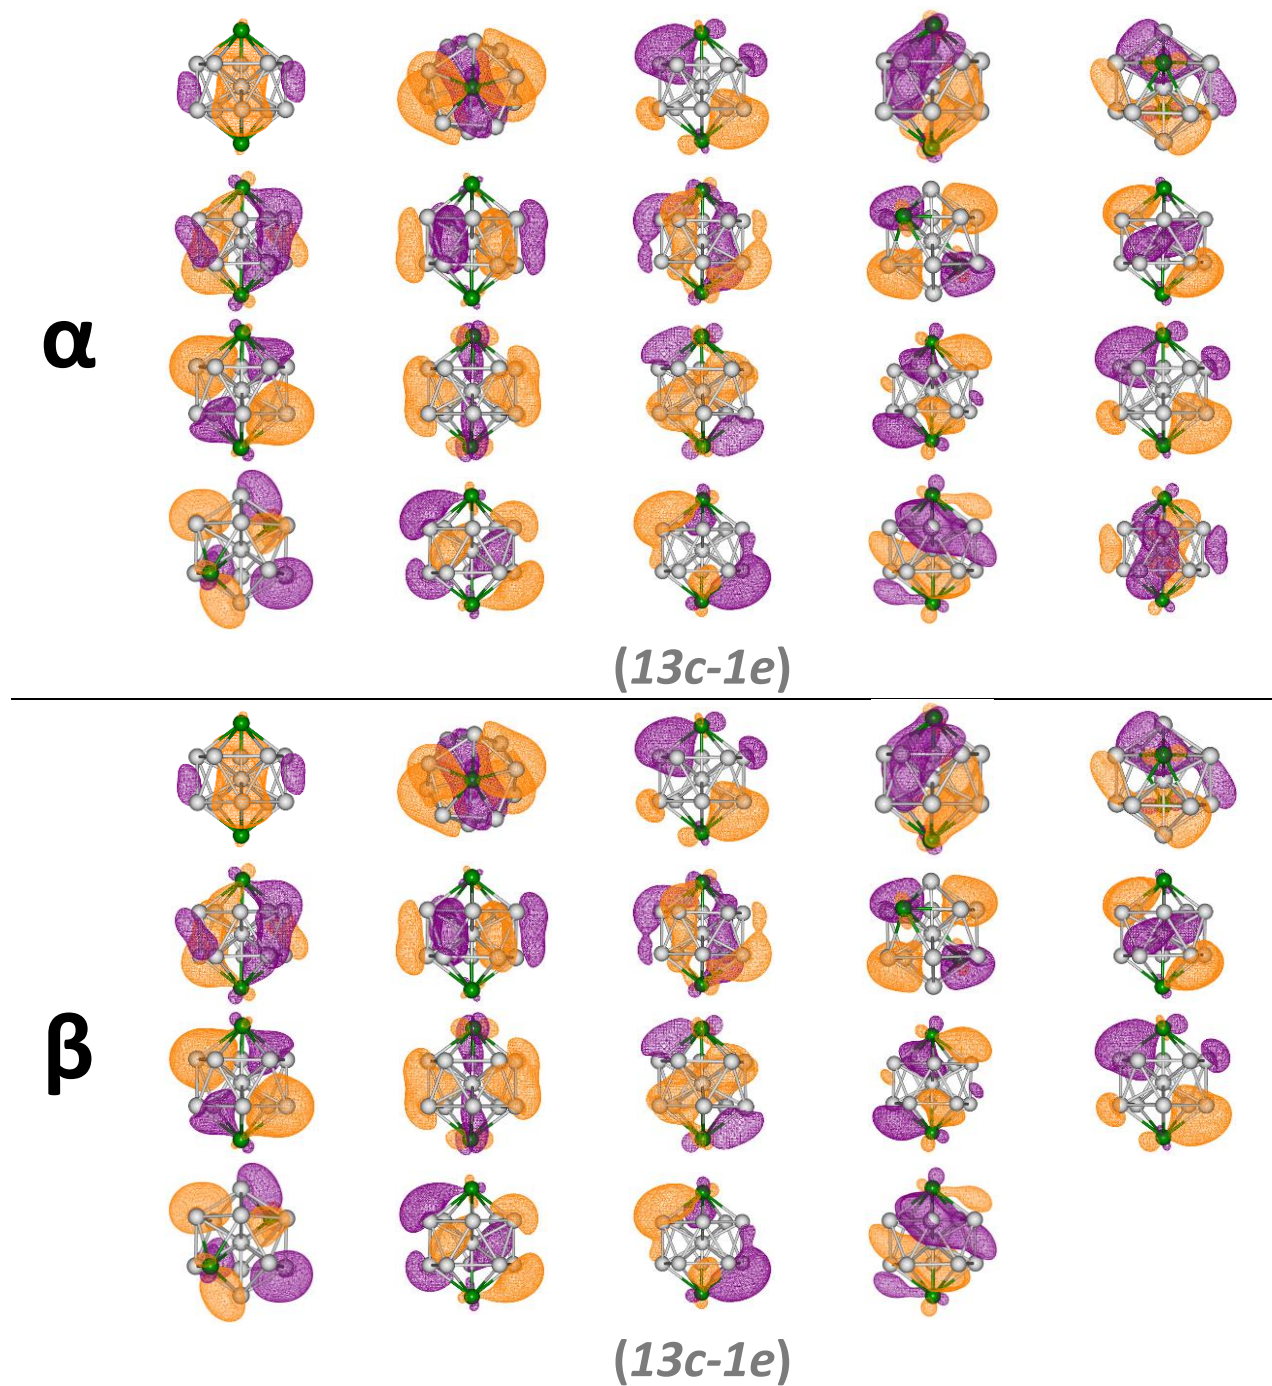

**Figure S33:** The metallic aromaticity arising from (13c-1e) delocalized bonds in the neutral icosahedral **n.13.C.1** isomer via AdNDP analysis.

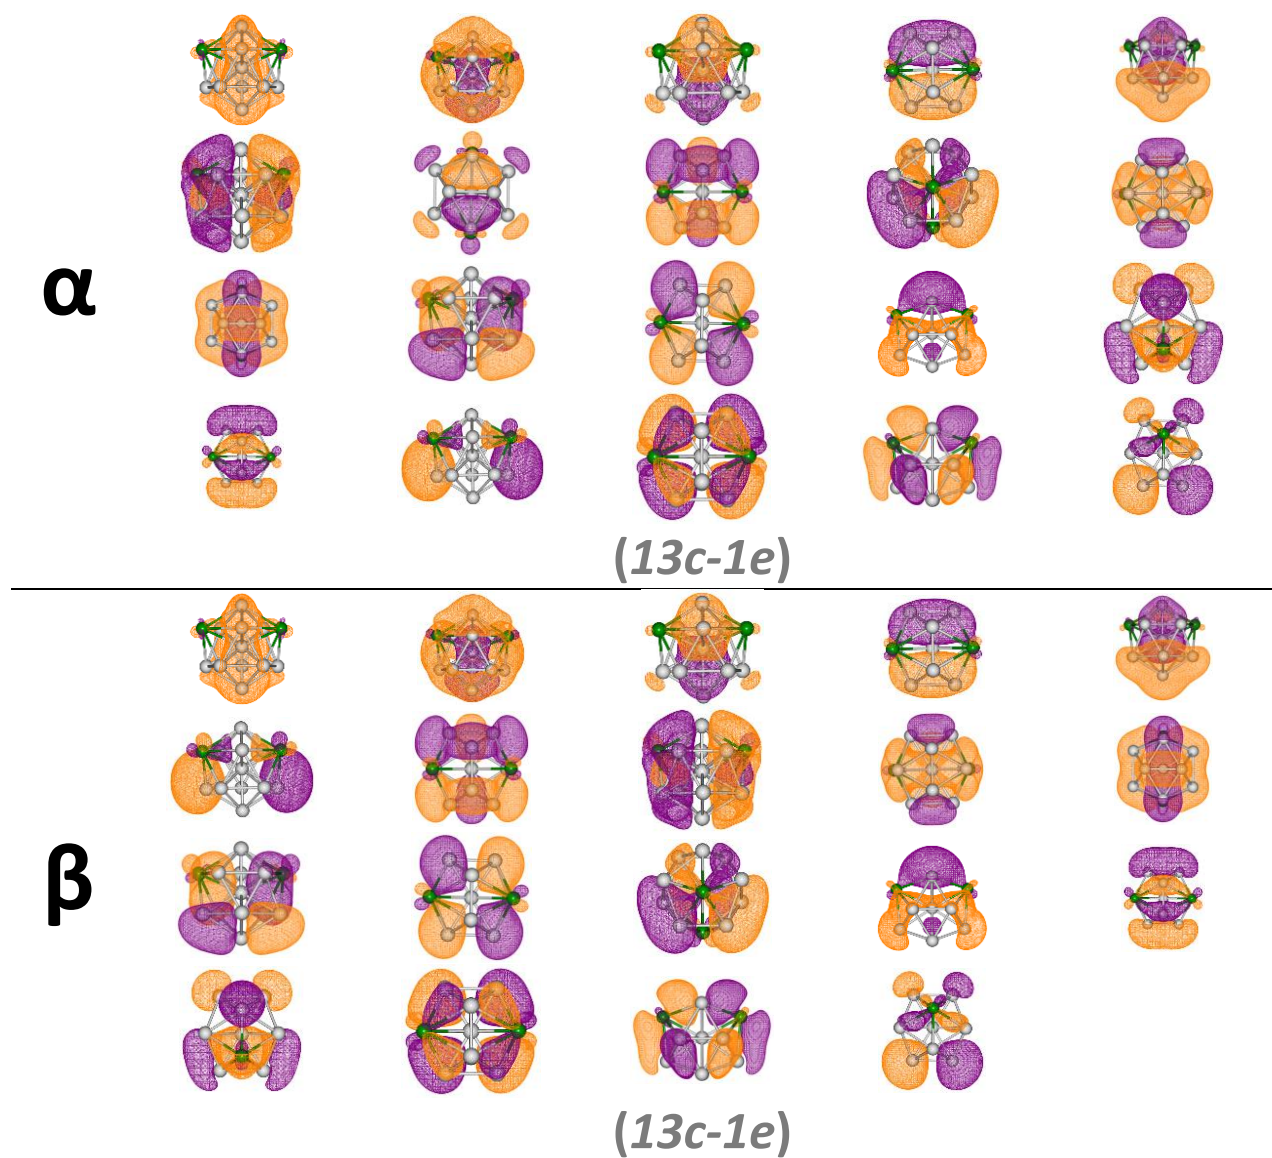

**Figure S34:** The metallic aromaticity arising from *(13c-1e)* delocalized bonds in the neutral icosahedral **n.13.C.2** isomer via AdNDP analysis.

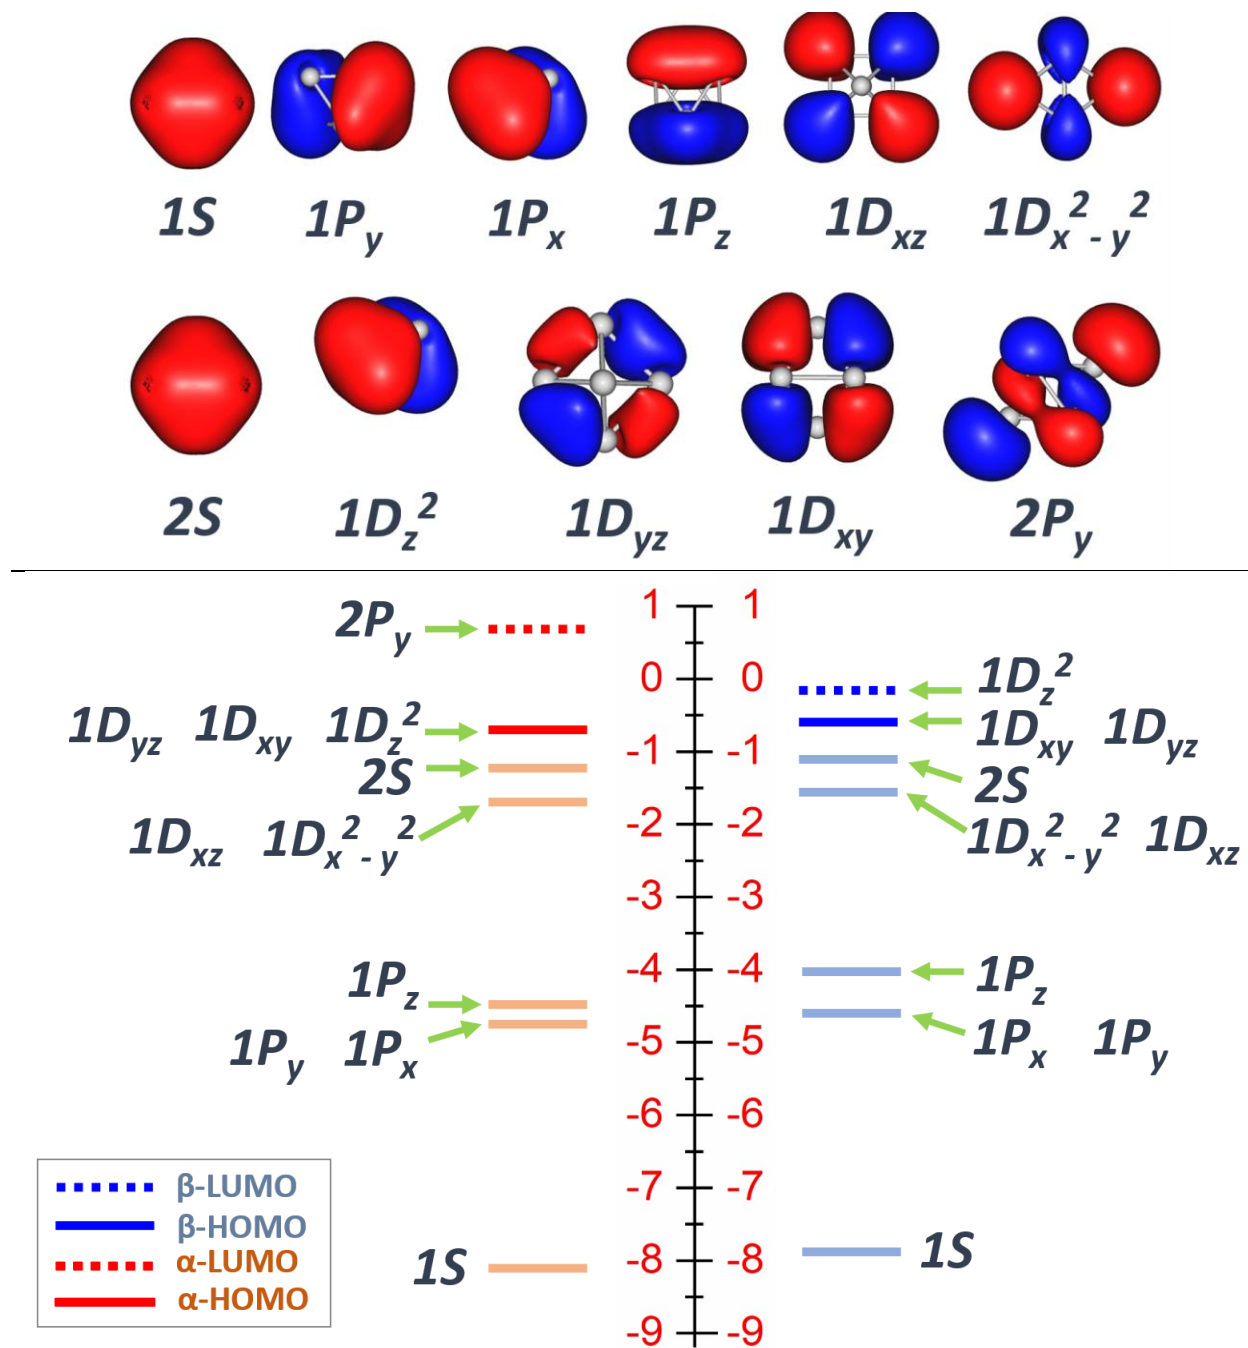

**Figure S35:** Energy levels of molecular orbitals (MOs) of the a.6.A.1 at doublet state, PBE/ Def2-TZVP.

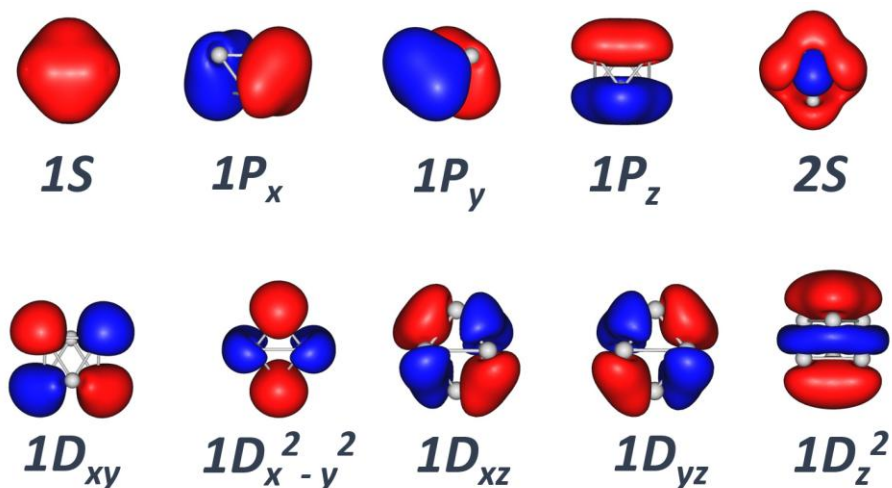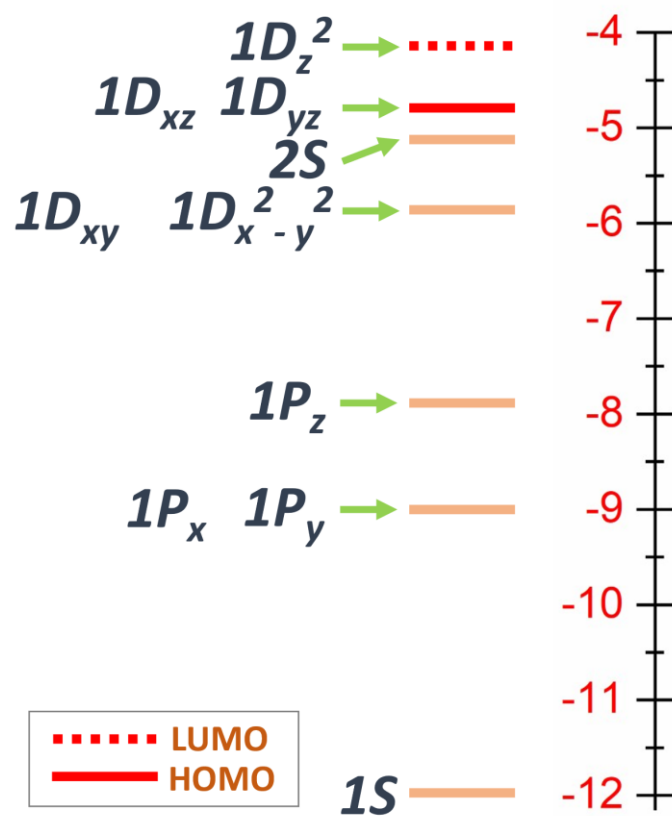

**Figure S36:** Energy levels of molecular orbitals (MOs) of the **n.6.A.1** at singlet state, PBE/ Def2-TZVP.

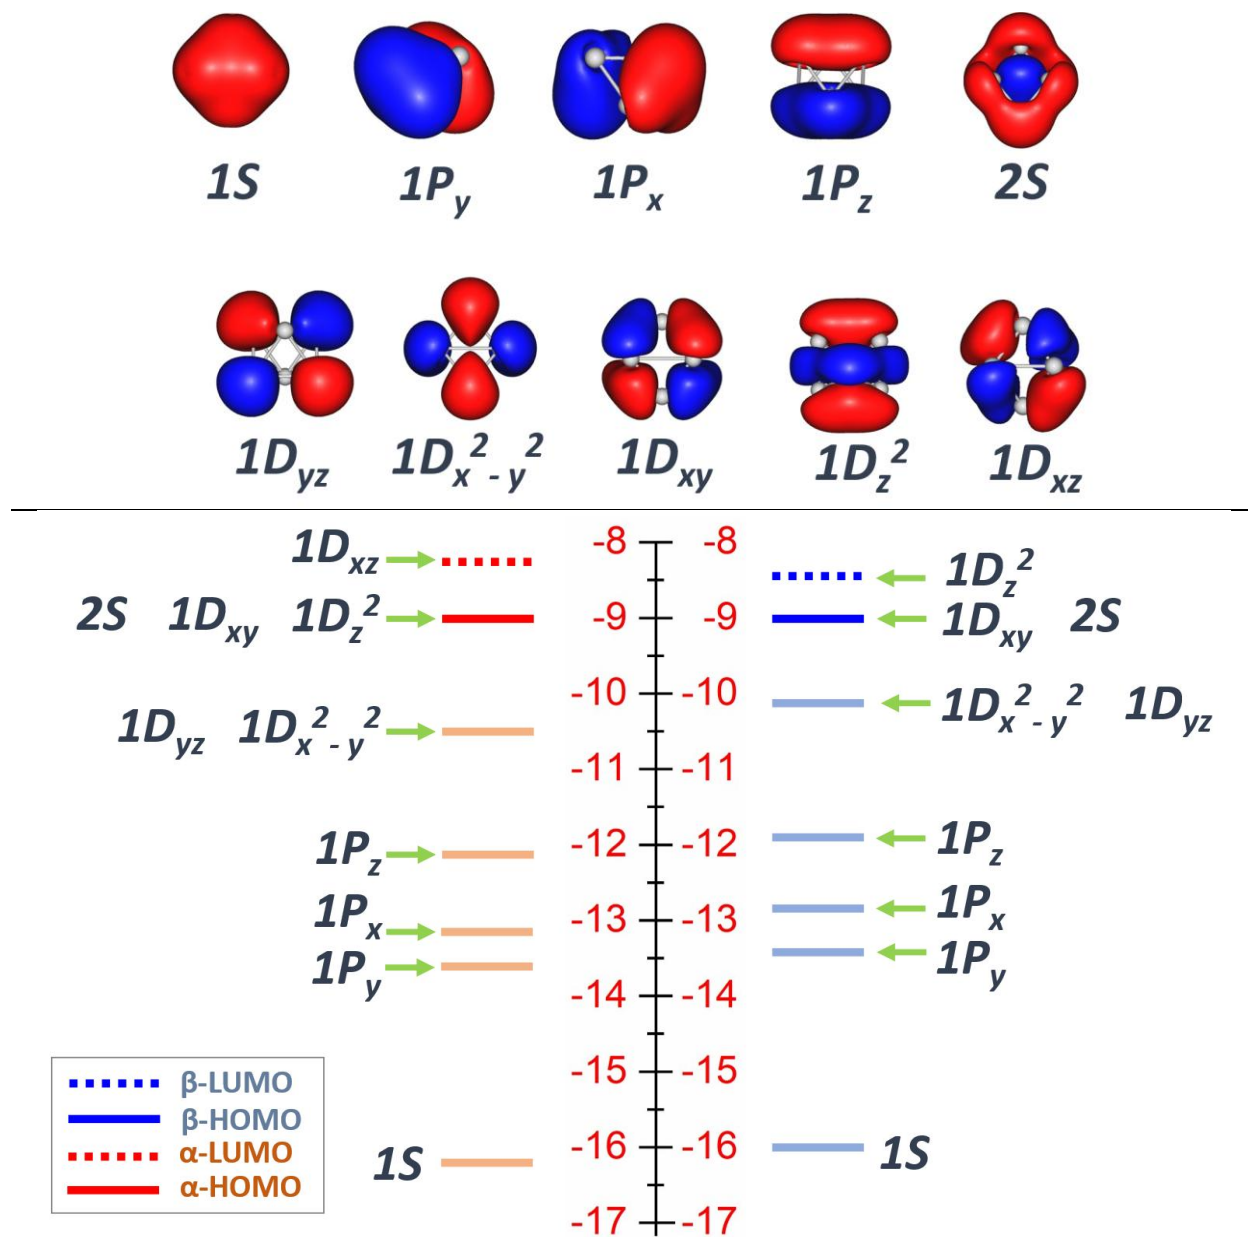

**Figure S37:** Energy levels of molecular orbitals (MOs) of the c.6.A.1 at doublet state, PBE/ Def2-TZVP.

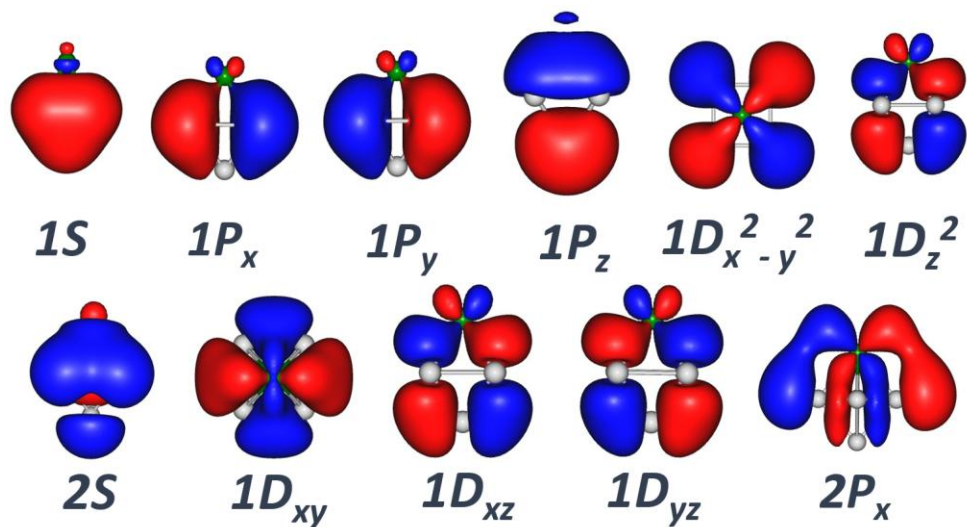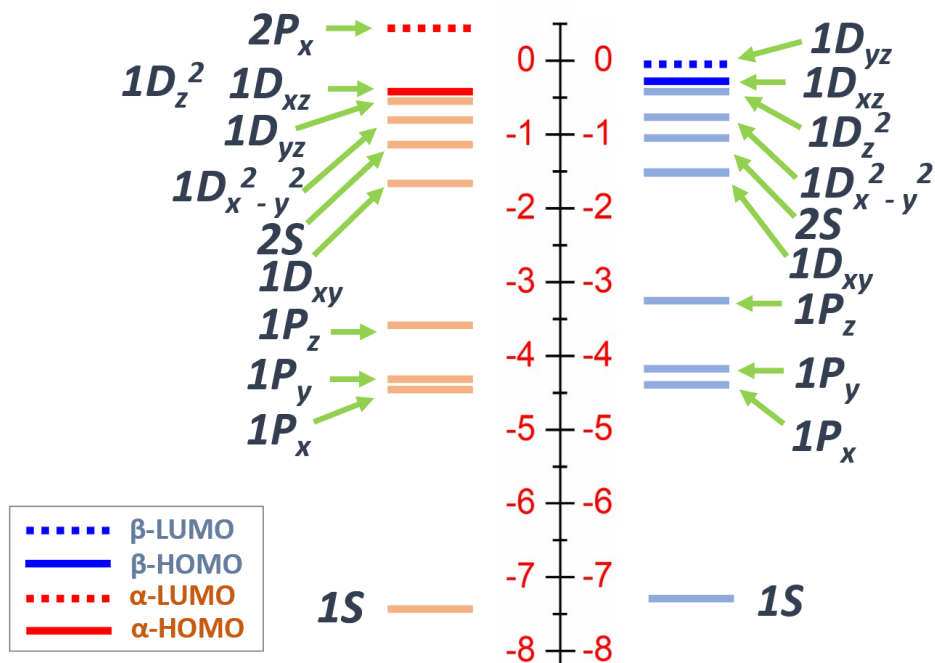

**Figure S38:** Energy levels of molecular orbitals (MOs) of the **a.6.B.1** at doublet state, PBE/ Def2-TZVP.

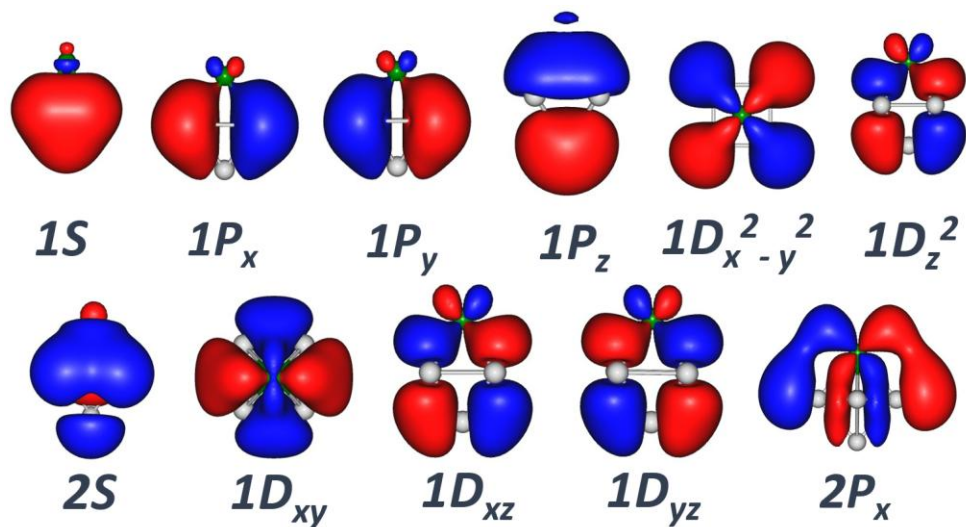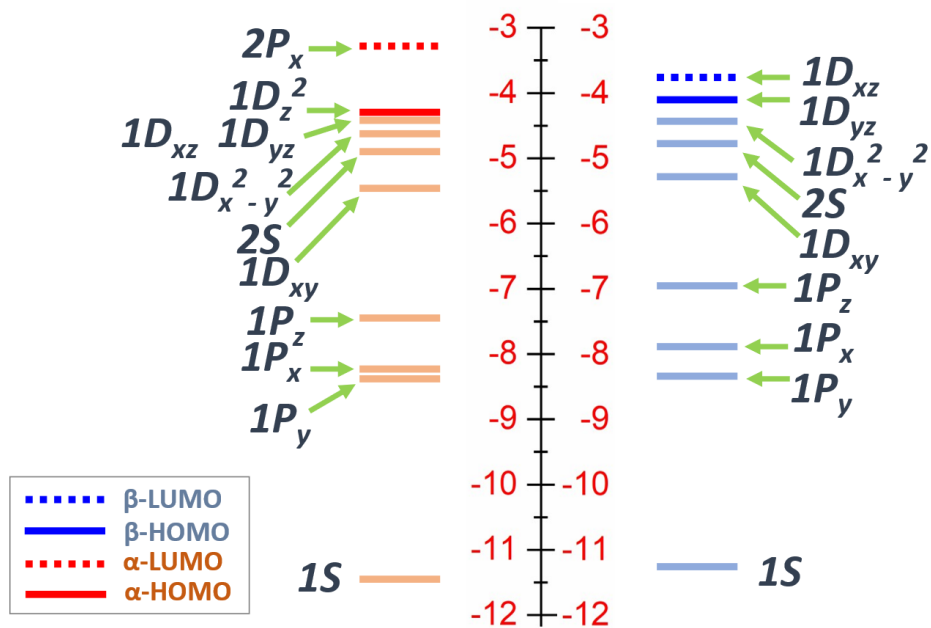

**Figure S39:** Energy levels of molecular orbitals (MOs) of the **n.6.B.1** at triplet state, PBE/ Def2-TZVP.

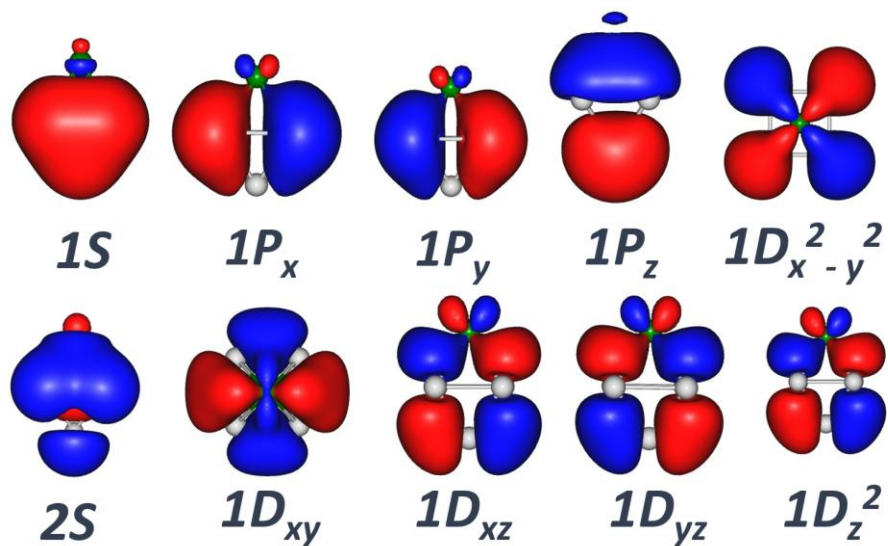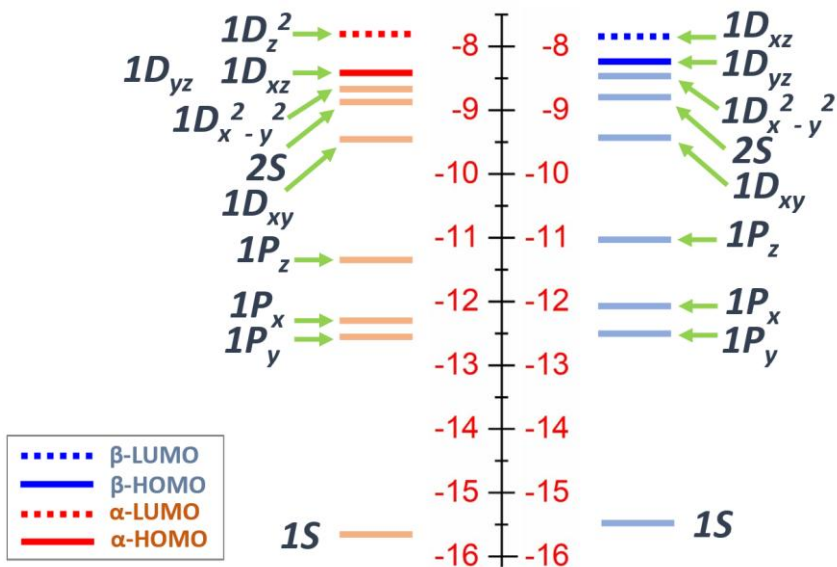

**Figure S40:** Energy levels of molecular orbitals (MOs) of the **c.6.B.2** at doublet state, PBE/ Def2-TZVP.

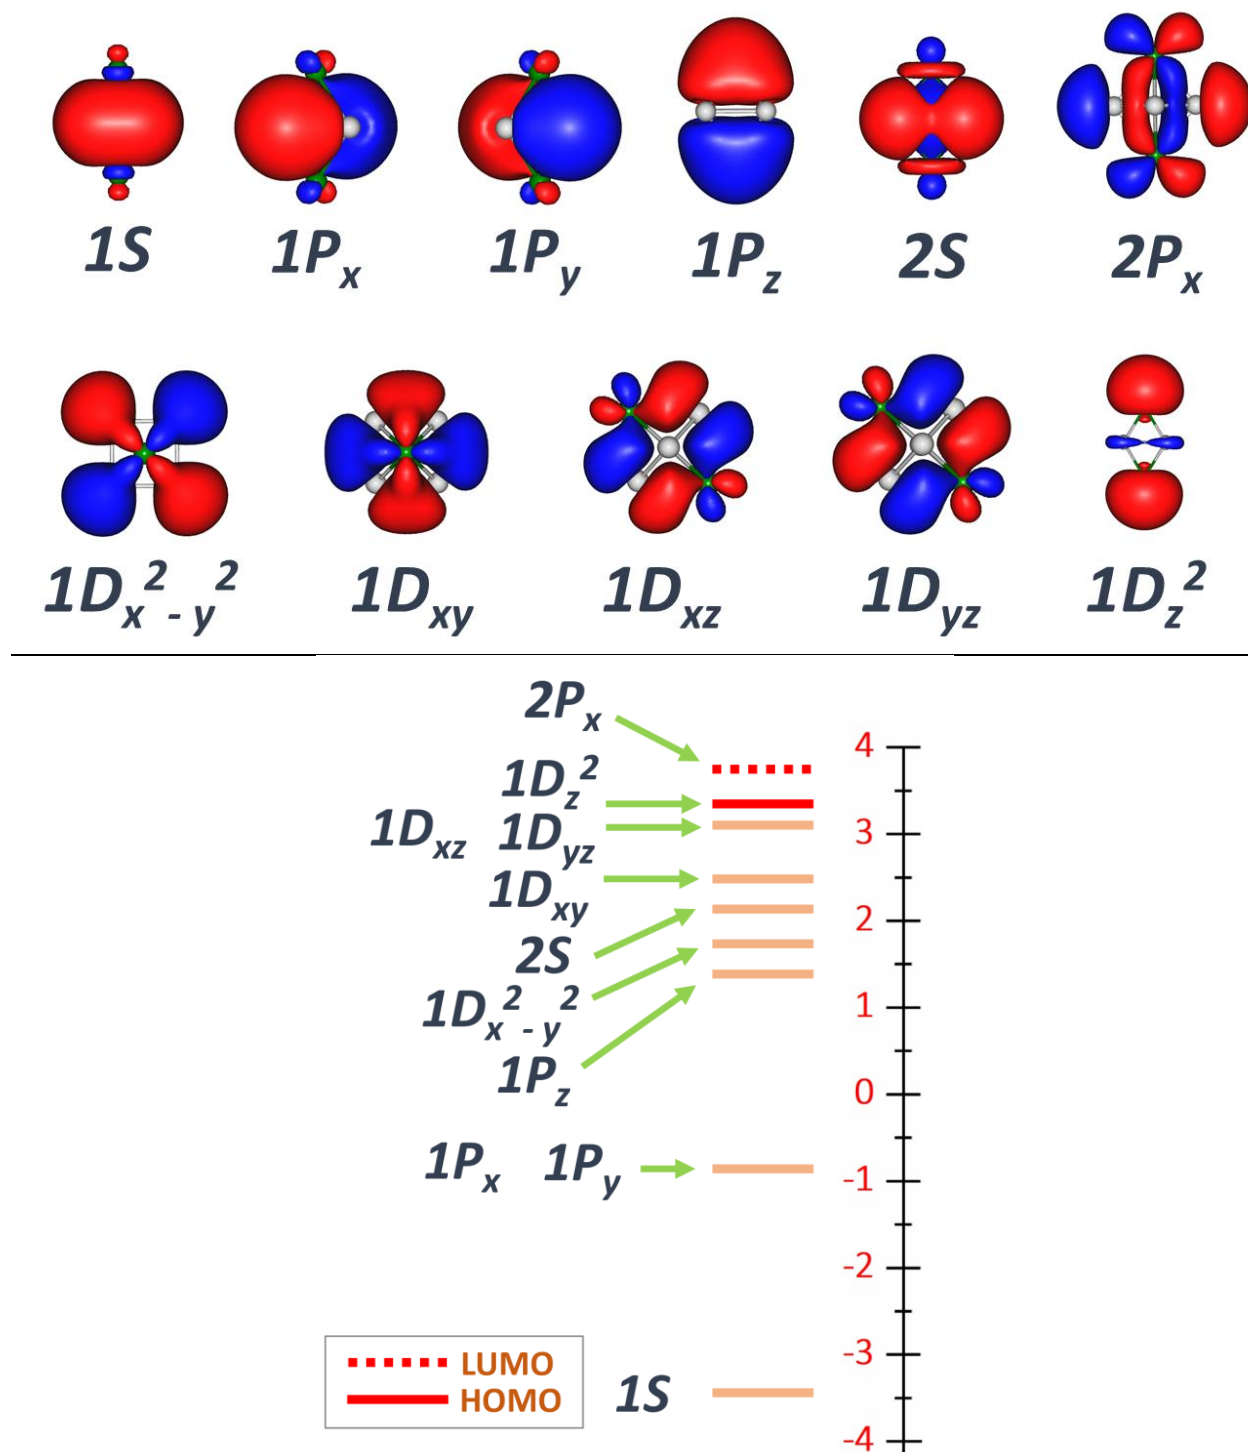

**Figure S41:** Energy levels of molecular orbitals (MOs) of the **da.6.C.2** at singlet state, PBE/ Def2-TZVP.

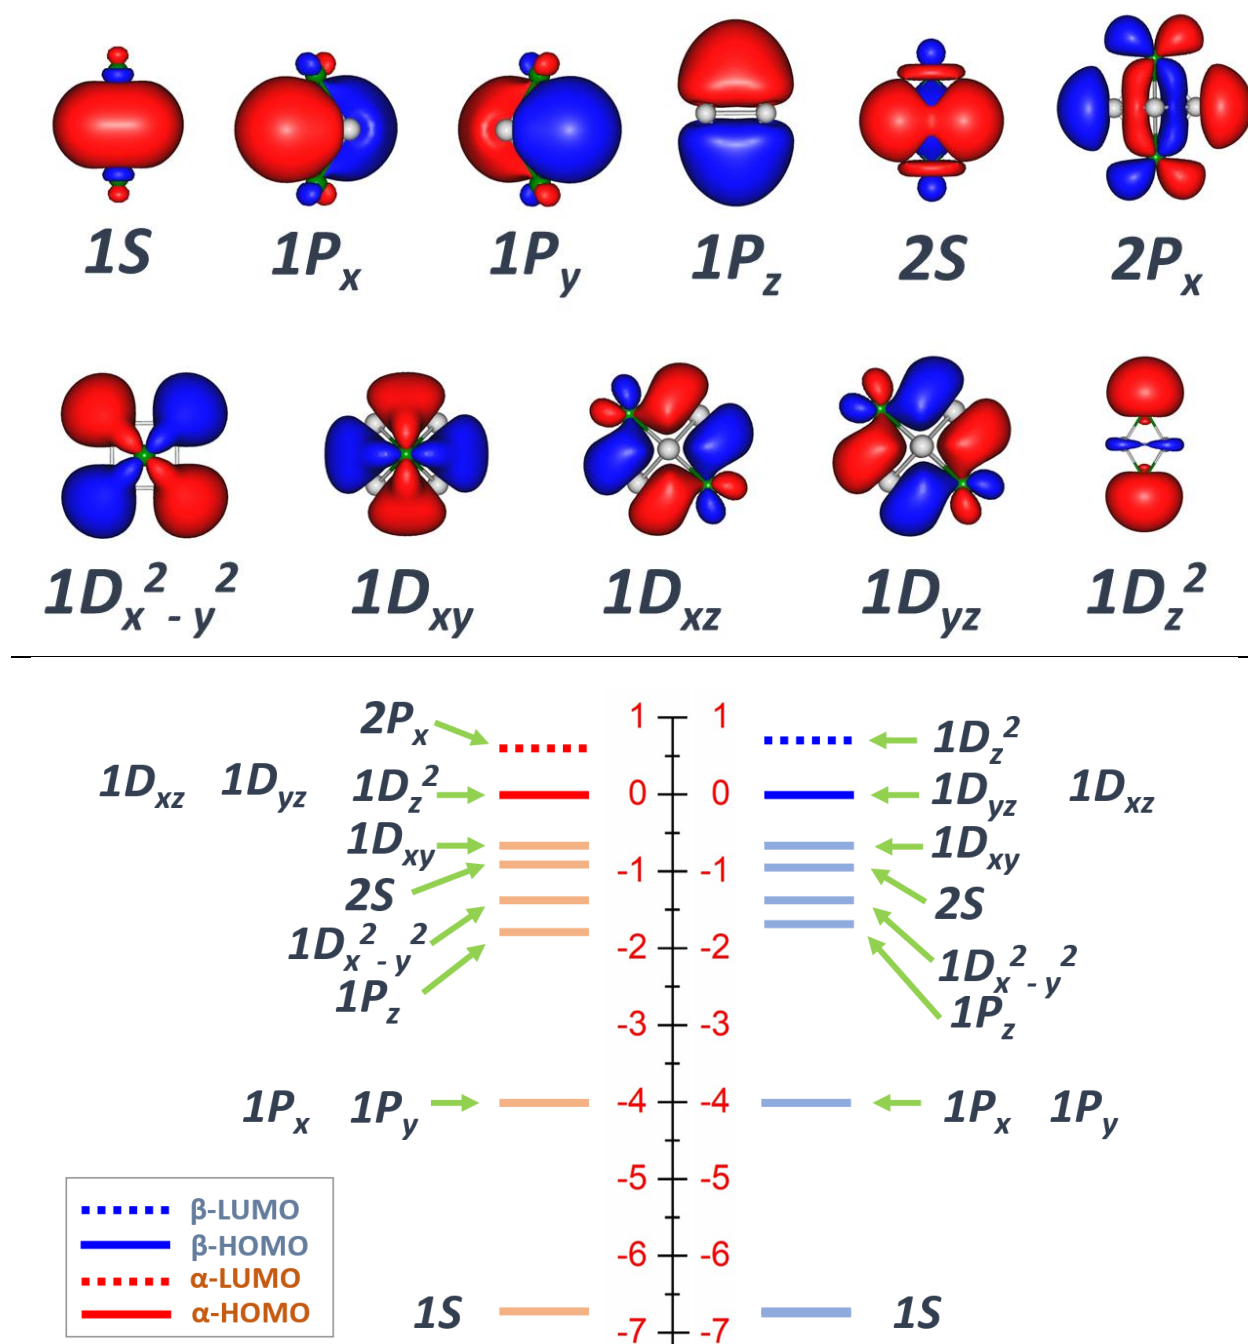

**Figure S42:** Energy levels of molecular orbitals (MOs) of the a.6.C.1 at doublet state, PBE/ Def2-TZVP.

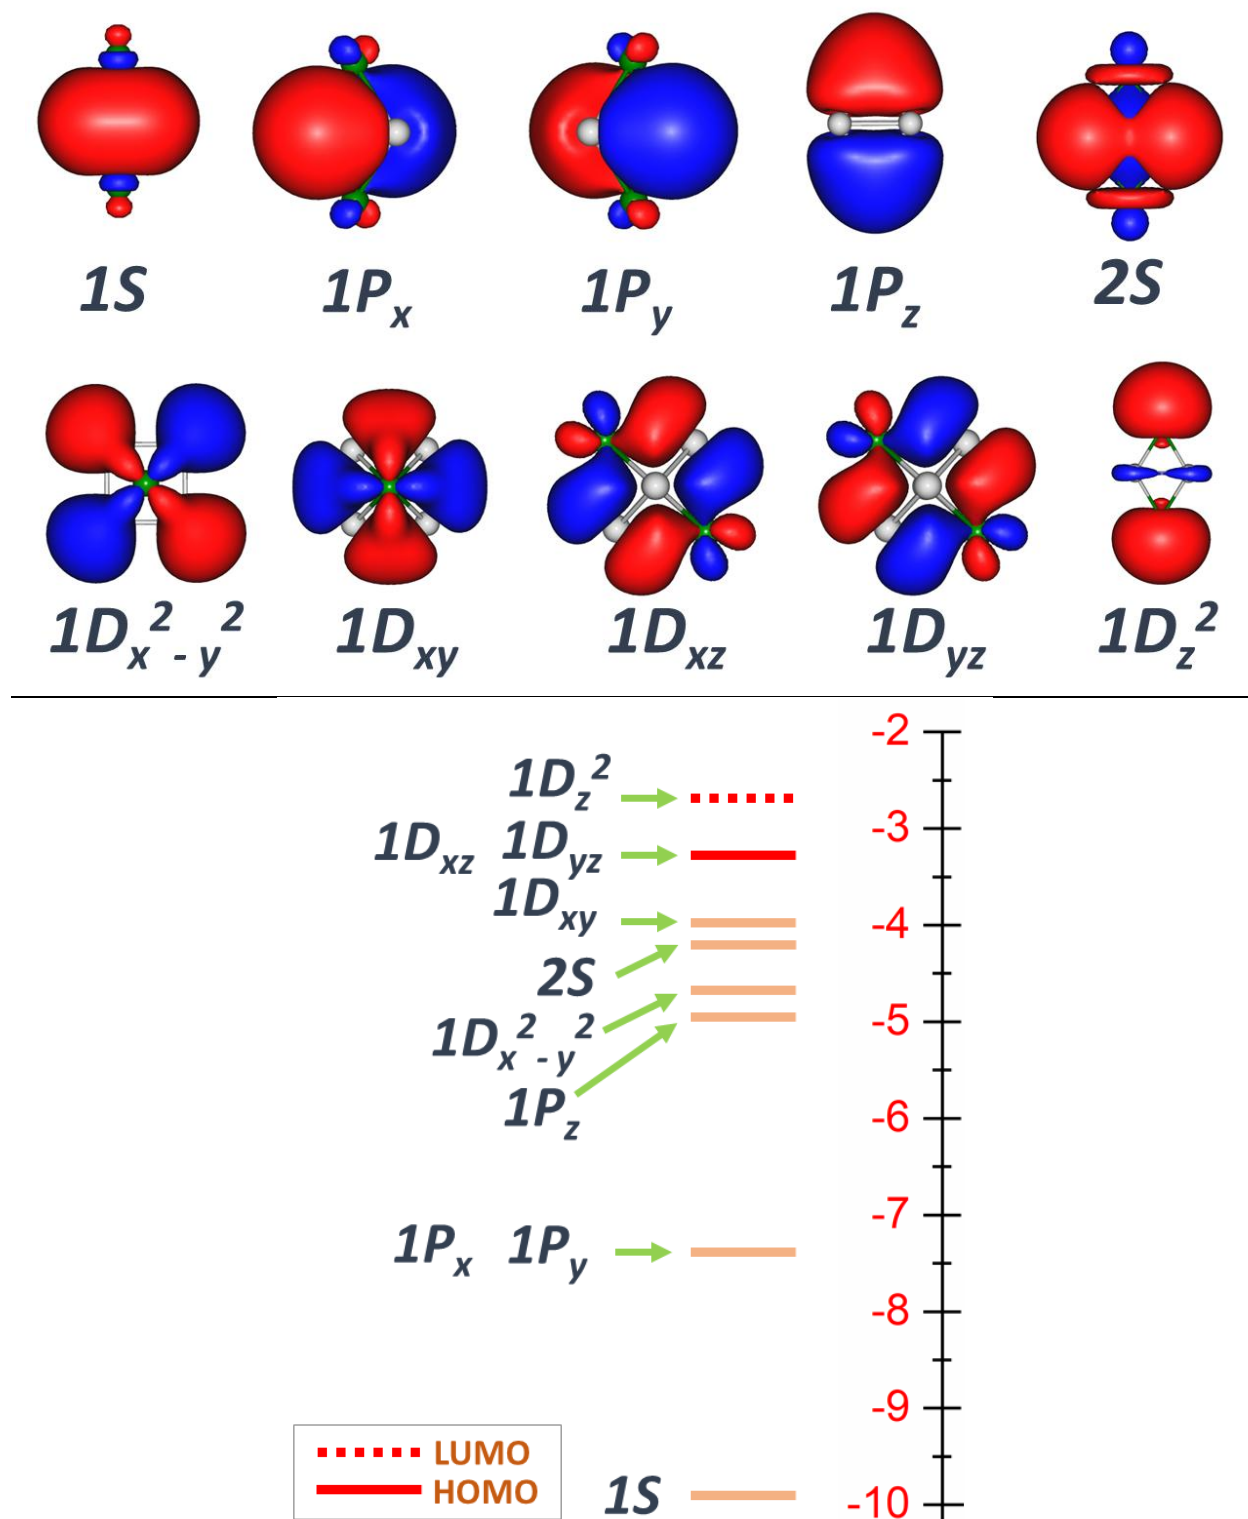

**Figure S43:** Energy levels of molecular orbitals (MOs) of the **n.6.C.1** at singlet state, PBE/ Def2-TZVP.

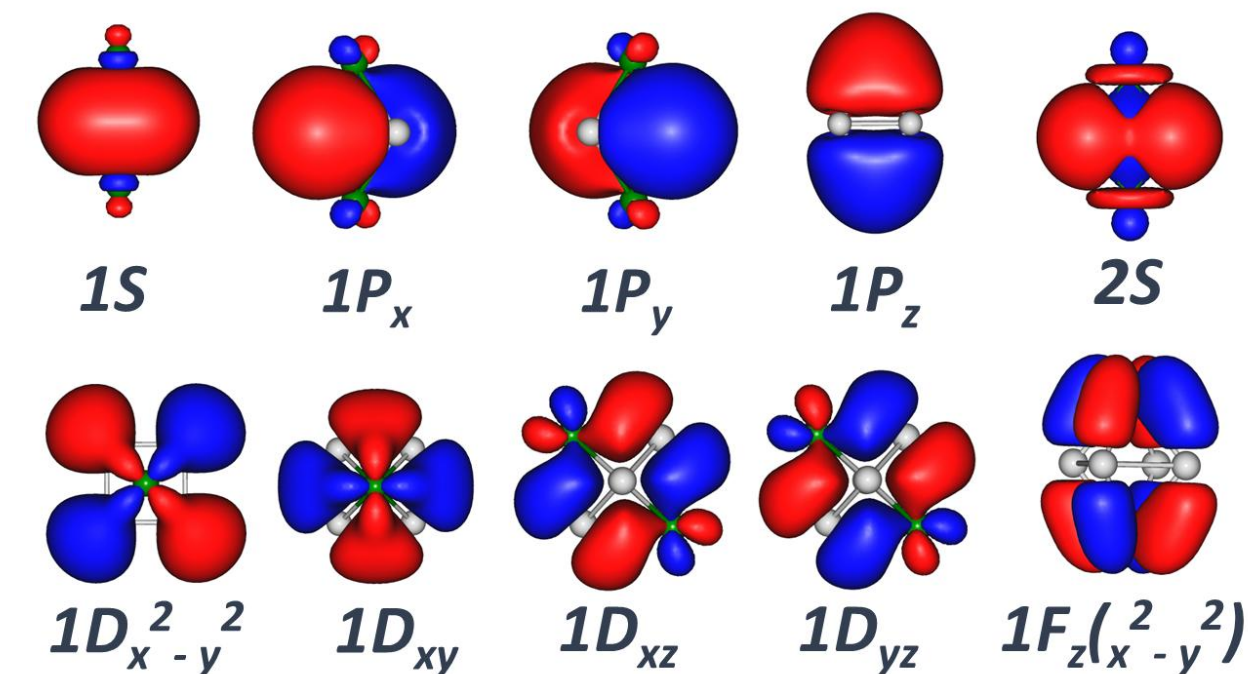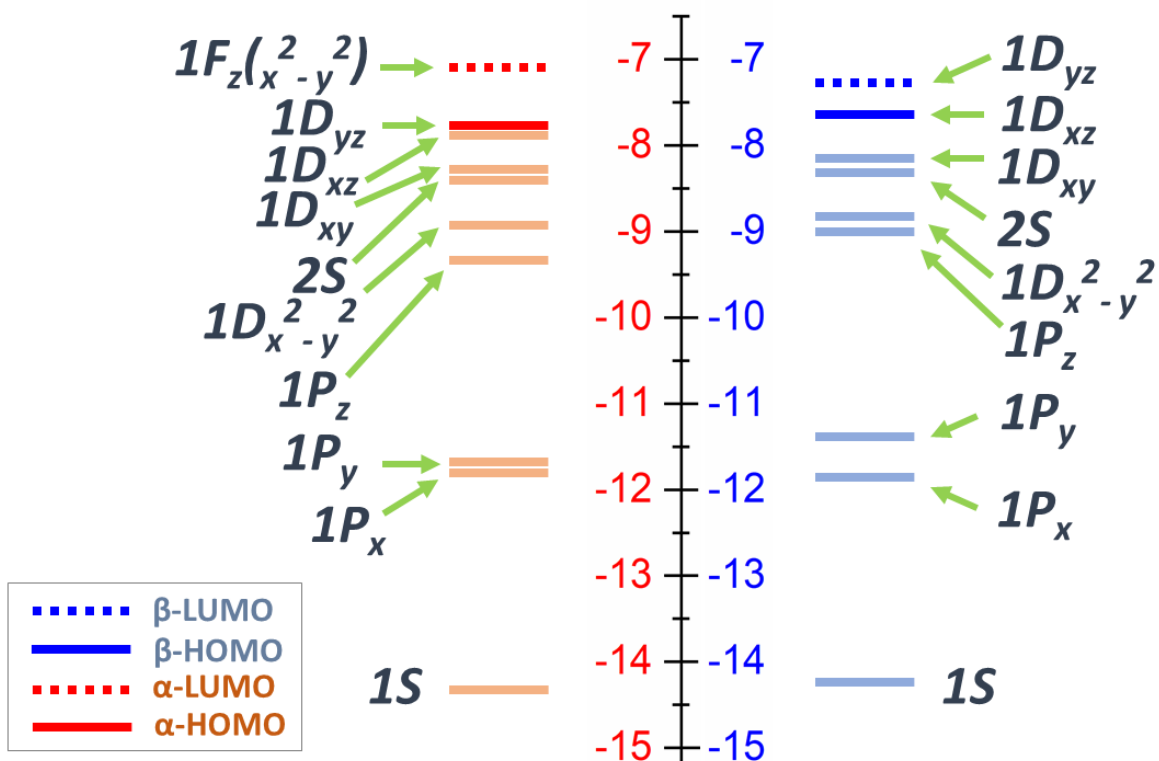

**Figure S44:** Energy levels of molecular orbitals (MOs) of the **c.6.C.1** at singlet state, PBE/ Def2-TZVP.

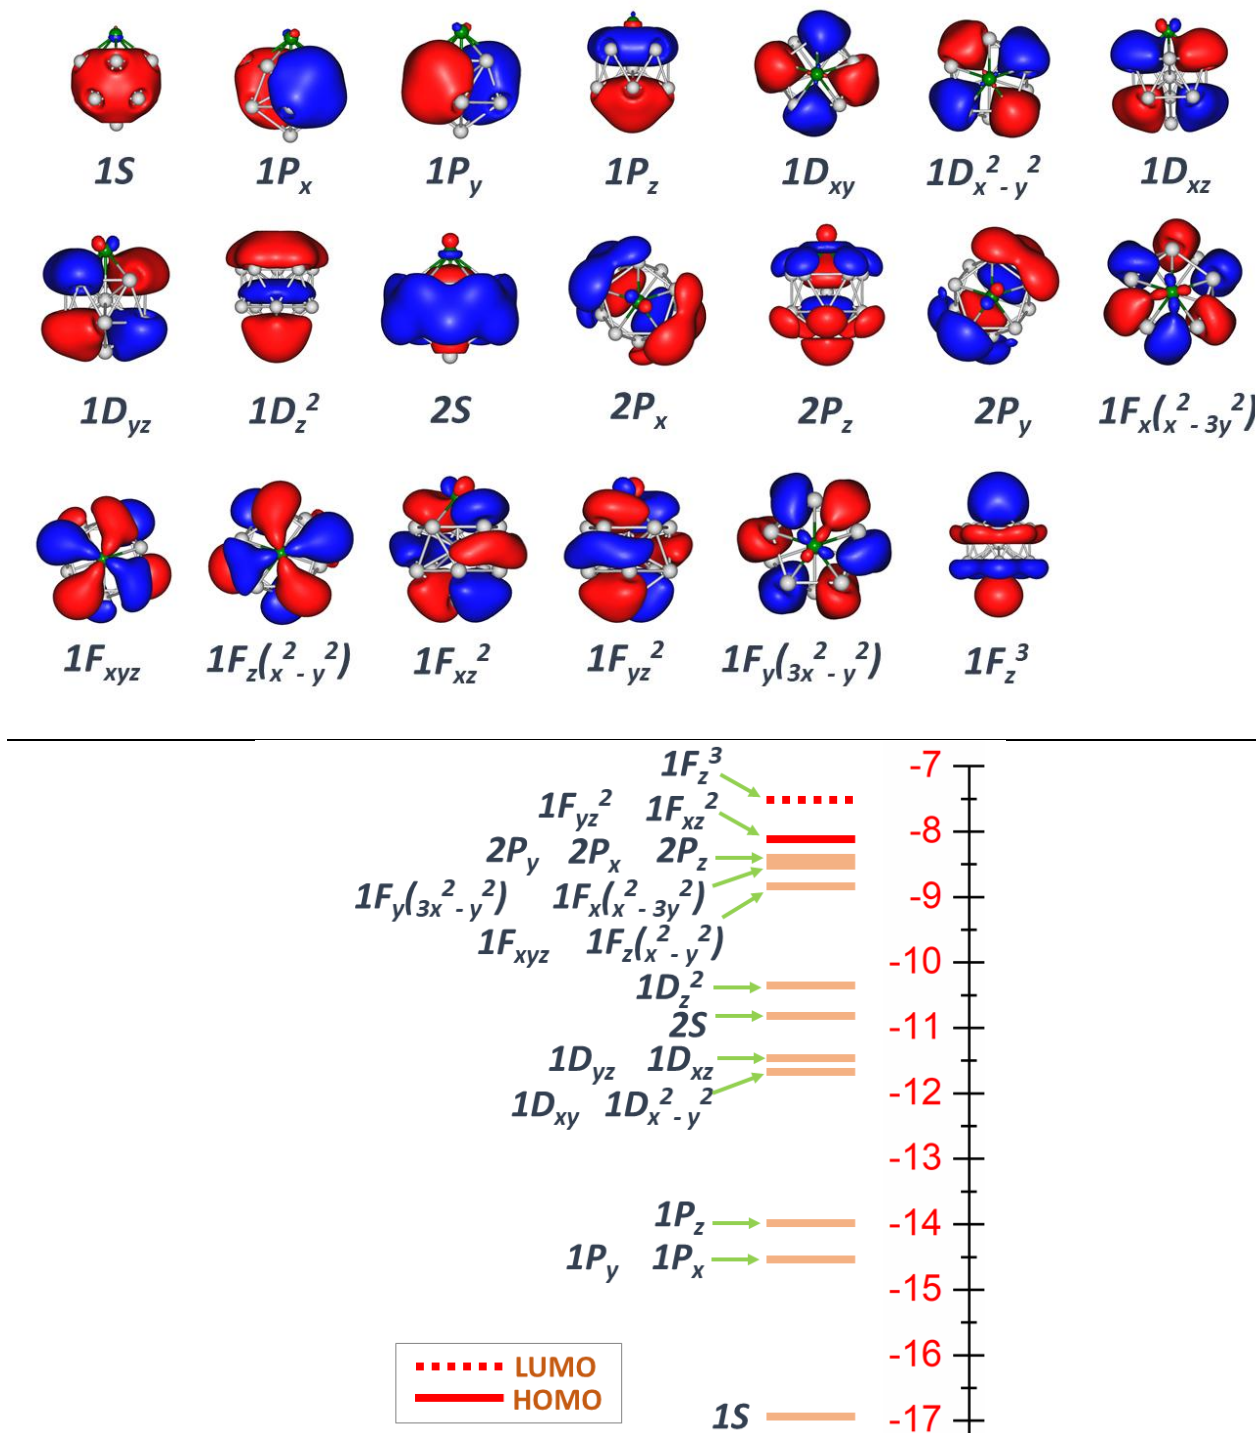

**Figure S45:** Energy levels of molecular orbitals (MOs) of the c.13.B.1 at singlet state, PBE/ Def2-TZVP.

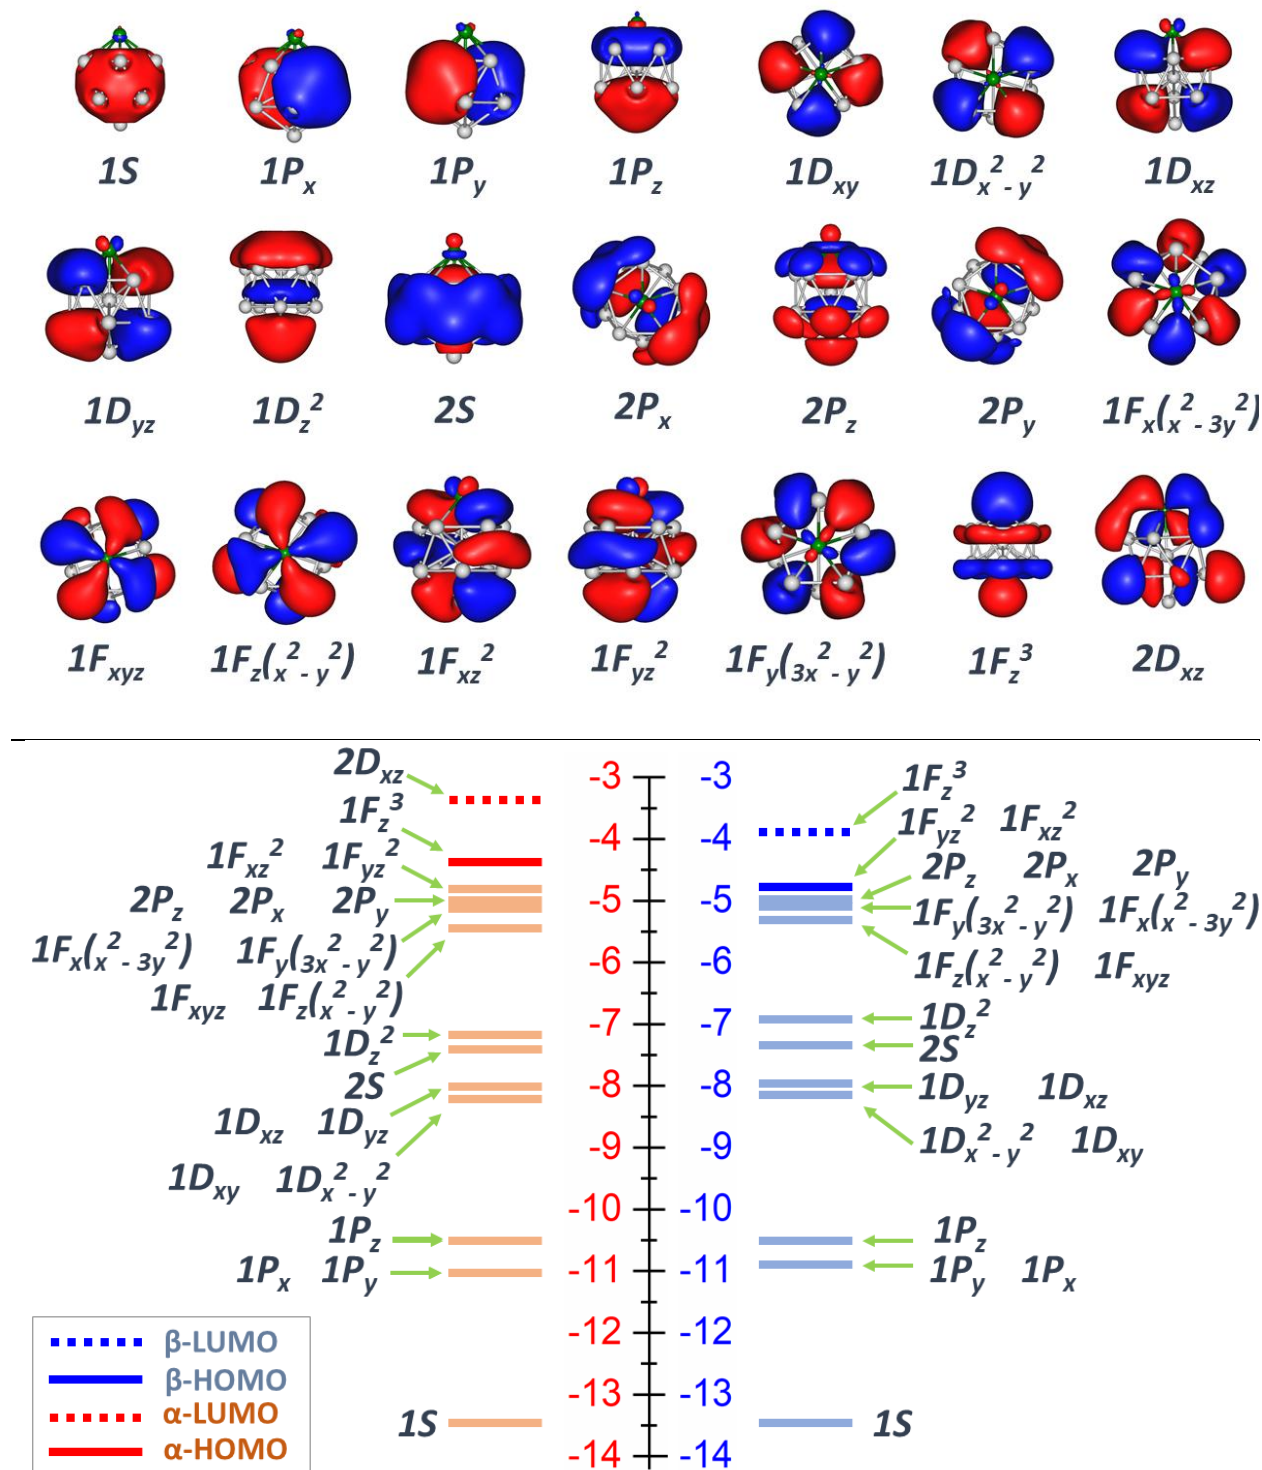

**Figure S46:** Energy levels of molecular orbitals (MOs) of the **n.13.B.1** at doublet state, PBE/Def2-TZVP.

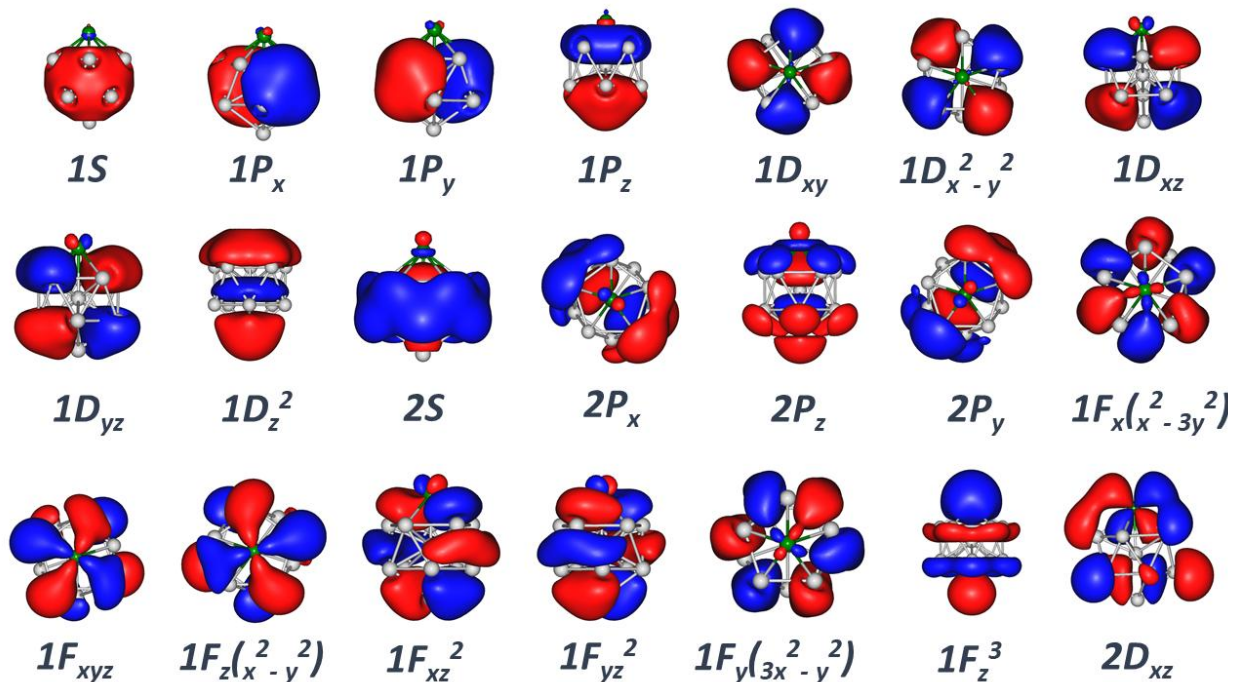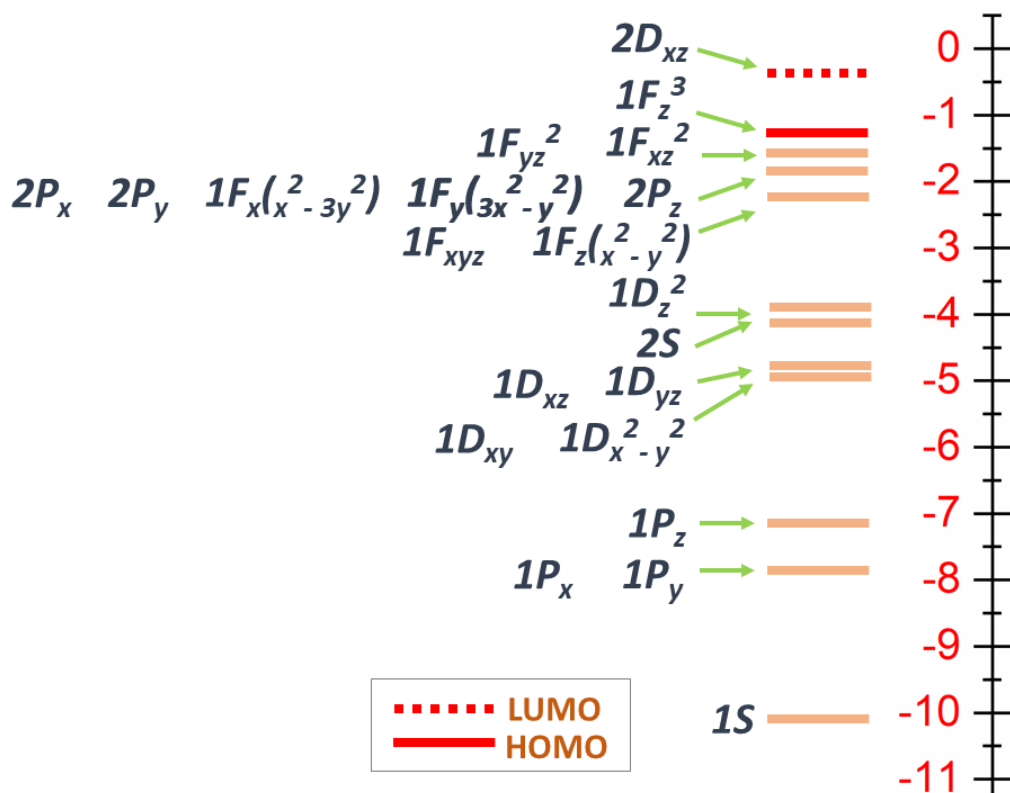

**Figure S47:** Energy levels of molecular orbitals (MOs) of the **a.13.B.1** at singlet state, PBE/Def2-TZVP.

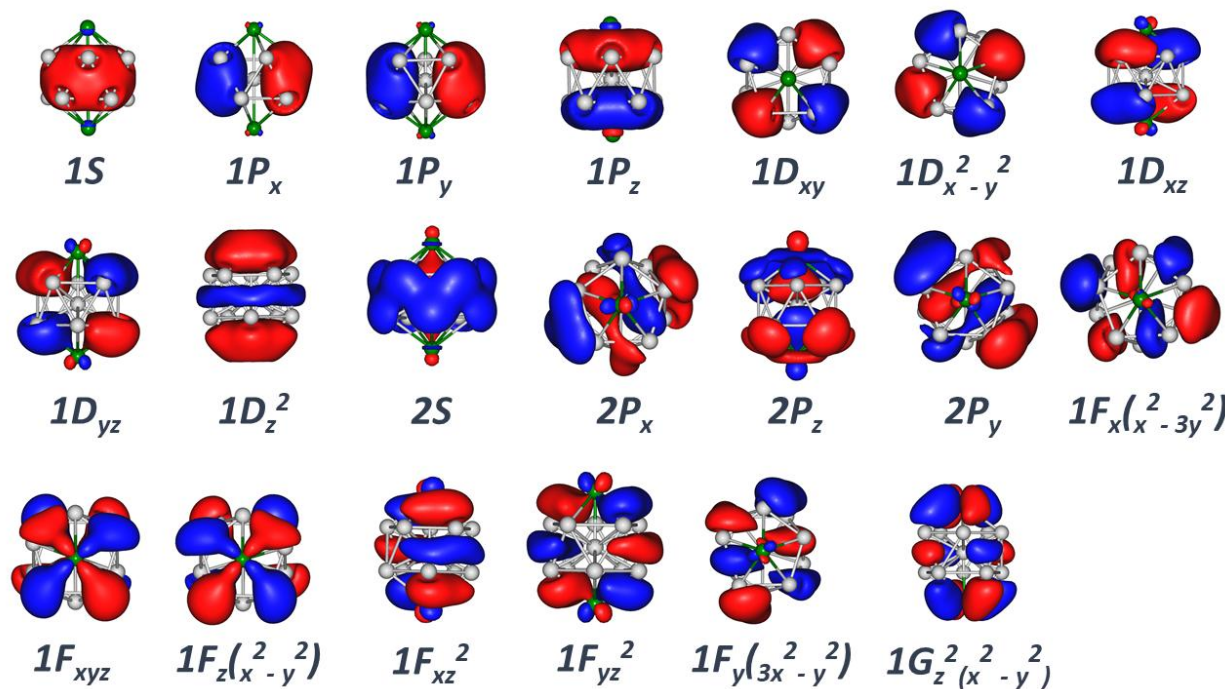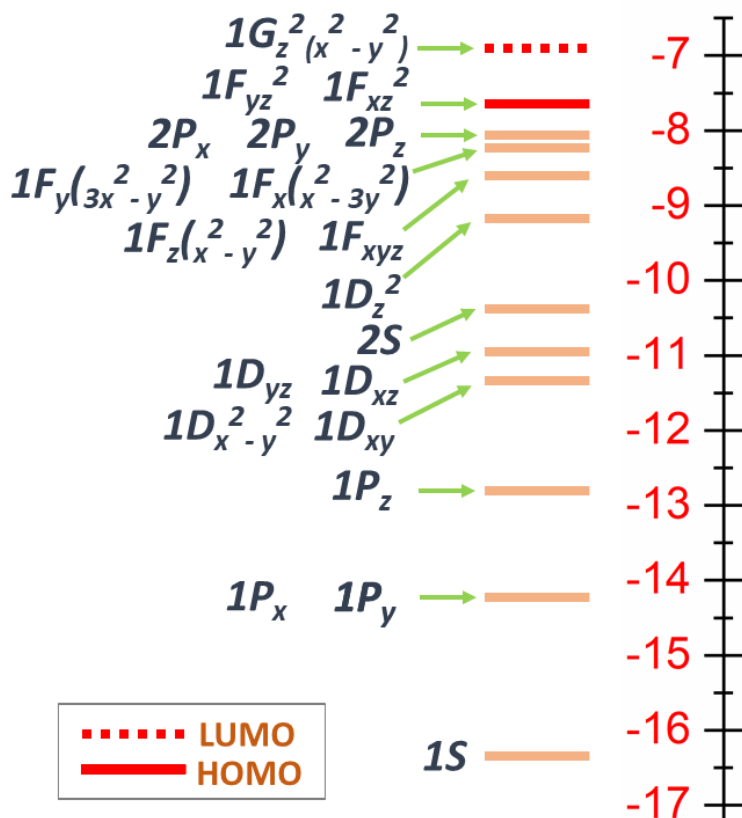

**Figure S48:** Energy levels of molecular orbitals (MOs) of the **c.13.C.1** at singlet state, PBE/Def2-TZVP.

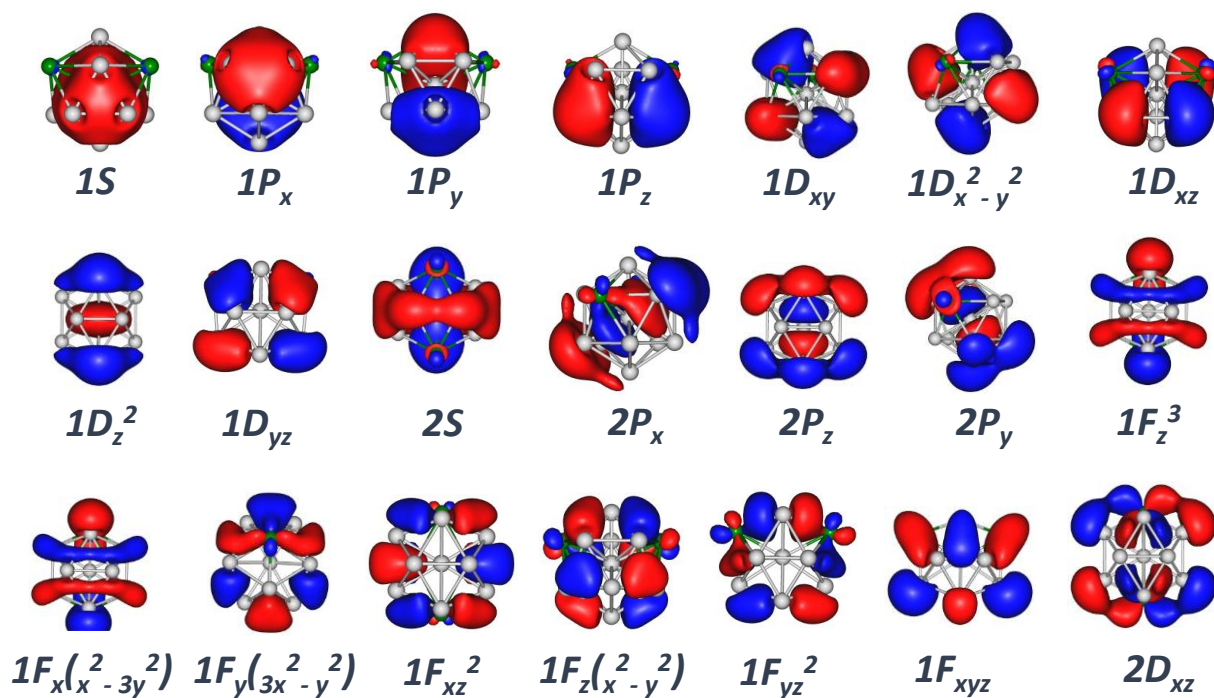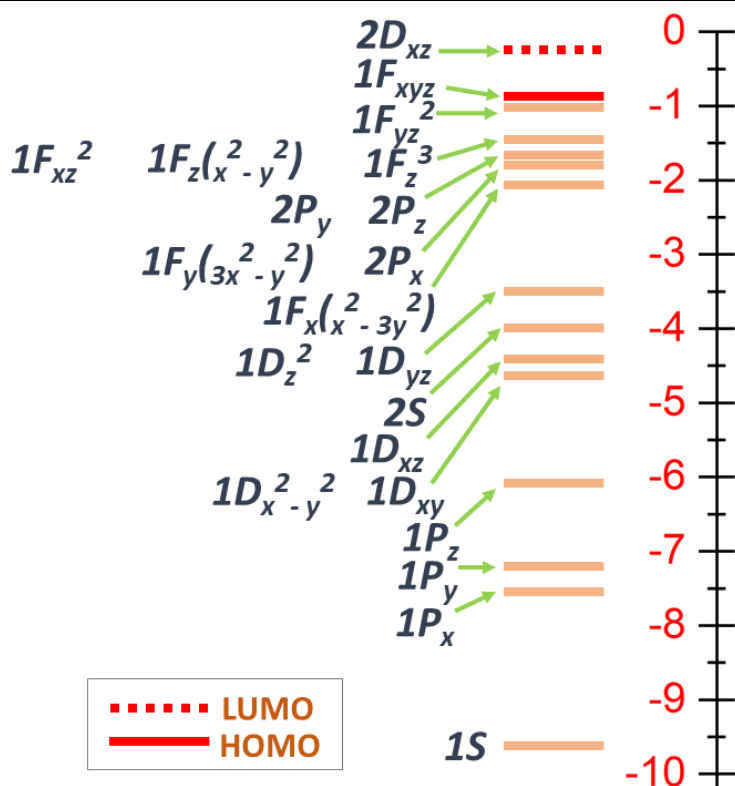

**Figure S49:** Energy levels of molecular orbitals (MOs) of the **a.13.C.1** at singlet state, PBE/Def2-TZVP.

### Coordinates of the lowest-lying $\text{ScAl}_{n-1}^{+0/-}$ clusters with $n = 3 - 15$

| Isomer         | Spin state | Coordinate |              |              |              |
|----------------|------------|------------|--------------|--------------|--------------|
| <b>c.3.B.1</b> | triplet    | 13         | 1.285189000  | -1.127385000 | -0.000000000 |
|                |            | 13         | -1.285189000 | -1.127385000 | 0.000000000  |
|                |            | 21         | 0.000000000  | 1.395811000  | 0.000000000  |
| <b>n.3.B.1</b> | doublet    | 13         | 0.000000000  | 1.236675000  | -1.058706000 |
|                |            | 13         | -0.000000000 | -1.236675000 | -1.058706000 |
|                |            | 21         | -0.000000000 | -0.000000000 | 1.310779000  |
| <b>a.3.B.1</b> | singlet    | 13         | 0.000000000  | 1.258634000  | -1.033006000 |
|                |            | 13         | -0.000000000 | -1.258634000 | -1.033006000 |
|                |            | 21         | 0.000000000  | 0.000000000  | 1.278960000  |

| Isomer         | Spin state | Coordinate |              |              |              |
|----------------|------------|------------|--------------|--------------|--------------|
| <b>c.4.B.1</b> | doublet    | 13         | 0.785886000  | 1.354658000  | 0.753172000  |
|                |            | 13         | 0.786553000  | -1.354483000 | 0.753066000  |
|                |            | 13         | 0.905640000  | 0.000204000  | -1.432509000 |
|                |            | 21         | -1.534048000 | -0.000234000 | -0.045642000 |
| <b>n.4.B.1</b> | triplet    | 13         | -1.706246000 | -0.243079000 | 0.000000000  |
|                |            | 13         | 0.471940000  | -0.990143000 | 1.329292000  |
|                |            | 13         | 0.471940000  | -0.990143000 | -1.329292000 |
|                |            | 21         | 0.471940000  | 1.376368000  | 0.000000000  |
| <b>a.4.B.1</b> | doublet    | 13         | -1.657815000 | -0.254939000 | -0.000000000 |
|                |            | 13         | 0.458545000  | -0.941848000 | 1.459738000  |
|                |            | 13         | 0.458545000  | -0.941848000 | -1.459738000 |
|                |            | 21         | 0.458545000  | 1.323916000  | 0.000000000  |

| Isomer         | Spin state | Coordinate |              |              |              |
|----------------|------------|------------|--------------|--------------|--------------|
| <b>c.5.B.1</b> | singlet    | 13         | 1.797108000  | -0.508549000 | 0.580162000  |
|                |            | 13         | 0.507534000  | 1.796559000  | 0.582088000  |
|                |            | 13         | -1.798077000 | 0.506741000  | 0.579552000  |
|                |            | 13         | -0.508001000 | -1.797753000 | 0.578548000  |
|                |            | 21         | 0.000889000  | 0.001858000  | -1.436407000 |
| <b>n.5.B.1</b> | doublet    | 13         | 1.951964000  | -0.011363000 | -0.559868000 |
|                |            | 13         | -0.012634000 | -1.753082000 | -0.614478000 |
|                |            | 13         | 0.012689000  | 1.753101000  | -0.614427000 |
|                |            | 13         | -1.951919000 | 0.011381000  | -0.560019000 |
|                |            | 21         | -0.000062000 | -0.000024000 | 1.454014000  |
| <b>a.5.B.1</b> | triplet    | 13         | 0.000000000  | 1.868768000  | -0.589313000 |
|                |            | 13         | -0.000000000 | -1.868768000 | -0.589313000 |
|                |            | 13         | -1.868769000 | 0.000000000  | -0.589308000 |
|                |            | 13         | 1.868769000  | -0.000000000 | -0.589308000 |
|                |            | 21         | 0.000000000  | 0.000000000  | 1.459246000  |

| Isomer         | Spin state | Coordinate |              |              |              |
|----------------|------------|------------|--------------|--------------|--------------|
| <b>c.6.B.1</b> | doublet    | 13         | -0.790333000 | -1.385486000 | 0.449245000  |
|                |            | 13         | -2.985531000 | 0.000030000  | -0.250364000 |
|                |            | 13         | 1.106881000  | -1.288859000 | -1.298943000 |
|                |            | 13         | -0.790343000 | 1.385374000  | 0.449598000  |
|                |            | 13         | 1.106949000  | 1.289412000  | -1.298280000 |
|                |            | 21         | 1.456234000  | -0.000291000 | 1.206365000  |
| <b>n.6.B.1</b> | triplet    | 13         | -0.000000000 | 1.865071000  | -0.215716000 |
|                |            | 13         | -0.000000000 | 0.000000000  | -2.157205000 |
|                |            | 13         | 1.861233000  | -0.120034000 | -0.215638000 |
|                |            | 13         | -1.861233000 | 0.120034000  | -0.215638000 |
|                |            | 13         | 0.000000000  | -1.865071000 | -0.215716000 |
|                |            | 21         | 0.000000000  | -0.000000000 | 1.869470000  |
| <b>a.6.B.1</b> | doublet    | 13         | -0.206587000 | -1.251968000 | 1.360868000  |
|                |            | 13         | -2.312175000 | -0.121449000 | -0.000000000 |
|                |            | 13         | -0.206587000 | -1.251968000 | -1.360868000 |
|                |            | 13         | -0.206587000 | 1.296156000  | -1.330396000 |
|                |            | 13         | -0.206587000 | 1.296156000  | 1.330396000  |
|                |            | 21         | 1.942894000  | 0.020474000  | 0.000000000  |

| Isomer         | Spin state | Coordinate |              |              |              |
|----------------|------------|------------|--------------|--------------|--------------|
| <b>c.7.B.1</b> | singlet    | 13         | 1.887749000  | -1.278058000 | 0.000712000  |
|                |            | 13         | -0.485227000 | -2.263953000 | -0.000102000 |
|                |            | 13         | 1.888214000  | 1.277397000  | -0.000711000 |
|                |            | 13         | -0.484420000 | 2.264113000  | 0.000123000  |
|                |            | 13         | 0.180160000  | 0.000372000  | 1.640950000  |
|                |            | 13         | 0.180161000  | -0.000426000 | -1.640965000 |
|                |            | 21         | -1.960299000 | 0.000343000  | -0.000005000 |
| <b>n.7.B.1</b> | doublet    | 13         | -1.946055000 | -1.234222000 | -0.138254000 |
|                |            | 13         | -1.945909000 | 1.234656000  | 0.138200000  |
|                |            | 13         | -0.138583000 | -0.026193000 | 1.698722000  |
|                |            | 13         | 0.424626000  | -2.143324000 | 0.058806000  |
|                |            | 13         | -0.138760000 | 0.026119000  | -1.698384000 |
|                |            | 13         | 0.425367000  | 2.143443000  | -0.058957000 |
|                |            | 21         | 2.054814000  | -0.000296000 | -0.000082000 |
| <b>a.7.B.1</b> | singlet    | 13         | -0.152172000 | -1.279090000 | 1.363197000  |
|                |            | 13         | -0.152011000 | 1.279738000  | 1.362568000  |
|                |            | 13         | 2.111354000  | 1.259525000  | -0.000076000 |
|                |            | 13         | -0.151896000 | 1.279218000  | -1.363048000 |
|                |            | 13         | -0.152291000 | -1.279621000 | -1.362690000 |
|                |            | 13         | 2.110775000  | -1.259974000 | 0.000061000  |
|                |            | 21         | -2.237090000 | 0.000126000  | -0.000008000 |

| Isomer         | Spin state | Coordinate |              |              |              |
|----------------|------------|------------|--------------|--------------|--------------|
| <b>c.8.B.1</b> | doublet    | 13         | -1.577045000 | 1.776361000  | -0.124891000 |
|                |            | 13         | 2.520627000  | -0.313385000 | -1.179603000 |
|                |            | 13         | -0.434908000 | 0.124354000  | 1.715621000  |
|                |            | 13         | 0.267300000  | -1.775906000 | 0.053910000  |
|                |            | 13         | -0.073365000 | 0.069545000  | -1.696474000 |
|                |            | 13         | 1.026640000  | 1.713622000  | 0.077891000  |
|                |            | 13         | 2.131491000  | -0.319609000 | 1.340412000  |
|                |            | 21         | -2.389982000 | -0.789274000 | -0.115679000 |
| <b>n.8.B.1</b> | triplet    | 13         | 0.435104000  | 0.085251000  | 1.634500000  |
|                |            | 13         | -2.116313000 | -0.193365000 | 1.309880000  |
|                |            | 13         | 0.053659000  | 0.034169000  | -1.567817000 |
|                |            | 13         | -0.849880000 | 1.822948000  | 0.101094000  |
|                |            | 13         | 1.831707000  | 1.799600000  | -0.124206000 |
|                |            | 13         | -2.536112000 | -0.125620000 | -1.198428000 |
|                |            | 13         | -0.434466000 | -1.926254000 | 0.087466000  |
|                |            | 21         | 2.238663000  | -0.926547000 | -0.150113000 |
| <b>a.8.B.1</b> | quartet    | 13         | -1.744009000 | 0.696085000  | 0.000000000  |
|                |            | 13         | 0.064595000  | -0.308153000 | 1.651580000  |
|                |            | 13         | 0.064595000  | 2.343995000  | 1.315621000  |
|                |            | 13         | 0.064595000  | -0.308153000 | -1.651580000 |
|                |            | 13         | 0.064595000  | 2.343995000  | -1.315621000 |
|                |            | 13         | 1.572570000  | -2.048500000 | 0.000000000  |
|                |            | 13         | 1.827028000  | 0.693892000  | 0.000000000  |
|                |            | 21         | -1.184839000 | -2.112910000 | 0.000000000  |

| Isomer         | Spin state | Coordinate |              |              |              |
|----------------|------------|------------|--------------|--------------|--------------|
| <b>c.9.B.1</b> | singlet    | 13         | -0.878752000 | -1.854542000 | 0.112274000  |
|                |            | 13         | 0.648539000  | 0.000363000  | 1.700974000  |
|                |            | 13         | -0.879646000 | 1.854524000  | 0.111682000  |
|                |            | 13         | 3.164959000  | 0.000223000  | -0.770060000 |
|                |            | 13         | 1.817404000  | 1.914590000  | 0.199305000  |
|                |            | 13         | 1.817933000  | -1.914467000 | 0.199071000  |
|                |            | 13         | 0.318589000  | -0.000043000 | -1.368488000 |
|                |            | 13         | -1.996251000 | -0.000219000 | 1.606809000  |
|                |            | 21         | -2.484099000 | -0.000266000 | -1.109065000 |
| <b>n.9.B.1</b> | doublet    | 13         | 0.860719000  | -1.980085000 | 0.147442000  |
|                |            | 13         | -0.794956000 | 0.000000000  | 1.447648000  |
|                |            | 13         | -2.955807000 | 0.000001000  | -0.590814000 |
|                |            | 13         | 0.860722000  | 1.980084000  | 0.147442000  |
|                |            | 13         | -1.751955000 | 2.149330000  | 0.056515000  |
|                |            | 13         | 1.795306000  | 0.000000000  | 1.626866000  |
|                |            | 13         | -0.258141000 | 0.000001000  | -1.310859000 |
|                |            | 13         | -1.751958000 | -2.149329000 | 0.056516000  |
|                |            | 21         | 2.473759000  | -0.000002000 | -0.978564000 |
| <b>a.9.B.1</b> | singlet    | 13         | 2.880747000  | -0.000005000 | -0.548425000 |
|                |            | 13         | 1.709479000  | -2.253139000 | 0.010906000  |
|                |            | 13         | -0.860391000 | 2.080958000  | 0.155196000  |
|                |            | 13         | -1.710935000 | 0.000004000  | 1.614240000  |
|                |            | 13         | 0.832349000  | -0.000006000 | 1.366510000  |
|                |            | 13         | 0.245956000  | 0.000007000  | -1.234531000 |
|                |            | 13         | 1.709487000  | 2.253134000  | 0.010912000  |
|                |            | 13         | -0.860398000 | -2.080954000 | 0.155199000  |
|                |            | 21         | -2.442943000 | -0.000000000 | -0.947148000 |

| Isomer          | Spin state | Coordinate |              |              |              |
|-----------------|------------|------------|--------------|--------------|--------------|
| <b>c.10.B.1</b> | doublet    | 13         | -1.098304000 | 0.139547000  | 1.392458000  |
|                 |            | 13         | -2.381109000 | -1.710136000 | -0.591804000 |
|                 |            | 13         | -0.369053000 | -2.389343000 | 0.779176000  |
|                 |            | 13         | 1.435153000  | -0.461761000 | 1.477429000  |
|                 |            | 13         | 1.657655000  | -1.967974000 | -0.697065000 |
|                 |            | 13         | 0.973262000  | 2.046865000  | 0.882551000  |
|                 |            | 13         | -2.981639000 | 0.741730000  | -0.596773000 |
|                 |            | 13         | -0.133575000 | 0.047125000  | -1.061637000 |
|                 |            | 13         | -1.251940000 | 2.559518000  | -0.191737000 |
|                 |            | 21         | 2.568769000  | 0.615599000  | -0.862084000 |
| <b>n.10.B.1</b> | singlet    | 13         | -1.486739000 | -2.363155000 | -0.299243000 |
|                 |            | 13         | -3.090913000 | -0.437326000 | -0.573486000 |
|                 |            | 13         | -2.185763000 | 1.921577000  | -0.522583000 |
|                 |            | 13         | 0.703254000  | -2.152555000 | 0.944609000  |
|                 |            | 13         | -0.037017000 | 2.359172000  | 0.763697000  |
|                 |            | 13         | 2.093633000  | 1.830733000  | -0.646842000 |
|                 |            | 13         | -1.153408000 | -0.093820000 | 1.341888000  |
|                 |            | 13         | -0.114399000 | 0.070361000  | -1.104205000 |
|                 |            | 13         | 1.413165000  | 0.293406000  | 1.486584000  |
|                 |            | 21         | 2.388401000  | -0.884243000 | -0.860736000 |
| <b>a.10.B.1</b> | doublet    | 13         | -0.848753000 | 1.277821000  | 1.444027000  |
|                 |            | 13         | -2.676531000 | 0.005571000  | -0.220367000 |
|                 |            | 13         | -0.142476000 | 0.000445000  | -0.954037000 |
|                 |            | 13         | 2.577198000  | -0.004723000 | -1.266112000 |
|                 |            | 13         | 1.132353000  | -2.299125000 | -0.436713000 |
|                 |            | 13         | -0.853782000 | -1.274421000 | 1.443393000  |
|                 |            | 13         | -1.477113000 | 2.408172000  | -0.849602000 |
|                 |            | 13         | 1.143065000  | 2.293720000  | -0.436811000 |
|                 |            | 13         | -1.488125000 | -2.400955000 | -0.850648000 |
|                 |            | 21         | 1.630673000  | -0.004026000 | 1.316634000  |

| Isomer          | Spin state   | Coordinate      |              |              |              |              |              |
|-----------------|--------------|-----------------|--------------|--------------|--------------|--------------|--------------|
| <b>c.11.B.1</b> | singlet      | 13              | 2.919716000  | -1.249798000 | -0.600380000 |              |              |
|                 |              | 13              | 0.840021000  | -2.570985000 | 0.106079000  |              |              |
|                 |              | 13              | -0.895724000 | -1.261541000 | 1.529927000  |              |              |
|                 |              | 13              | -1.498392000 | -2.420235000 | -1.007101000 |              |              |
|                 |              | 13              | 0.069375000  | 0.000018000  | -0.951223000 |              |              |
|                 |              | 13              | 1.482035000  | -0.000088000 | 1.326801000  |              |              |
|                 |              | 13              | 2.919688000  | 1.250118000  | -0.599687000 |              |              |
|                 |              | 13              | 0.839672000  | 2.571207000  | 0.105821000  |              |              |
|                 |              | 13              | -1.498807000 | 2.420122000  | -1.007046000 |              |              |
|                 |              | 13              | -0.895745000 | 1.261457000  | 1.529854000  |              |              |
|                 |              | 21              | -2.650662000 | -0.000170000 | -0.268076000 |              |              |
|                 |              | <b>n.11.B.1</b> | doublet      | 13           | 2.828280000  | -1.254564000 | -0.647227000 |
|                 |              |                 |              | 13           | 0.887112000  | -2.592487000 | 0.284089000  |
| 13              | -0.981641000 |                 |              | -1.293217000 | 1.513004000  |              |              |
| 13              | -1.352698000 |                 |              | -2.414509000 | -1.048935000 |              |              |
| 13              | 0.110745000  |                 |              | -0.000015000 | -0.981231000 |              |              |
| 13              | 1.348615000  |                 |              | 0.000052000  | 1.371713000  |              |              |
| 13              | 2.827939000  |                 |              | 1.255119000  | -0.647031000 |              |              |
| 13              | 0.886552000  |                 |              | 2.592818000  | 0.283955000  |              |              |
| 13              | -1.353322000 |                 |              | 2.414350000  | -1.048776000 |              |              |
| 13              | -0.981874000 |                 |              | 1.292934000  | 1.512989000  |              |              |
| 21              | -2.612201000 | -0.000299000    | -0.366817000 |              |              |              |              |
| <b>a.11.B.1</b> | singlet      | 13              | 2.095560000  | -1.249520000 | -1.307456000 |              |              |
|                 |              | 13              | -0.147899000 | -1.474052000 | 2.658025000  |              |              |
|                 |              | 13              | 2.095560000  | -1.249520000 | 1.307456000  |              |              |
|                 |              | 13              | -0.147899000 | 1.163182000  | 2.345417000  |              |              |
|                 |              | 13              | -2.272710000 | -0.004273000 | 1.349580000  |              |              |
|                 |              | 13              | -0.147899000 | 1.163182000  | -2.345417000 |              |              |
|                 |              | 13              | -1.183101000 | 2.082697000  | -0.000000000 |              |              |
|                 |              | 13              | -2.272710000 | -0.004273000 | -1.349580000 |              |              |
|                 |              | 13              | -0.147899000 | -1.474052000 | -2.658025000 |              |              |
|                 |              | 13              | -0.199109000 | -1.028047000 | 0.000000000  |              |              |
| 21              | 1.441208000  | 1.284323000     | -0.000000000 |              |              |              |              |

| Isomer          | Spin state   | Coordinate      |              |              |              |
|-----------------|--------------|-----------------|--------------|--------------|--------------|
| <b>c.12.B.1</b> | doublet      | 13              | -1.096808000 | 2.261969000  | 1.369027000  |
|                 |              | 13              | -1.096808000 | -0.401511000 | 2.223820000  |
|                 |              | 13              | -2.429036000 | 0.229832000  | -0.000000000 |
|                 |              | 13              | -1.096808000 | -0.401511000 | -2.223820000 |
|                 |              | 13              | -1.096808000 | 2.261969000  | -1.369027000 |
|                 |              | 13              | 1.134104000  | 1.164261000  | -2.385918000 |
|                 |              | 13              | 1.380111000  | -1.459213000 | -1.739902000 |
|                 |              | 13              | 1.134104000  | 1.164261000  | 2.385918000  |
|                 |              | 13              | 1.380111000  | -1.459213000 | 1.739902000  |
|                 |              | 13              | 2.880275000  | -0.144606000 | 0.000000000  |
|                 |              | 13              | 0.250367000  | 0.343277000  | 0.000000000  |
|                 |              | 21              | -0.831260000 | -2.203509000 | -0.000000000 |
|                 |              | <b>n.12.B.1</b> | singlet      | 13           | -0.000324000 |
| 13              | -2.377861000 |                 |              | 0.022096000  | -1.688873000 |
| 13              | 1.390262000  |                 |              | 2.305184000  | -0.900095000 |
| 13              | 2.377702000  |                 |              | 0.023125000  | -1.688843000 |
| 13              | 2.209757000  |                 |              | 0.499847000  | 1.054028000  |
| 13              | 1.808651000  |                 |              | -1.933861000 | 0.110861000  |
| 13              | -1.807702000 |                 |              | -1.934731000 | 0.110636000  |
| 13              | -0.000090000 |                 |              | 0.042132000  | -0.413403000 |
| 13              | 0.000786000  |                 |              | -2.214311000 | -1.818031000 |
| 13              | -1.391427000 |                 |              | 2.304567000  | -0.899974000 |
| 13              | -2.210016000 |                 |              | 0.498773000  | 1.054097000  |
| 21              | 0.000162000  |                 |              | -0.923991000 | 2.198120000  |
| <b>a.12.B.1</b> | doublet      |                 |              | 13           | -1.519549000 |
|                 |              | 13              | -1.365266000 | -1.907170000 | -1.595898000 |
|                 |              | 13              | -0.131685000 | 2.403277000  | -1.472653000 |
|                 |              | 13              | 2.241420000  | 0.855087000  | -1.556826000 |
|                 |              | 13              | 1.334698000  | 1.928986000  | 0.861128000  |
|                 |              | 13              | 2.280685000  | -0.612482000 | 0.824254000  |
|                 |              | 13              | 0.124743000  | -2.387734000 | 0.724063000  |
|                 |              | 13              | -0.000832000 | 0.007794000  | -0.340494000 |
|                 |              | 13              | 1.554192000  | -1.760544000 | -1.598479000 |
|                 |              | 13              | -2.316186000 | 0.637012000  | -1.555543000 |
|                 |              | 13              | -2.211122000 | -0.831239000 | 0.823650000  |
|                 |              | 21              | 0.005510000  | -0.071850000 | 2.486352000  |

| Isomer          | Spin state   | Coordinate      |              |              |              |
|-----------------|--------------|-----------------|--------------|--------------|--------------|
| <b>c.13.B.1</b> | singlet      | 13              | 0.994376000  | -2.403644000 | 0.196579000  |
|                 |              | 13              | 0.993772000  | 1.829064000  | -1.572048000 |
|                 |              | 13              | 0.994166000  | -0.929695000 | -2.225285000 |
|                 |              | 13              | -1.320004000 | 0.544429000  | -2.299132000 |
|                 |              | 13              | -1.319589000 | -2.018441000 | -1.228573000 |
|                 |              | 13              | -2.634370000 | -0.000375000 | 0.000219000  |
|                 |              | 13              | -1.320220000 | 2.354797000  | -0.192704000 |
|                 |              | 13              | -1.319541000 | -1.792359000 | 1.539921000  |
|                 |              | 13              | -1.319969000 | 0.910756000  | 2.180214000  |
|                 |              | 13              | 0.993989000  | -0.555625000 | 2.346938000  |
|                 |              | 13              | 0.993632000  | 2.060512000  | 1.253670000  |
|                 |              | 13              | -0.034305000 | -0.000056000 | 0.000027000  |
|                 |              | 21              | 2.660706000  | 0.000394000  | 0.000108000  |
|                 |              | <b>n.13.B.1</b> | doublet      | 13           | 0.000000000  |
| 13              | 2.270762000  |                 |              | 0.737815000  | 1.021278000  |
| 13              | 2.243320000  |                 |              | -0.728899000 | -1.325134000 |
| 13              | 1.403408000  |                 |              | -1.931625000 | 1.021278000  |
| 13              | 1.386448000  |                 |              | 1.908282000  | -1.325134000 |
| 13              | 0.000000000  |                 |              | 0.000000000  | -2.778386000 |
| 13              | -1.386448000 |                 |              | 1.908282000  | -1.325134000 |
| 13              | -2.270762000 |                 |              | 0.737815000  | 1.021278000  |
| 13              | -2.243320000 |                 |              | -0.728899000 | -1.325134000 |
| 13              | -0.000000000 |                 |              | -2.358766000 | -1.325134000 |
| 13              | 0.000000000  |                 |              | 0.000000000  | -0.058254000 |
| 13              | -1.403408000 |                 |              | -1.931625000 | 1.021278000  |
| 21              | 0.000000000  |                 |              | 0.000000000  | 2.696522000  |
| <b>a.13.B.1</b> | singlet      |                 |              | 13           | -0.000000000 |
|                 |              | 13              | 2.256741000  | 0.733260000  | 1.054769000  |
|                 |              | 13              | 2.236173000  | -0.726577000 | -1.333656000 |
|                 |              | 13              | 1.394743000  | -1.919699000 | 1.054769000  |
|                 |              | 13              | 1.382031000  | 1.902203000  | -1.333656000 |
|                 |              | 13              | 0.000000000  | 0.000000000  | -2.976302000 |
|                 |              | 13              | -1.382031000 | 1.902203000  | -1.333656000 |
|                 |              | 13              | -2.256741000 | 0.733260000  | 1.054769000  |
|                 |              | 13              | -2.236173000 | -0.726577000 | -1.333656000 |
|                 |              | 13              | -0.000000000 | -2.351252000 | -1.333656000 |
|                 |              | 13              | 0.000000000  | 0.000000000  | -0.076045000 |
|                 |              | 13              | -1.394743000 | -1.919699000 | 1.054769000  |
|                 |              | 21              | 0.000000000  | 0.000000000  | 2.752769000  |

| Isomer          | Spin state | Coordinate |              |              |              |
|-----------------|------------|------------|--------------|--------------|--------------|
| <b>c.14.B.1</b> | doublet    | 13         | -1.159259000 | -0.861833000 | -2.243015000 |
|                 |            | 13         | 1.213883000  | 0.811727000  | -2.271107000 |
|                 |            | 13         | 1.002960000  | 2.375372000  | -0.000576000 |
|                 |            | 13         | -1.084531000 | 1.936879000  | -1.754291000 |
|                 |            | 13         | -1.084467000 | 1.937551000  | 1.753553000  |
|                 |            | 13         | -2.845520000 | 1.180661000  | -0.000215000 |
|                 |            | 13         | -1.159268000 | -0.860903000 | 2.243506000  |
|                 |            | 13         | -2.781834000 | -1.333052000 | 0.000247000  |
|                 |            | 13         | -0.117936000 | 0.016323000  | 0.000023000  |
|                 |            | 13         | -0.610701000 | -2.732136000 | 0.000542000  |
|                 |            | 13         | 1.355216000  | -1.732825000 | 1.467575000  |
|                 |            | 13         | 1.214060000  | 0.812879000  | 2.270681000  |
|                 |            | 13         | 1.355191000  | -1.733534000 | -1.466835000 |
|                 |            | 21         | 2.910889000  | 0.113218000  | -0.000055000 |
| <b>n.14.B.1</b> | singlet    | 13         | -1.731438000 | -1.894588000 | -0.000049000 |
|                 |            | 13         | 0.548886000  | -2.151768000 | -1.400843000 |
|                 |            | 13         | 1.346786000  | 0.251847000  | -2.368719000 |
|                 |            | 13         | 2.269209000  | 1.756317000  | 0.000045000  |
|                 |            | 13         | -1.397796000 | -0.139309000 | -2.089677000 |
|                 |            | 13         | -0.053650000 | 2.323917000  | 1.401030000  |
|                 |            | 13         | -2.206860000 | 1.475049000  | -0.000016000 |
|                 |            | 13         | -0.053617000 | 2.323957000  | -1.400977000 |
|                 |            | 13         | -3.964323000 | -0.448029000 | 0.000018000  |
|                 |            | 13         | 0.231524000  | 0.066069000  | -0.000002000 |
|                 |            | 13         | -1.397843000 | -0.139359000 | 2.089628000  |
|                 |            | 13         | 1.346741000  | 0.251785000  | 2.368742000  |
|                 |            | 13         | 0.548853000  | -2.151801000 | 1.400795000  |
|                 |            | 21         | 2.794089000  | -0.943482000 | 0.000016000  |
| <b>a.14.B.1</b> | doublet    | 13         | 1.792454000  | -1.056115000 | -1.404136000 |
|                 |            | 13         | -2.120823000 | 1.236890000  | 1.456566000  |
|                 |            | 13         | -0.828482000 | -1.145410000 | 2.236711000  |
|                 |            | 13         | 1.792542000  | -1.056891000 | 1.403468000  |
|                 |            | 13         | 0.536080000  | 1.281370000  | 2.245247000  |
|                 |            | 13         | 2.201783000  | 1.444021000  | 0.000184000  |
|                 |            | 13         | -0.256873000 | 2.721155000  | 0.000646000  |
|                 |            | 13         | 0.535766000  | 1.282473000  | -2.244722000 |
|                 |            | 13         | -2.121052000 | 1.237567000  | -1.455744000 |
|                 |            | 13         | 4.093352000  | -0.494430000 | -0.000096000 |
|                 |            | 13         | -0.238224000 | 0.077607000  | 0.000011000  |
|                 |            | 13         | -0.131790000 | -2.563223000 | -0.000645000 |
|                 |            | 13         | -0.828667000 | -1.144311000 | -2.237224000 |
|                 |            | 21         | -2.739946000 | -1.127103000 | -0.000165000 |

| Isomer          | Spin state   | Coordinate   |              |              |              |
|-----------------|--------------|--------------|--------------|--------------|--------------|
| <b>c.14.B.1</b> | singlet      | 13           | 0.263028000  | -1.410515000 | 2.291429000  |
|                 |              | 13           | 2.601649000  | -0.000026000 | 1.692009000  |
|                 |              | 13           | 1.760737000  | 2.322417000  | 0.125964000  |
|                 |              | 13           | 0.546099000  | -1.370732000 | -2.169289000 |
|                 |              | 13           | -1.720515000 | 0.000015000  | -1.553622000 |
|                 |              | 13           | 0.546106000  | 1.370785000  | -2.169258000 |
|                 |              | 13           | -1.021706000 | 2.234308000  | -0.025888000 |
|                 |              | 13           | 0.263032000  | 1.410475000  | 2.291455000  |
|                 |              | 13           | -1.901309000 | -0.000011000 | 1.442400000  |
|                 |              | 13           | -3.678038000 | -1.364109000 | -0.190904000 |
|                 |              | 13           | -3.678035000 | 1.364111000  | -0.190872000 |
|                 |              | 13           | 0.474326000  | -0.000001000 | 0.072129000  |
|                 |              | 13           | 1.760725000  | -2.322423000 | 0.125929000  |
|                 |              | 13           | -1.021707000 | -2.234303000 | -0.025931000 |
| 21              | 2.974899000  | 0.000006000  | -1.062009000 |              |              |
| <b>n.14.B.1</b> | doublet      | 13           | -0.358865000 | 1.313354000  | 2.365849000  |
|                 |              | 13           | -2.559566000 | -0.247774000 | 1.688654000  |
|                 |              | 13           | -1.496093000 | -2.402216000 | 0.077770000  |
|                 |              | 13           | -0.681289000 | 1.458135000  | -2.105178000 |
|                 |              | 13           | 1.649795000  | 0.169070000  | -1.641932000 |
|                 |              | 13           | -0.535574000 | -1.294988000 | -2.242671000 |
|                 |              | 13           | 1.205538000  | -2.129506000 | -0.151718000 |
|                 |              | 13           | -0.146070000 | -1.491271000 | 2.261534000  |
|                 |              | 13           | 1.897354000  | 0.044245000  | 1.478241000  |
|                 |              | 13           | 3.506456000  | 1.417648000  | -0.162647000 |
|                 |              | 13           | 3.802811000  | -1.208830000 | -0.252934000 |
|                 |              | 13           | -0.454776000 | -0.003146000 | 0.071452000  |
|                 |              | 13           | -1.897571000 | 2.218584000  | 0.257174000  |
|                 |              | 13           | 0.866205000  | 2.285951000  | 0.062584000  |
| 21              | -2.970410000 | -0.080015000 | -1.056207000 |              |              |
| <b>a.14.B.1</b> | singlet      | 13           | 0.263028000  | -1.410515000 | 2.291429000  |
|                 |              | 13           | 2.601649000  | -0.000026000 | 1.692009000  |
|                 |              | 13           | 1.760737000  | 2.322417000  | 0.125964000  |
|                 |              | 13           | 0.546099000  | -1.370732000 | -2.169289000 |
|                 |              | 13           | -1.720515000 | 0.000015000  | -1.553622000 |
|                 |              | 13           | 0.546106000  | 1.370785000  | -2.169258000 |
|                 |              | 13           | -1.021706000 | 2.234308000  | -0.025888000 |
|                 |              | 13           | 0.263032000  | 1.410475000  | 2.291455000  |
|                 |              | 13           | -1.901309000 | -0.000011000 | 1.442400000  |
|                 |              | 13           | -3.678038000 | -1.364109000 | -0.190904000 |
|                 |              | 13           | -3.678035000 | 1.364111000  | -0.190872000 |
|                 |              | 13           | 0.474326000  | -0.000001000 | 0.072129000  |
|                 |              | 13           | 1.760725000  | -2.322423000 | 0.125929000  |
|                 |              | 13           | -1.021707000 | -2.234303000 | -0.025931000 |
| 21              | 2.974899000  | 0.000006000  | -1.062009000 |              |              |

**Coordinates of the lowest-lying Sc<sub>2</sub>Al<sub>n-2</sub><sup>+0/-</sup> clusters with n = 3 - 15**

| <b>Isomer</b>  | <b>Spin state</b> | <b>Coordinate</b> |              |              |              |
|----------------|-------------------|-------------------|--------------|--------------|--------------|
| <b>c.3.C.1</b> | triplet           | 21                | 1.013494000  | 1.122408000  | -0.000000000 |
|                |                   | 21                | 0.000000000  | -1.512215000 | 0.000000000  |
|                |                   | 13                | -1.637182000 | 0.629687000  | -0.000000000 |
| <b>n.3.C.1</b> | doublet           | 13                | 1.575420000  | 0.562361000  | 0.000000000  |
|                |                   | 21                | -0.975260000 | 1.191949000  | 0.000000000  |
|                |                   | 21                | -0.000000000 | -1.540077000 | -0.000000000 |
| <b>a.3.C.1</b> | singlet           | 13                | 1.602140000  | 0.614544000  | 0.000000000  |
|                |                   | 21                | -0.000000000 | -1.483045000 | 0.000000000  |
|                |                   | 21                | -0.991801000 | 1.102613000  | 0.000000000  |

| <b>Isomer</b>  | <b>Spin state</b> | <b>Coordinate</b> |              |              |              |
|----------------|-------------------|-------------------|--------------|--------------|--------------|
| <b>c.4.C.1</b> | doublet           | 13                | 0.000098000  | -1.183107000 | 1.254010000  |
|                |                   | 13                | -0.000234000 | -1.187057000 | -1.251432000 |
|                |                   | 21                | 1.503159000  | 0.733568000  | -0.000884000 |
|                |                   | 21                | -1.503074000 | 0.733676000  | -0.000712000 |
| <b>n.4.C.1</b> | triplet           | 13                | -0.000023000 | 1.225966000  | -1.286822000 |
|                |                   | 13                | 0.000014000  | 1.225921000  | 1.286854000  |
|                |                   | 21                | 1.398206000  | -0.758913000 | -0.000028000 |
|                |                   | 21                | -1.398199000 | -0.758922000 | 0.000008000  |
| <b>a.4.C.1</b> | quartet           | 13                | -1.321457000 | -0.000004000 | 1.289077000  |
|                |                   | 13                | -1.321466000 | -0.000002000 | -1.289066000 |
|                |                   | 21                | 0.818045000  | 1.308554000  | -0.000006000 |
|                |                   | 21                | 0.818051000  | -1.308550000 | -0.000001000 |

| <b>Isomer</b>  | <b>Spin state</b> | <b>Coordinate</b> |              |              |              |
|----------------|-------------------|-------------------|--------------|--------------|--------------|
| <b>c.5.C.1</b> | triplet           | 13                | -0.251208000 | 0.379069000  | 1.911027000  |
|                |                   | 13                | -1.859660000 | 0.737199000  | 0.000000000  |
|                |                   | 13                | -0.251208000 | 0.379069000  | -1.911027000 |
|                |                   | 21                | -0.251208000 | -1.602716000 | -0.000000000 |
|                |                   | 21                | 1.713446000  | 0.677032000  | -0.000000000 |
| <b>n.5.C.1</b> | quartet           | 13                | 2.167390000  | -0.000023000 | 0.245082000  |
|                |                   | 13                | -2.167394000 | -0.000021000 | 0.245053000  |
|                |                   | 13                | -0.000012000 | -0.000157000 | 1.699436000  |
|                |                   | 21                | 0.000006000  | 1.465883000  | -0.677590000 |
|                |                   | 21                | 0.000004000  | -1.465758000 | -0.677858000 |
| <b>a.5.C.1</b> | singlet           | 13                | 0.000003000  | -0.226757000 | 2.289566000  |
|                |                   | 13                | 0.000003000  | -1.752900000 | -0.000000000 |
|                |                   | 13                | 0.000003000  | -0.226757000 | -2.289566000 |
|                |                   | 21                | 1.337723000  | 0.682947000  | 0.000000000  |
|                |                   | 21                | -1.337729000 | 0.682928000  | -0.000000000 |

| Isomer         | Spin state | Coordinate |             |             |             |
|----------------|------------|------------|-------------|-------------|-------------|
| <b>c.6.C.1</b> | doublet    | 13         | -0.00000000 | -1.86641700 | -0.00000000 |
|                |            | 13         | -1.86641500 | 0.00000300  | 0.00000000  |
|                |            | 13         | 0.00000000  | 1.86641700  | -0.00000000 |
|                |            | 13         | 1.86641500  | -0.00000300 | 0.00000000  |
|                |            | 21         | -0.00000000 | 0.00000000  | 2.09018300  |
|                |            | 21         | -0.00000000 | 0.00000000  | -2.09018300 |
| <b>n.6.C.1</b> | singlet    | 13         | 0.00000000  | 1.80953900  | -0.00000000 |
|                |            | 13         | -0.00000000 | -1.80953900 | -0.00000000 |
|                |            | 13         | -1.80953900 | 0.00000000  | -0.00000000 |
|                |            | 13         | 1.80953900  | -0.00000000 | -0.00000000 |
|                |            | 21         | 0.00000000  | 0.00000000  | 2.13584300  |
|                |            | 21         | 0.00000000  | 0.00000000  | -2.13584300 |
| <b>a.6.C.1</b> | doublet    | 13         | 0.00000000  | 1.81251500  | -0.00000000 |
|                |            | 13         | -0.00000000 | -1.81251500 | -0.00000000 |
|                |            | 13         | -1.81251500 | 0.00000000  | -0.00000000 |
|                |            | 13         | 1.81251500  | -0.00000000 | -0.00000000 |
|                |            | 21         | 0.00000000  | 0.00000000  | 2.19830500  |
|                |            | 21         | 0.00000000  | 0.00000000  | -2.19830500 |
| <b>c.7.C.1</b> | singlet    | 13         | 1.16829800  | 1.27740200  | 1.30227000  |
|                |            | 13         | -1.10060500 | 1.66632300  | 0.00009300  |
|                |            | 13         | 1.16848200  | 1.27769400  | -1.30190500 |
|                |            | 13         | -0.23403100 | -0.89819100 | 1.32028700  |
|                |            | 13         | -0.23403000 | -0.89770500 | -1.32051300 |
|                |            | 21         | -2.69238700 | -0.47985600 | -0.00004800 |
|                | doublet    | 21         | 2.21688800  | -1.02165900 | -0.00009700 |
|                |            | 13         | 1.92229400  | 0.46377100  | 0.00000000  |
|                |            | 13         | -0.07491700 | -0.01330700 | 1.64283600  |
|                |            | 13         | -2.19785700 | 0.80819500  | 0.00000000  |
|                |            | 13         | -0.07491700 | -0.01330700 | -1.64283600 |
|                |            | 13         | -1.41954800 | -1.63765900 | 0.00000000  |
| <b>a.7.C.1</b> | triplet    | 21         | 1.21702600  | -2.14256800 | 0.00000000  |
|                |            | 21         | -0.07491700 | 2.38542400  | 0.00000000  |
|                |            | 13         | 0.00000000  | 1.30879800  | -1.93010400 |
|                |            | 13         | -0.00000000 | -1.30879800 | -1.93010400 |
|                |            | 13         | -1.56020400 | 0.00000000  | -0.08601600 |
|                |            | 13         | 1.56020400  | -0.00000000 | -0.08601600 |
|                |            | 13         | 0.00000000  | -0.00000000 | 2.14064900  |
|                |            | 21         | 0.00000000  | -2.28499000 | 0.58549200  |
|                |            | 21         | 0.00000000  | 2.28499000  | 0.58549200  |

| Isomer         | Spin state | Coordinate |              |              |              |
|----------------|------------|------------|--------------|--------------|--------------|
| <b>c.8.C.1</b> | doublet    | 13         | -0.214832000 | -1.092968000 | -1.268158000 |
|                |            | 13         | -0.792159000 | 1.332280000  | 1.106320000  |
|                |            | 13         | 1.847105000  | 1.082878000  | 1.332360000  |
|                |            | 13         | 0.214643000  | -1.094642000 | 1.266953000  |
|                |            | 13         | -1.846947000 | 1.084473000  | -1.331097000 |
|                |            | 13         | 0.792395000  | 1.333561000  | -1.104838000 |
|                |            | 21         | 2.510072000  | -0.818694000 | -0.458203000 |
|                |            | 21         | -2.510199000 | -0.819047000 | 0.457250000  |
| <b>n.8.C.1</b> | triplet    | 13         | 0.311665000  | -1.104720000 | -1.271912000 |
|                |            | 13         | -0.722750000 | 1.303619000  | -1.122556000 |
|                |            | 13         | -1.943763000 | 1.124339000  | 1.278223000  |
|                |            | 13         | -0.311662000 | -1.104866000 | 1.271797000  |
|                |            | 13         | 0.722741000  | 1.303495000  | 1.122687000  |
|                |            | 13         | 1.943767000  | 1.124474000  | -1.278105000 |
|                |            | 21         | 2.458133000  | -0.819132000 | 0.521127000  |
|                |            | 21         | -2.458131000 | -0.819080000 | -0.521210000 |
| <b>a.8.C.1</b> | doublet    | 13         | 1.443403000  | -1.315349000 | 0.992281000  |
|                |            | 13         | -0.873074000 | -2.271467000 | 0.195737000  |
|                |            | 13         | 0.086073000  | -0.221789000 | -1.266351000 |
|                |            | 13         | 2.772616000  | -0.583664000 | -1.193422000 |
|                |            | 13         | -0.708459000 | 0.166453000  | 1.558676000  |
|                |            | 13         | -1.090839000 | 2.208333000  | -0.281100000 |
|                |            | 21         | -2.527802000 | -0.155305000 | -0.453264000 |
|                |            | 21         | 1.518928000  | 1.404223000  | 0.449660000  |

| Isomer         | Spin state | Coordinate |              |              |              |
|----------------|------------|------------|--------------|--------------|--------------|
| <b>c.9.C.1</b> | singlet    | 13         | 0.000000000  | 0.110609000  | -1.060236000 |
|                |            | 13         | 1.280657000  | 0.168010000  | 1.483974000  |
|                |            | 13         | -0.000017000 | 2.456420000  | 0.233761000  |
|                |            | 13         | 2.361364000  | 1.575924000  | -0.529750000 |
|                |            | 13         | -1.280642000 | 0.168020000  | 1.483970000  |
|                |            | 13         | -2.361387000 | 1.575900000  | -0.529755000 |
|                |            | 13         | 0.000010000  | -2.092998000 | 0.706962000  |
|                |            | 21         | -2.349997000 | -1.226306000 | -0.553709000 |
|                |            | 21         | 2.350006000  | -1.226289000 | -0.553721000 |
| <b>n.9.C.1</b> | doublet    | 13         | -0.000012000 | 0.089613000  | -1.080788000 |
|                |            | 13         | 1.269931000  | 0.223574000  | 1.505031000  |
|                |            | 13         | -0.001521000 | 2.351360000  | 0.367563000  |
|                |            | 13         | 2.344551000  | 1.558265000  | -0.643440000 |
|                |            | 13         | -1.269198000 | 0.221649000  | 1.505331000  |
|                |            | 13         | -2.345196000 | 1.557811000  | -0.643529000 |
|                |            | 13         | 0.000687000  | -2.071783000 | 0.773346000  |
|                |            | 21         | -2.319198000 | -1.217014000 | -0.551919000 |
|                |            | 21         | 2.319667000  | -1.216146000 | -0.552162000 |
| <b>a.9.C.1</b> | singlet    | 13         | 0.000000000  | 1.308798000  | -1.930104000 |
|                |            | 13         | -0.000000000 | -1.308798000 | -1.930104000 |
|                |            | 13         | -1.560204000 | 0.000000000  | -0.086016000 |
|                |            | 13         | 1.560204000  | -0.000000000 | -0.086016000 |
|                |            | 13         | 0.000000000  | -0.000000000 | 2.140649000  |
|                |            | 21         | 0.000000000  | -2.284990000 | 0.585492000  |
|                |            | 21         | 0.000000000  | 2.284990000  | 0.585492000  |

| Isomer   | Spin state | Coordinate |              |              |              |
|----------|------------|------------|--------------|--------------|--------------|
| c.10.C.1 | doublet    | 13         | 1.091338000  | 2.797821000  | 0.727694000  |
|          |            | 13         | -2.155472000 | 0.570572000  | -1.106876000 |
|          |            | 13         | 0.487828000  | -1.697148000 | 1.148994000  |
|          |            | 13         | -0.560628000 | -1.611914000 | -1.273309000 |
|          |            | 13         | 0.646710000  | 0.700562000  | -1.147306000 |
|          |            | 13         | 2.166277000  | 0.485383000  | 1.128721000  |
|          |            | 13         | -1.058060000 | 2.858004000  | -0.689290000 |
|          |            | 13         | -0.678893000 | 0.676069000  | 1.191494000  |
|          |            | 21         | -2.342338000 | -1.501502000 | 0.802946000  |
|          |            | 21         | 2.380038000  | -1.457143000 | -0.790640000 |
| n.10.C.1 | singlet    | 13         | -2.012273000 | -0.742848000 | 1.148068000  |
|          |            | 13         | -1.691632000 | -1.861655000 | -1.138843000 |
|          |            | 13         | -2.012267000 | 0.742831000  | -1.148075000 |
|          |            | 13         | -1.691660000 | 1.861642000  | 1.138839000  |
|          |            | 13         | 2.580440000  | -1.228231000 | 0.208170000  |
|          |            | 13         | 0.142086000  | -2.419955000 | 0.590316000  |
|          |            | 13         | 2.580428000  | 1.228256000  | -0.208160000 |
|          |            | 13         | 0.142060000  | 2.419952000  | -0.590315000 |
|          |            | 21         | 0.607545000  | -0.163200000 | -1.581446000 |
|          |            | 21         | 0.607533000  | 0.163205000  | 1.581447000  |
| a.10.C.1 | doublet    | 13         | 0.213785000  | 2.396863000  | -0.714602000 |
|          |            | 13         | -1.989476000 | 0.673331000  | -1.196674000 |
|          |            | 13         | 2.512116000  | 1.263153000  | -0.199873000 |
|          |            | 13         | -1.989429000 | -0.672645000 | 1.197139000  |
|          |            | 13         | -1.704257000 | 1.966946000  | 1.012499000  |
|          |            | 13         | -1.705596000 | -1.966089000 | -1.012397000 |
|          |            | 13         | 2.511683000  | -1.264068000 | 0.199590000  |
|          |            | 13         | 0.212903000  | -2.396921000 | 0.714150000  |
|          |            | 21         | 0.600159000  | 0.304063000  | 1.585461000  |
|          |            | 21         | 0.599723000  | -0.304416000 | -1.585357000 |

| Isomer   | Spin state   | Coordinate  |              |              |              |              |              |
|----------|--------------|-------------|--------------|--------------|--------------|--------------|--------------|
| c.11.C.1 | singlet      | 13          | 1.320222000  | -1.227333000 | -1.479152000 |              |              |
|          |              | 13          | 1.882896000  | 1.493656000  | -1.035709000 |              |              |
|          |              | 13          | 0.767768000  | -1.819070000 | 1.084387000  |              |              |
|          |              | 13          | 0.724255000  | 0.863616000  | 1.306139000  |              |              |
|          |              | 13          | -0.638523000 | 0.414424000  | -1.050162000 |              |              |
|          |              | 13          | -3.247188000 | 0.040449000  | -0.414676000 |              |              |
|          |              | 13          | -0.001020000 | 3.166161000  | -0.484312000 |              |              |
|          |              | 13          | -1.907445000 | 2.020751000  | 0.781739000  |              |              |
|          |              | 13          | -1.519952000 | -0.563841000 | 1.504318000  |              |              |
|          |              | 21          | 3.117748000  | -0.481903000 | 0.478463000  |              |              |
|          |              | 21          | -1.496470000 | -2.234981000 | -0.610055000 |              |              |
|          |              | n.11.C.1    | doublet      | 13           | 0.003019000  | -0.045025000 | -0.811754000 |
|          |              |             |              | 13           | 2.281420000  | -1.332370000 | -1.603278000 |
| 13       | 0.142446000  |             |              | -2.679150000 | -0.358986000 |              |              |
| 13       | -0.515322000 |             |              | -1.142215000 | 1.714840000  |              |              |
| 13       | 2.008053000  |             |              | -1.251017000 | 1.014000000  |              |              |
| 13       | 2.371580000  |             |              | 1.253308000  | -0.993487000 |              |              |
| 13       | -0.008549000 |             |              | 2.636603000  | -0.681580000 |              |              |
| 13       | -2.199663000 |             |              | 1.375264000  | -1.458758000 |              |              |
| 13       | -1.789196000 |             |              | 1.044764000  | 1.173400000  |              |              |
| 21       | -2.476507000 |             |              | -1.251368000 | -0.294509000 |              |              |
| 21       | 1.056543000  | 1.337933000 | 1.536074000  |              |              |              |              |
| a.11.C.1 | singlet      | 13          | -2.915775000 | -0.620414000 | 0.738691000  |              |              |
|          |              | 13          | 1.745017000  | -1.171243000 | 1.516861000  |              |              |
|          |              | 13          | 0.794509000  | -2.080235000 | -1.027292000 |              |              |
|          |              | 13          | -1.745017000 | -1.171243000 | -1.516861000 |              |              |
|          |              | 13          | -2.059653000 | 1.442119000  | -0.729173000 |              |              |
|          |              | 13          | 0.000000000  | 2.871724000  | -0.000000000 |              |              |
|          |              | 13          | 2.059653000  | 1.442119000  | 0.729173000  |              |              |
|          |              | 13          | 2.915775000  | -0.620414000 | -0.738691000 |              |              |
|          |              | 13          | -0.794509000 | -2.080235000 | 1.027292000  |              |              |
|          |              | 21          | 0.450172000  | 0.615278000  | -1.620931000 |              |              |
| 21       | -0.450172000 | 0.615278000 | 1.620931000  |              |              |              |              |

| Isomer          | Spin state   | Coordinate      |              |              |              |
|-----------------|--------------|-----------------|--------------|--------------|--------------|
| <b>c.12.C.1</b> | doublet      | 13              | 0.939927000  | -2.260832000 | 0.903006000  |
|                 |              | 13              | -1.562157000 | -1.352061000 | 1.424453000  |
|                 |              | 13              | -1.562351000 | 1.351329000  | 1.424439000  |
|                 |              | 13              | -1.077769000 | 2.382920000  | -0.973129000 |
|                 |              | 13              | 1.478882000  | 1.897884000  | -1.676494000 |
|                 |              | 13              | -0.033168000 | -0.000792000 | -0.517560000 |
|                 |              | 13              | -1.075624000 | -2.384479000 | -0.972691000 |
|                 |              | 13              | 0.623766000  | 0.000111000  | 2.161645000  |
|                 |              | 13              | 0.937960000  | 2.261622000  | 0.902874000  |
|                 |              | 13              | 1.481133000  | -1.896871000 | -1.676507000 |
|                 |              | 21              | 2.694888000  | 0.001377000  | 0.165826000  |
|                 |              | 21              | -2.788115000 | -0.000653000 | -0.784895000 |
|                 |              | <b>n.12.C.1</b> | singlet      | 13           | -0.628743000 |
| 13              | 0.653777000  |                 |              | 2.202238000  | 0.887176000  |
| 13              | 0.654653000  |                 |              | -2.201888000 | 0.887441000  |
| 13              | -0.154347000 |                 |              | -0.000112000 | -0.441361000 |
| 13              | 1.804557000  |                 |              | -1.427097000 | -1.633016000 |
| 13              | -2.825537000 |                 |              | -0.000594000 | -1.188362000 |
| 13              | -1.944623000 |                 |              | 1.761018000  | 0.614988000  |
| 13              | 1.803853000  |                 |              | 1.427799000  | -1.633118000 |
| 13              | -0.627532000 |                 |              | -2.381992000 | -1.604241000 |
| 13              | -1.943886000 |                 |              | -1.761840000 | 0.614990000  |
| 21              | 2.366157000  |                 |              | 0.000545000  | 0.816303000  |
| 21              | -0.380360000 |                 |              | -0.000016000 | 2.340667000  |
| <b>a.12.C.1</b> | doublet      |                 |              | 13           | 2.647660000  |
|                 |              | 13              | 1.016402000  | -1.413679000 | -2.276559000 |
|                 |              | 13              | 1.142789000  | 2.267758000  | 0.398459000  |
|                 |              | 13              | 1.031961000  | 1.399200000  | -2.279564000 |
|                 |              | 13              | -0.055522000 | 0.000628000  | -0.289332000 |
|                 |              | 13              | -1.122545000 | -1.358577000 | 1.680022000  |
|                 |              | 13              | -1.126761000 | 1.368001000  | 1.671953000  |
|                 |              | 13              | -1.235011000 | 2.315578000  | -0.939599000 |
|                 |              | 13              | -1.239482000 | -2.319260000 | -0.923359000 |
|                 |              | 13              | 1.141827000  | -2.265679000 | 0.407693000  |
|                 |              | 21              | -2.822752000 | 0.001741000  | -0.286287000 |
|                 |              | 21              | 1.460032000  | 0.005589000  | 2.130798000  |

| Isomer          | Spin state  | Coordinate   |              |              |              |
|-----------------|-------------|--------------|--------------|--------------|--------------|
| <b>c.13.C.1</b> | singlet     | 13           | 2.362361000  | -1.158755000 | 0.000000000  |
|                 |             | 13           | 0.729283000  | -1.158599000 | 2.246769000  |
|                 |             | 13           | -1.911425000 | -1.157827000 | 1.388199000  |
|                 |             | 13           | -1.911425000 | -1.157827000 | -1.388199000 |
|                 |             | 13           | -0.729607000 | 1.158430000  | -2.246491000 |
|                 |             | 13           | 0.729283000  | -1.158599000 | -2.246769000 |
|                 |             | 13           | -0.000165000 | -0.000025000 | -0.000000000 |
|                 |             | 13           | 1.911155000  | 1.157972000  | 1.388717000  |
|                 |             | 13           | -0.729607000 | 1.158430000  | 2.246491000  |
|                 |             | 13           | 1.911155000  | 1.157972000  | -1.388717000 |
|                 |             | 13           | -2.361906000 | 1.158976000  | -0.000000000 |
|                 |             | 21           | -0.000018000 | -2.875132000 | 0.000000000  |
| 21              | 0.000575000 | 2.875040000  | -0.000000000 |              |              |
| <b>n.13.C.1</b> | doublet     | 13           | 1.232213000  | 1.217623000  | 1.989809000  |
|                 |             | 13           | -1.166767000 | -0.027729000 | 2.360399000  |
|                 |             | 13           | 1.064605000  | -2.256801000 | -0.829910000 |
|                 |             | 13           | -1.270887000 | -2.227313000 | 0.636540000  |
|                 |             | 13           | 1.105338000  | -1.547839000 | 1.816861000  |
|                 |             | 13           | -1.232146000 | -1.218088000 | -1.989324000 |
|                 |             | 13           | 1.166636000  | 0.028488000  | -2.360226000 |
|                 |             | 13           | -1.064591000 | 2.256863000  | 0.829449000  |
|                 |             | 13           | -0.000005000 | 0.000004000  | 0.000016000  |
|                 |             | 13           | -1.105365000 | 1.547660000  | -1.817028000 |
|                 |             | 13           | 1.270949000  | 2.227541000  | -0.635958000 |
|                 |             | 21           | -2.874050000 | 0.053908000  | 0.002862000  |
| 21              | 2.874063000 | -0.054160000 | -0.003251000 |              |              |
| <b>a.13.C.1</b> | singlet     | 13           | -0.000000000 | 2.310444000  | 1.615055000  |
|                 |             | 13           | -2.264010000 | 1.366638000  | 0.053838000  |
|                 |             | 13           | -2.264010000 | -1.366638000 | 0.053838000  |
|                 |             | 13           | 1.398764000  | -0.000000000 | 2.360613000  |
|                 |             | 13           | -0.000000000 | -2.310444000 | 1.615055000  |
|                 |             | 13           | -1.398764000 | 0.000000000  | 2.360613000  |
|                 |             | 13           | 2.264010000  | -1.366638000 | 0.053838000  |
|                 |             | 13           | 2.264010000  | 1.366638000  | 0.053838000  |
|                 |             | 13           | -1.353403000 | 0.000000000  | -2.141940000 |
|                 |             | 13           | -0.000000000 | -0.000000000 | 0.080084000  |
|                 |             | 13           | 1.353403000  | -0.000000000 | -2.141940000 |
|                 |             | 21           | 0.000000000  | -2.536568000 | -1.226609000 |
| 21              | 0.000000000 | 2.536568000  | -1.226609000 |              |              |

| Isomer          | Spin state | Coordinate |              |              |              |
|-----------------|------------|------------|--------------|--------------|--------------|
| <b>c.14.C.1</b> | doublet    | 13         | -2.208494000 | -0.620556000 | 1.290436000  |
|                 |            | 13         | 0.367996000  | -1.513411000 | 2.193656000  |
|                 |            | 13         | -0.609401000 | 0.966455000  | 2.526372000  |
|                 |            | 13         | 1.013675000  | 2.509052000  | 1.263839000  |
|                 |            | 13         | 0.367996000  | -1.513411000 | -2.193656000 |
|                 |            | 13         | -0.609401000 | 0.966455000  | -2.526372000 |
|                 |            | 13         | -2.208494000 | -0.620556000 | -1.290436000 |
|                 |            | 13         | 2.348456000  | 0.229270000  | -1.445159000 |
|                 |            | 13         | 2.348456000  | 0.229270000  | 1.445159000  |
|                 |            | 13         | 0.076979000  | 0.051689000  | 0.000000000  |
|                 |            | 13         | 2.046454000  | -2.063723000 | 0.000000000  |
|                 |            | 13         | 1.013675000  | 2.509052000  | -1.263839000 |
|                 |            | 21         | -0.754019000 | -2.845798000 | 0.000000000  |
|                 |            | 21         | -1.689916000 | 2.146530000  | 0.000000000  |
| <b>n.14.C.1</b> | singlet    | 13         | 0.969098000  | -0.637558000 | 2.441914000  |
|                 |            | 13         | 0.195296000  | 1.907398000  | 1.673993000  |
|                 |            | 13         | -1.595991000 | -0.141474000 | 1.822940000  |
|                 |            | 13         | -3.977110000 | -0.334100000 | 0.488755000  |
|                 |            | 13         | 2.179523000  | 0.125971000  | -1.860798000 |
|                 |            | 13         | 0.465835000  | -2.082748000 | -1.788192000 |
|                 |            | 13         | 2.259325000  | -1.883527000 | 0.219698000  |
|                 |            | 13         | -0.431407000 | 0.487955000  | -2.536796000 |
|                 |            | 13         | 0.287020000  | -0.053688000 | -0.046135000 |
|                 |            | 13         | -1.973244000 | -1.241010000 | -0.963402000 |
|                 |            | 13         | -0.373240000 | -2.510053000 | 0.863289000  |
|                 |            | 13         | 0.779230000  | 2.336279000  | -0.944403000 |
|                 |            | 21         | 2.796555000  | 0.881402000  | 0.756332000  |
|                 |            | 21         | -2.044000000 | 1.611228000  | -0.366866000 |
| <b>a.14.C.1</b> | doublet    | 13         | 0.979086000  | 0.909985000  | -2.349837000 |
|                 |            | 13         | 0.065649000  | -1.663818000 | -1.911128000 |
|                 |            | 13         | -1.612570000 | 0.514359000  | -1.754872000 |
|                 |            | 13         | -3.964572000 | 0.469500000  | -0.486870000 |
|                 |            | 13         | 2.168365000  | -0.501225000 | 1.838473000  |
|                 |            | 13         | 0.560498000  | 1.777355000  | 2.072043000  |
|                 |            | 13         | 2.411617000  | 1.798674000  | 0.048163000  |
|                 |            | 13         | -0.488705000 | -0.826037000 | 2.426285000  |
|                 |            | 13         | 0.296063000  | 0.046652000  | 0.058774000  |
|                 |            | 13         | -1.944610000 | 1.187436000  | 1.093633000  |
|                 |            | 13         | -0.202176000 | 2.634644000  | -0.478575000 |
|                 |            | 13         | 0.711304000  | -2.468672000 | 0.598060000  |
|                 |            | 21         | 2.768829000  | -0.813625000 | -0.920069000 |
|                 |            | 21         | -2.137368000 | -1.587570000 | 0.205597000  |

| Isomer          | Spin state   | Coordinate   |              |              |              |
|-----------------|--------------|--------------|--------------|--------------|--------------|
| <b>c.15.C.1</b> | singlet      | 13           | 0.601838000  | -1.353603000 | -2.203560000 |
|                 |              | 13           | 0.870858000  | 1.395450000  | -2.149103000 |
|                 |              | 13           | 2.114931000  | 2.182701000  | 0.318569000  |
|                 |              | 13           | 0.503641000  | 1.356596000  | 2.381900000  |
|                 |              | 13           | -3.224219000 | 1.907567000  | -0.136053000 |
|                 |              | 13           | 0.476517000  | -0.007297000 | 0.064270000  |
|                 |              | 13           | -1.829809000 | 0.219678000  | 1.435815000  |
|                 |              | 13           | -0.603804000 | 2.423157000  | 0.046659000  |
|                 |              | 13           | 2.506720000  | -0.359086000 | 1.698308000  |
|                 |              | 13           | 0.075424000  | -1.407441000 | 2.312581000  |
|                 |              | 13           | -1.502791000 | 0.253292000  | -1.683446000 |
|                 |              | 13           | 1.383640000  | -2.420157000 | 0.191196000  |
|                 |              | 13           | -3.866416000 | -0.557283000 | -0.355188000 |
|                 |              | 21           | 3.030911000  | -0.069134000 | -1.088875000 |
| 21              | -1.487334000 | -2.180220000 | -0.100901000 |              |              |
| <b>n.15.C.1</b> | doublet      | 13           | 0.583478000  | -1.349433000 | -2.181693000 |
|                 |              | 13           | 0.756304000  | 1.390339000  | -2.159934000 |
|                 |              | 13           | 1.979824000  | 2.284840000  | 0.250184000  |
|                 |              | 13           | 0.418696000  | 1.392867000  | 2.339886000  |
|                 |              | 13           | -3.355294000 | 1.863261000  | -0.136519000 |
|                 |              | 13           | 0.486333000  | -0.009320000 | 0.065804000  |
|                 |              | 13           | -1.828364000 | 0.145791000  | 1.392766000  |
|                 |              | 13           | -0.757725000 | 2.410202000  | 0.024644000  |
|                 |              | 13           | 2.563739000  | -0.187529000 | 1.696539000  |
|                 |              | 13           | 0.188531000  | -1.407702000 | 2.286491000  |
|                 |              | 13           | -1.571023000 | 0.185743000  | -1.599250000 |
|                 |              | 13           | 1.588110000  | -2.361947000 | 0.133099000  |
|                 |              | 13           | -3.779711000 | -0.704066000 | -0.289378000 |
|                 |              | 21           | 3.023859000  | 0.032215000  | -1.068681000 |
| 21              | -1.335653000 | -2.293624000 | -0.059619000 |              |              |
| <b>a.15.C.1</b> | singlet      | 13           | -0.545722000 | 1.360647000  | -2.162528000 |
|                 |              | 13           | -0.658050000 | -1.368609000 | -2.180786000 |
|                 |              | 13           | -1.861630000 | -2.370341000 | 0.165718000  |
|                 |              | 13           | -0.354812000 | -1.416867000 | 2.307186000  |
|                 |              | 13           | 3.443195000  | -1.816661000 | -0.130076000 |
|                 |              | 13           | -0.500218000 | 0.019626000  | 0.065362000  |
|                 |              | 13           | 1.821618000  | -0.087856000 | 1.378233000  |
|                 |              | 13           | 0.882647000  | -2.413555000 | 0.011754000  |
|                 |              | 13           | -2.612836000 | 0.028400000  | 1.708289000  |
|                 |              | 13           | -0.298732000 | 1.411039000  | 2.266568000  |
|                 |              | 13           | 1.631982000  | -0.136710000 | -1.530613000 |
|                 |              | 13           | -1.767340000 | 2.322719000  | 0.062910000  |
|                 |              | 13           | 3.743312000  | 0.824076000  | -0.234581000 |
|                 |              | 21           | -3.026608000 | -0.114733000 | -1.050552000 |
| 21              | 1.216876000  | 2.370599000  | -0.018815000 |              |              |
